# Supplementary material
Source: PubMed Central journal article supplement (PMC3138730)
Supplement: NIHMS294138-supplement-1_si_001.pdf [file NIHMS294138-supplement-1_si_001.pdf]

## Development of a Two-step Route to 3-PBC and $\beta$ CCt, Two Agents Active Against Alcohol Self-Administration in Rodent and Primate Models

Ojas A. Namjoshi, Agnieszka Grzybewska, German O. Fonseca, Michael L. Van Linn, Zh-jian Wang, Jeffrey R. Deschamps,<sup>b</sup> James M. Cook<sup>a,\*</sup>

<sup>a</sup> Department of Chemistry and Biochemistry, University of Wisconsin-Milwaukee, Milwaukee, WI 53211

<sup>b</sup> Laboratory for the Structure of Matter, Code 6030, Naval Research Laboratory, 4555 Overlook Avenue SW, Washington, DC

### Supporting Information

#### Contents:

|                                                                                |         |
|--------------------------------------------------------------------------------|---------|
| Copies of NMR spectra of intermediates and target compounds                    | S2-S57  |
| <i>N</i> -phenyl-6-propoxypyridin-3-amine (5a)                                 | S2      |
| <i>N</i> -(2-chlorophenyl)-6-propoxypyridin-3-amine (5b)                       | S4      |
| <i>N</i> -(2-chlorophenyl)-6-methoxypyridin-3-amine (8a)                       | S6      |
| <i>N</i> -(2-chlorophenyl)-6-ethoxypyridin-3-amine (8b)                        | S8      |
| <i>N</i> -(2-chlorophenyl)-6-isopropoxypyridin-3-amine (8c)                    | S10     |
| 6-butoxy- <i>N</i> -(2-chlorophenyl)pyridin-3-amine (8d)                       | S12     |
| <i>N</i> -(2-chlorophenyl)-6-isobutoxypyridin-3-amine (8e)                     | S14     |
| 6-( <i>tert</i> -butoxy)- <i>N</i> -(2-chlorophenyl)pyridin-3-amine (8f)       | S16     |
| 6-(benzyloxy)- <i>N</i> -(2-chlorophenyl)pyridin-3-amine (8g)                  | S18     |
| <i>tert</i> -butyl 5-[(2-chlorophenyl)amino]picolinate (12)                    | S20     |
| 3-propoxy-9 <i>H</i> -pyrido[3,4- <i>b</i> ]indole (1)                         | S22     |
| 2-propoxy-5 <i>H</i> -pyrido[3,2- <i>b</i> ]indole (6)                         | S24     |
| 3-methoxy-9 <i>H</i> -pyrido[3,4- <i>b</i> ]indole (9a)                        | S26     |
| 2-methoxy-5 <i>H</i> -pyrido[3,2- <i>b</i> ]indole (10a)                       | S28     |
| 3-ethoxy-9 <i>H</i> -pyrido[3,4- <i>b</i> ]indole (9b)                         | S30     |
| 2-ethoxy-5 <i>H</i> -pyrido[3,2- <i>b</i> ]indole (10b)                        | S32     |
| 3-isopropoxy-9 <i>H</i> -pyrido[3,4- <i>b</i> ]indole (9c)                     | S34     |
| 2-isopropoxy-5 <i>H</i> -pyrido[3,2- <i>b</i> ]indole (10c)                    | S36     |
| 3-butoxy-9 <i>H</i> -pyrido[3,4- <i>b</i> ]indole (19d)                        | S38     |
| 2-butoxy-5 <i>H</i> -pyrido[3,2- <i>b</i> ]indole (10d)                        | S40     |
| 3-isobutoxy-9 <i>H</i> -pyrido[3,4- <i>b</i> ]indole (9e)                      | S42     |
| 2-isobutoxy-5 <i>H</i> -pyrido[3,2- <i>b</i> ]indole (10e)                     | S44     |
| 3-( <i>tert</i> -butoxy)-9 <i>H</i> -pyrido[3,4- <i>b</i> ]indole (9f)         | S46     |
| 2-( <i>tert</i> -butoxy)-5 <i>H</i> -pyrido[3,2- <i>b</i> ]indole (10f)        | S48     |
| 3-(benzyloxy)-9 <i>H</i> -pyrido[3,4- <i>b</i> ]indole (9g)                    | S50     |
| 2-(benzyloxy)-5 <i>H</i> -pyrido[3,2- <i>b</i> ]indole (10g)                   | S52     |
| <i>tert</i> -butyl 9 <i>H</i> -pyrido[3,4- <i>b</i> ]indole-3-carboxylate (2)  | S54     |
| <i>tert</i> -butyl 5 <i>H</i> -pyrido[3,2- <i>b</i> ]indole-2-carboxylate (18) | S56     |
| X-ray diffraction data for compounds 1 and 6                                   | S58-S73 |
| Figure s1. ORTEP drawing for 1                                                 | S59     |
| Figure s2. ORTEP drawing for 6                                                 | S59     |

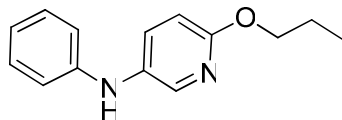

**N-phenyl-6-propoxy pyridin-3-amine (5a)**

**Proton Spectrum**

Current Data Parameters  
 NAME ON-I-70  
 EXPNO 1  
 PROCNO 1

F2 - Acquisition Paramete  
 Date 20110217  
 Time 17.06  
 INSTRUM spect  
 PROBHD 5 mm Multinucl  
 PULPROG zg30  
 TD 32768  
 SOLVENT CDCl3  
 NS 16  
 DS 0  
 SWH 6172.839  
 FIDRES 0.188380  
 AQ 2.6542580  
 RG 203.2  
 DW 81.000  
 DE 6.00  
 TE 299.0  
 D1 1.00000000  
 TD0 1

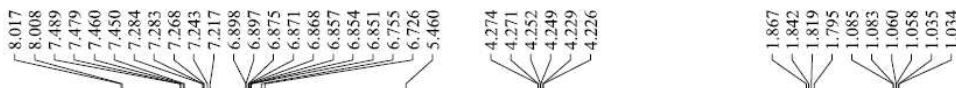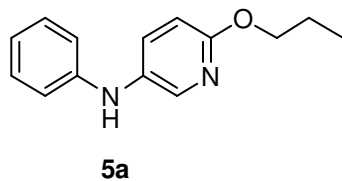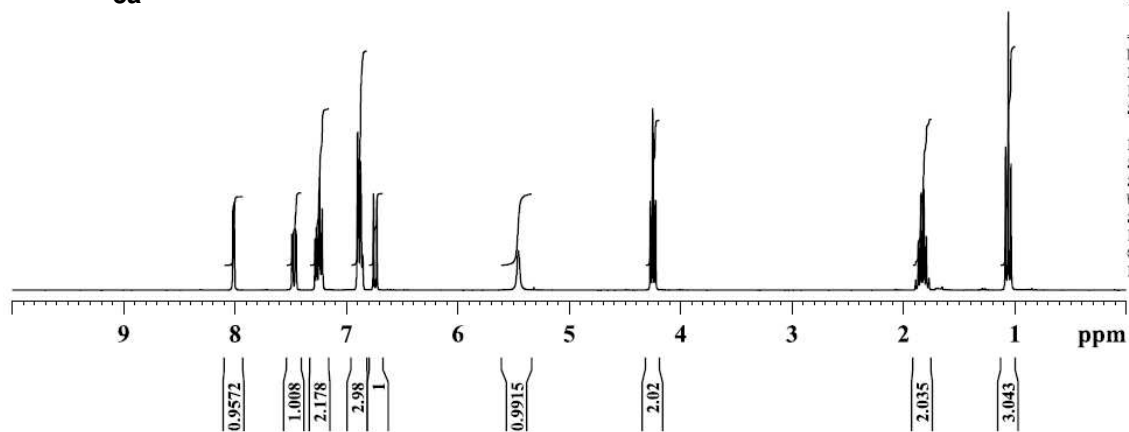

===== CHANNEL f1 ===  
 NUC1 1H  
 P1 9.00  
 PL1 -6.00  
 SFO1 300.1318534

F2 - Processing paramete  
 SI 32768  
 SF 300.1300000  
 WDW no  
 SSB 0  
 LB 0.00  
 GB 0  
 PC 1.00

### Carbon Spectrum

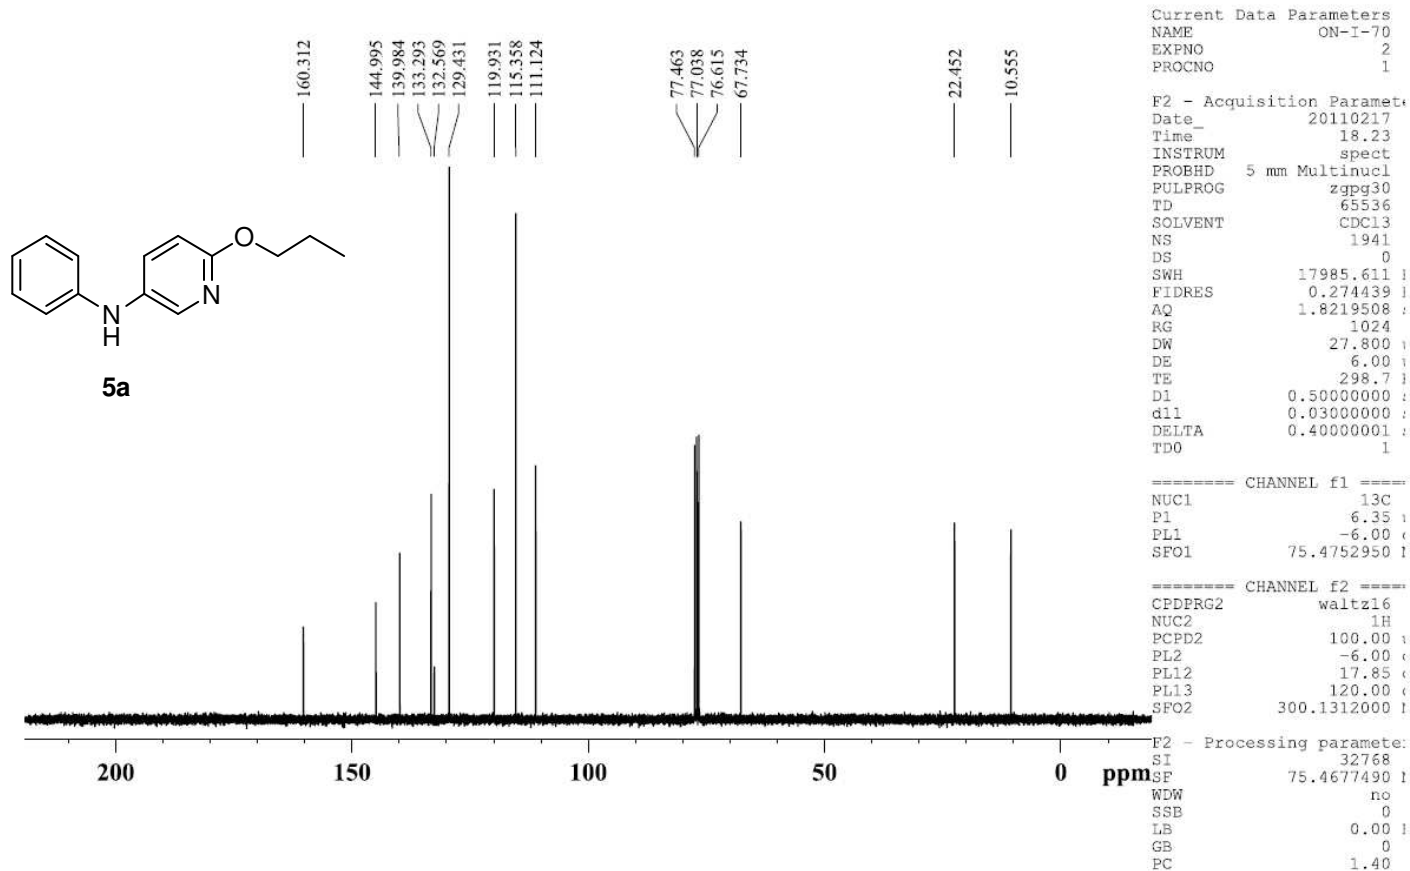

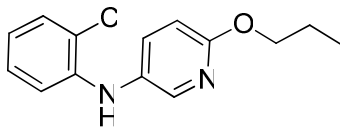

**N-(2-chlorophenyl)-6-propoxy-pyridin-3-amine (5b)**

**Proton Spectrum**

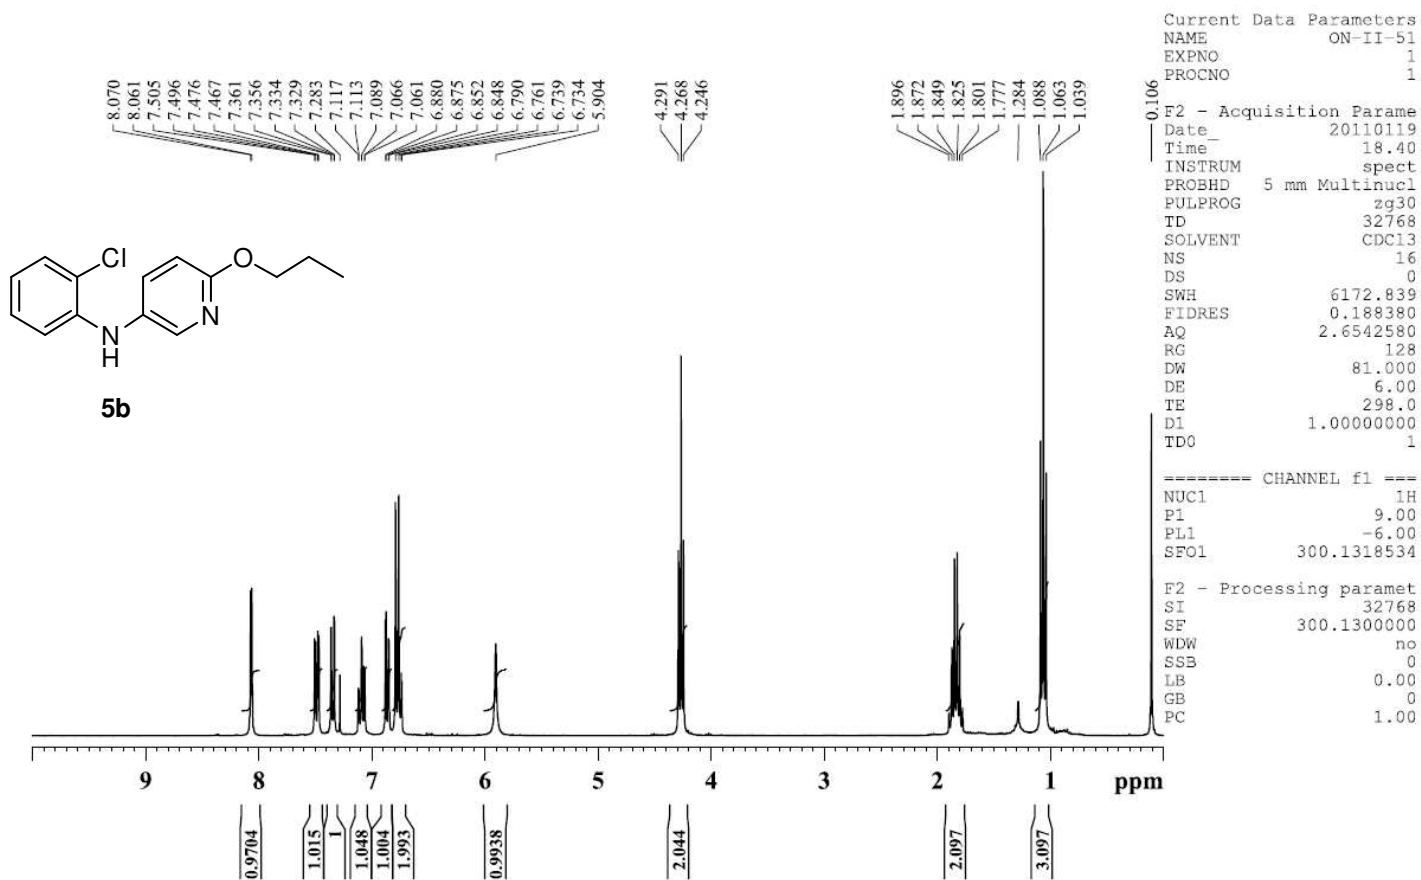

Carbon Spectrum

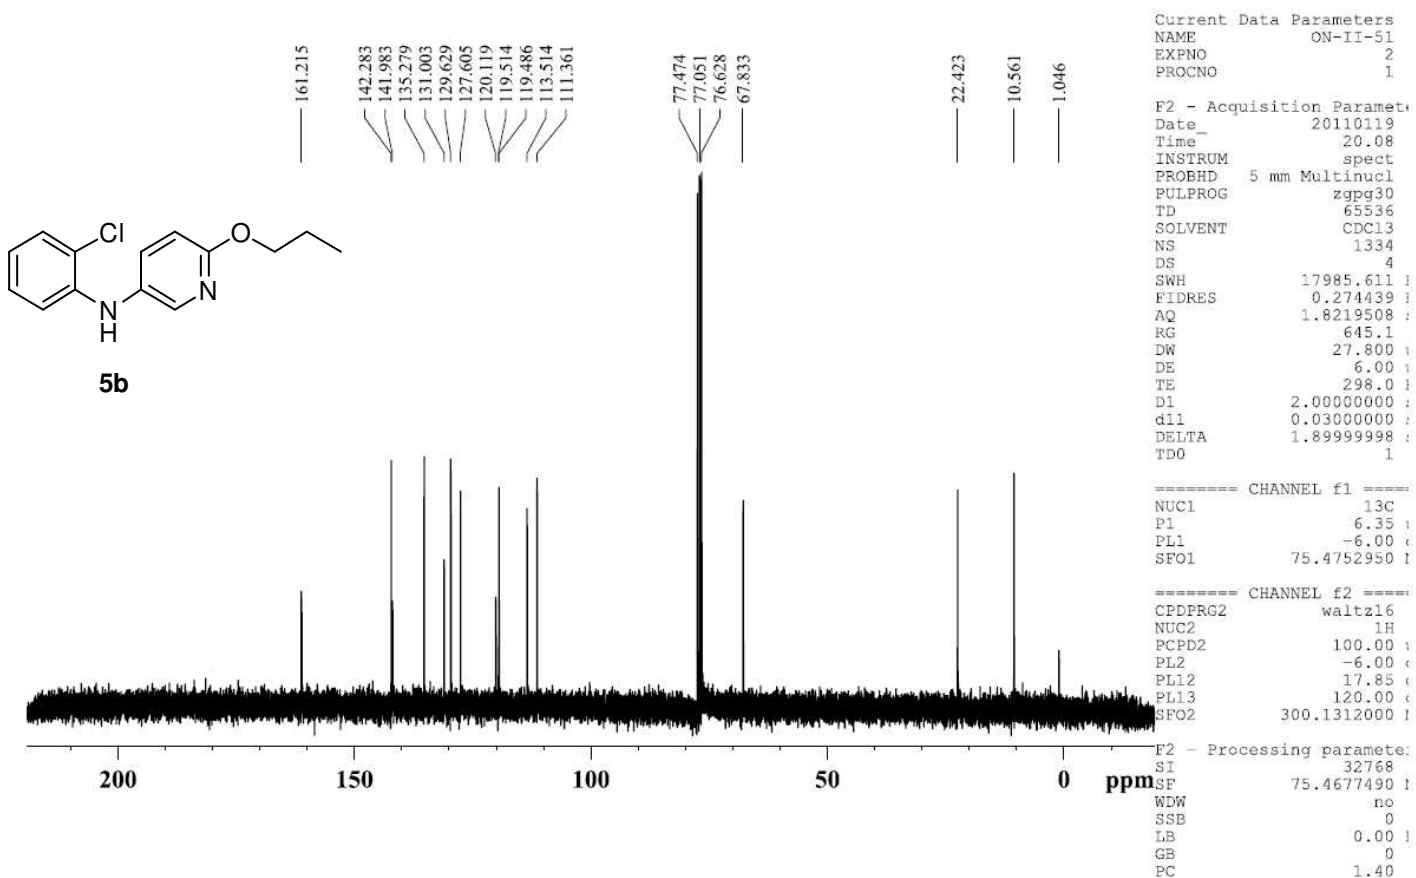

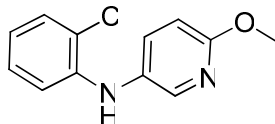

**N-(2-chlorophenyl)-6-methoxypyridin-3-amine (8a)**

**Proton Spectrum**

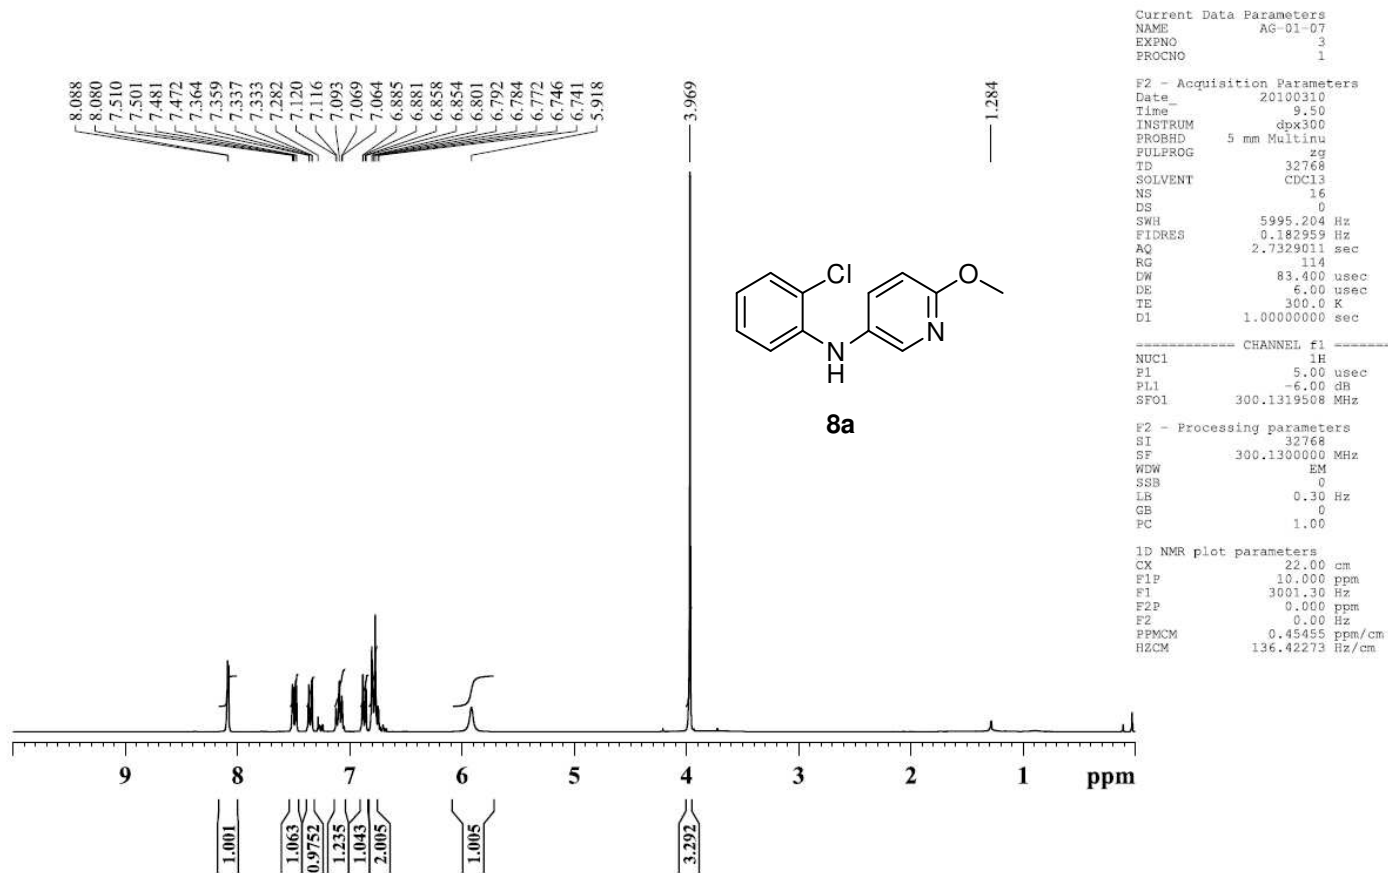

### Carbon Spectrum

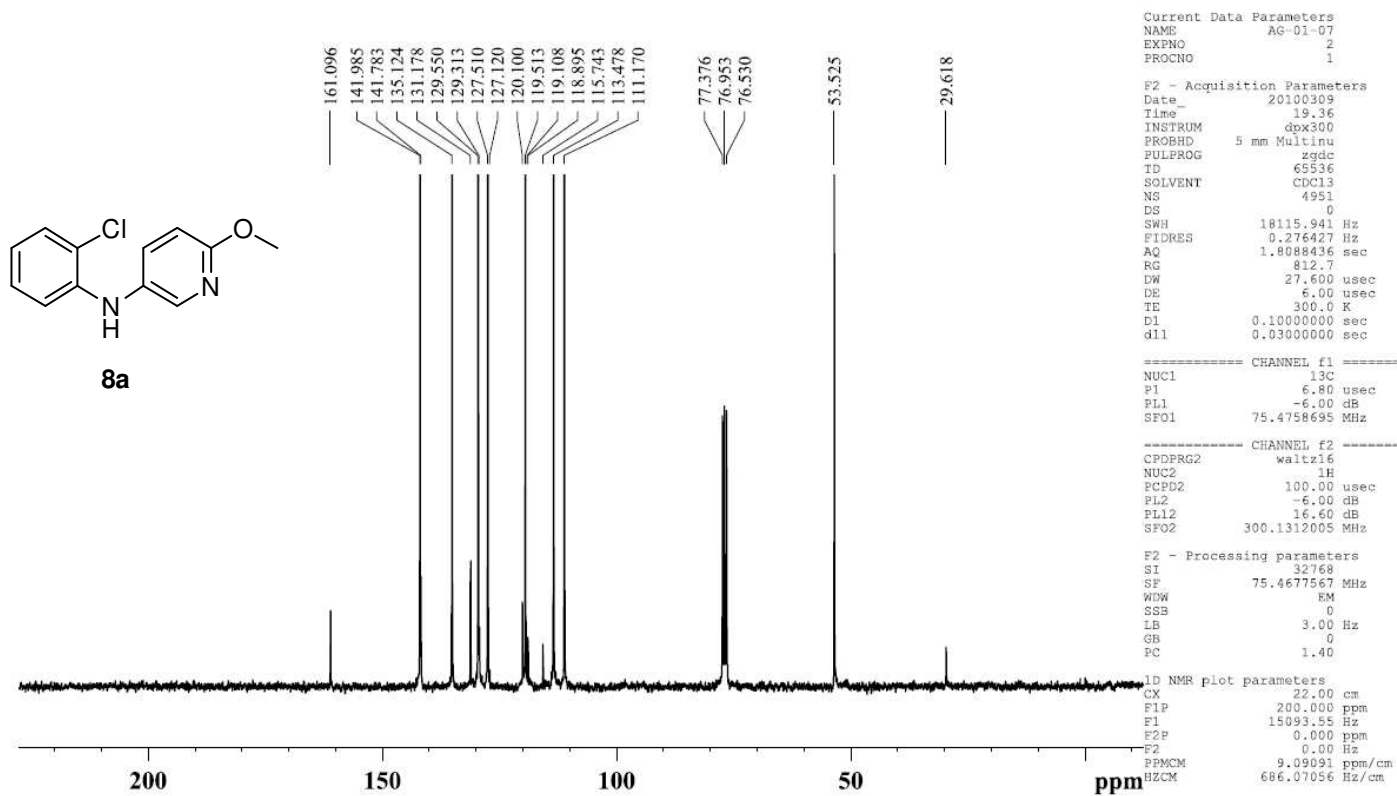

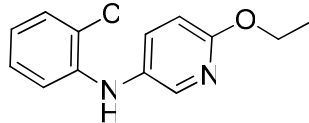

**N-(2-chlorophenyl)-6-ethoxypyridin-3-amine (8b)**  
**Proton Spectrum**

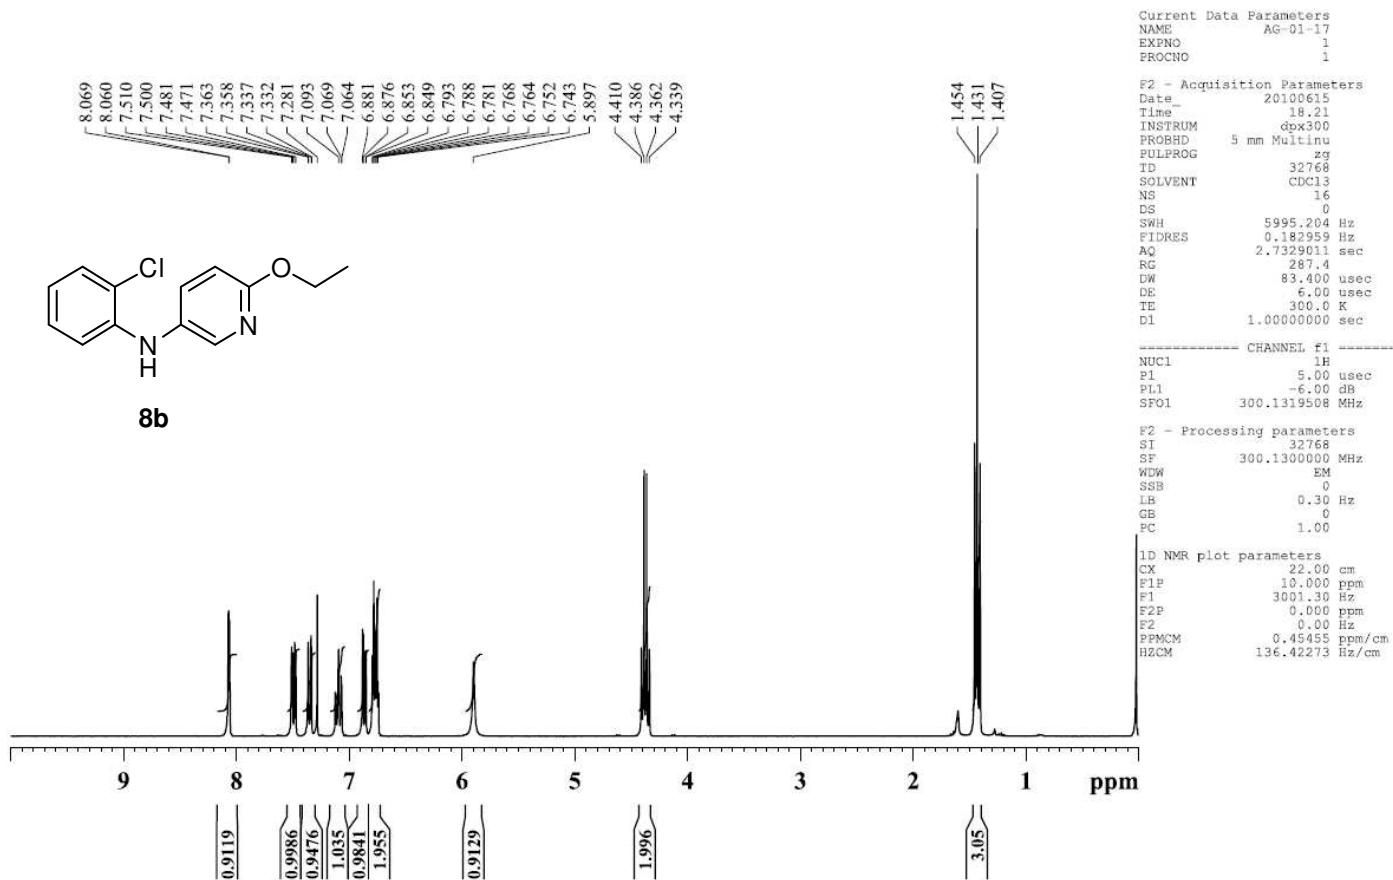



### Carbon Spectrum

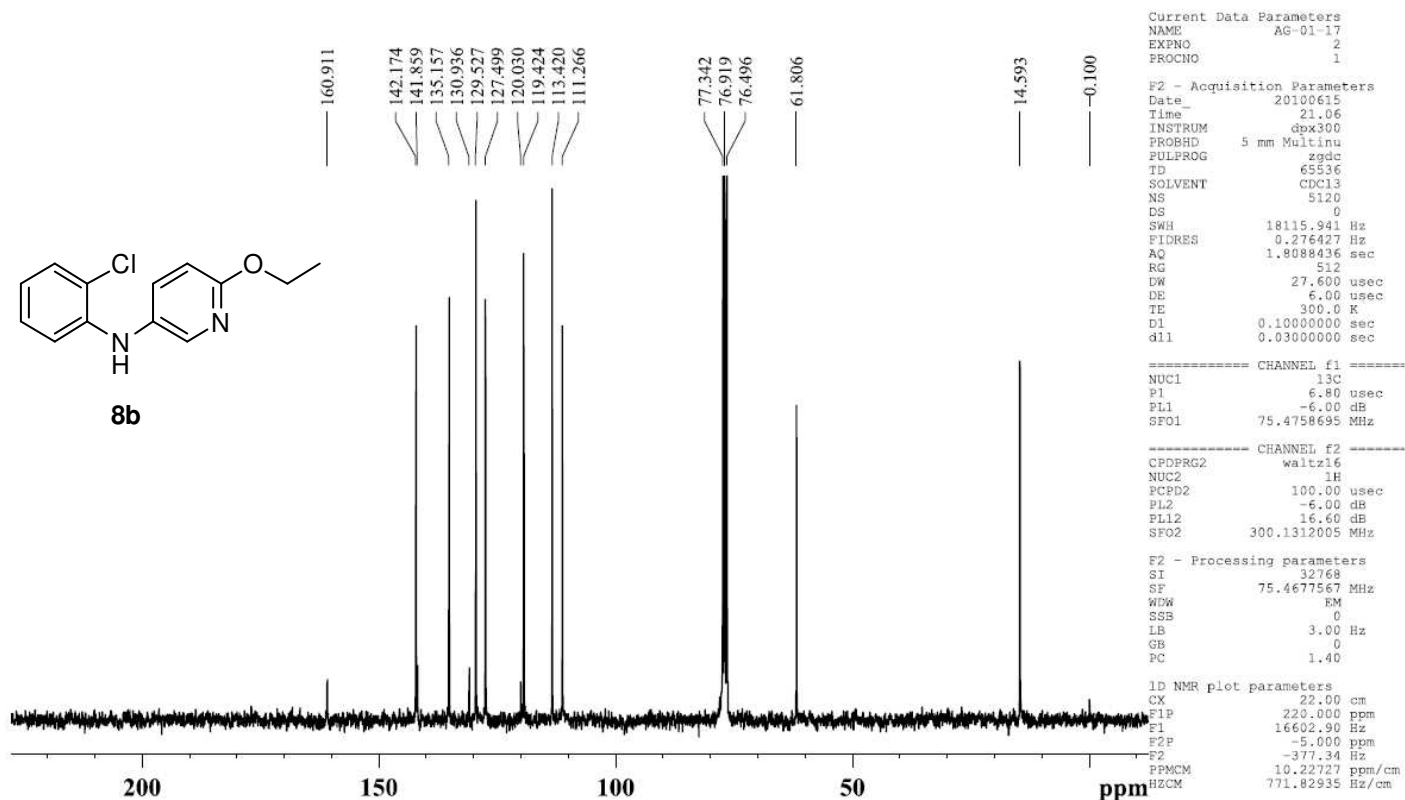

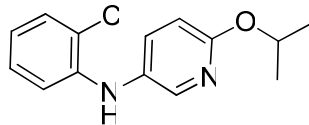

**N-(2-chlorophenyl)-6-isopropoxy pyridin-3-amine (8c)**

**Proton Spectrum**

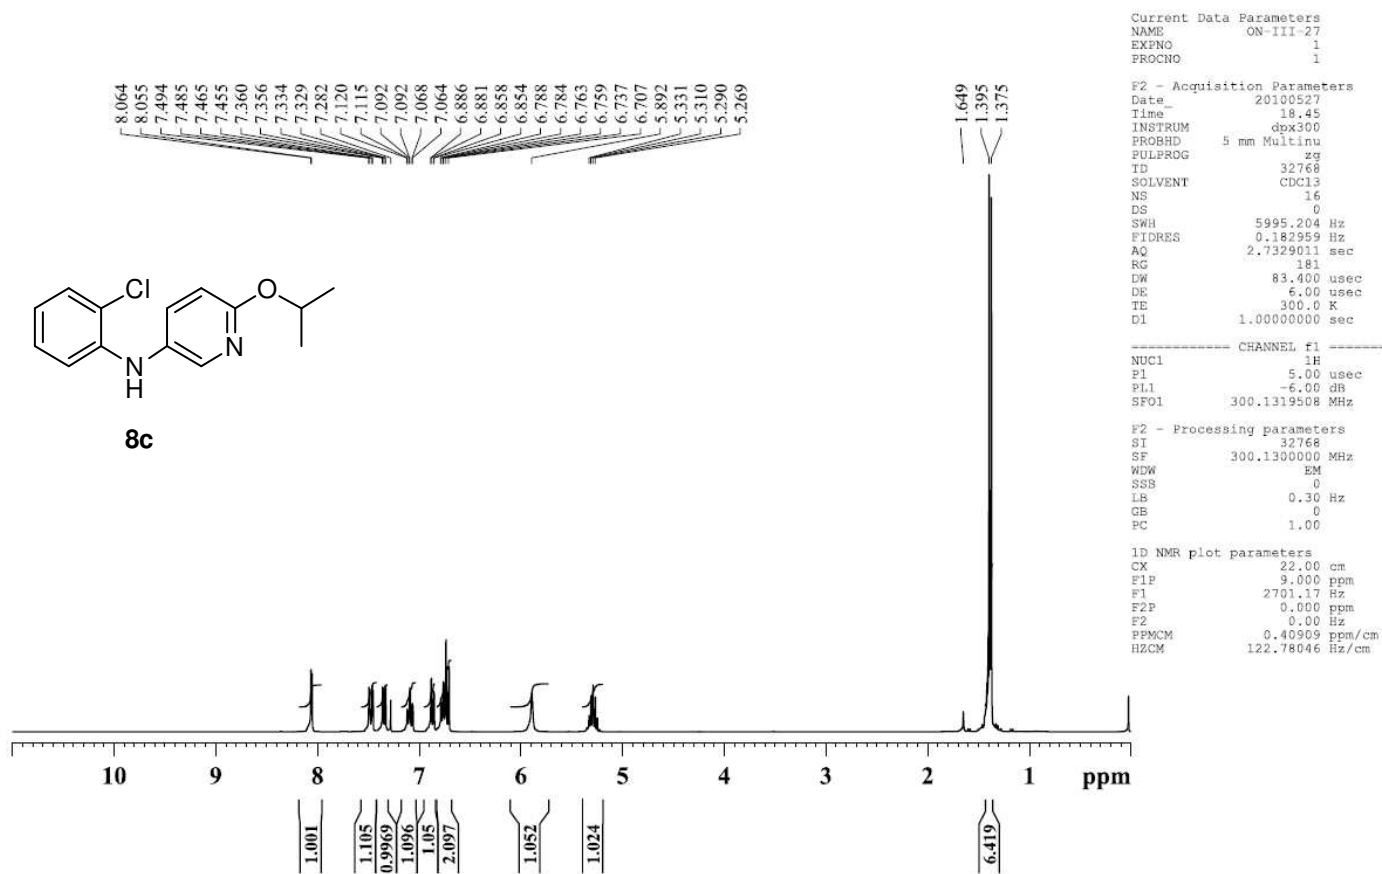

### Carbon Spectrum

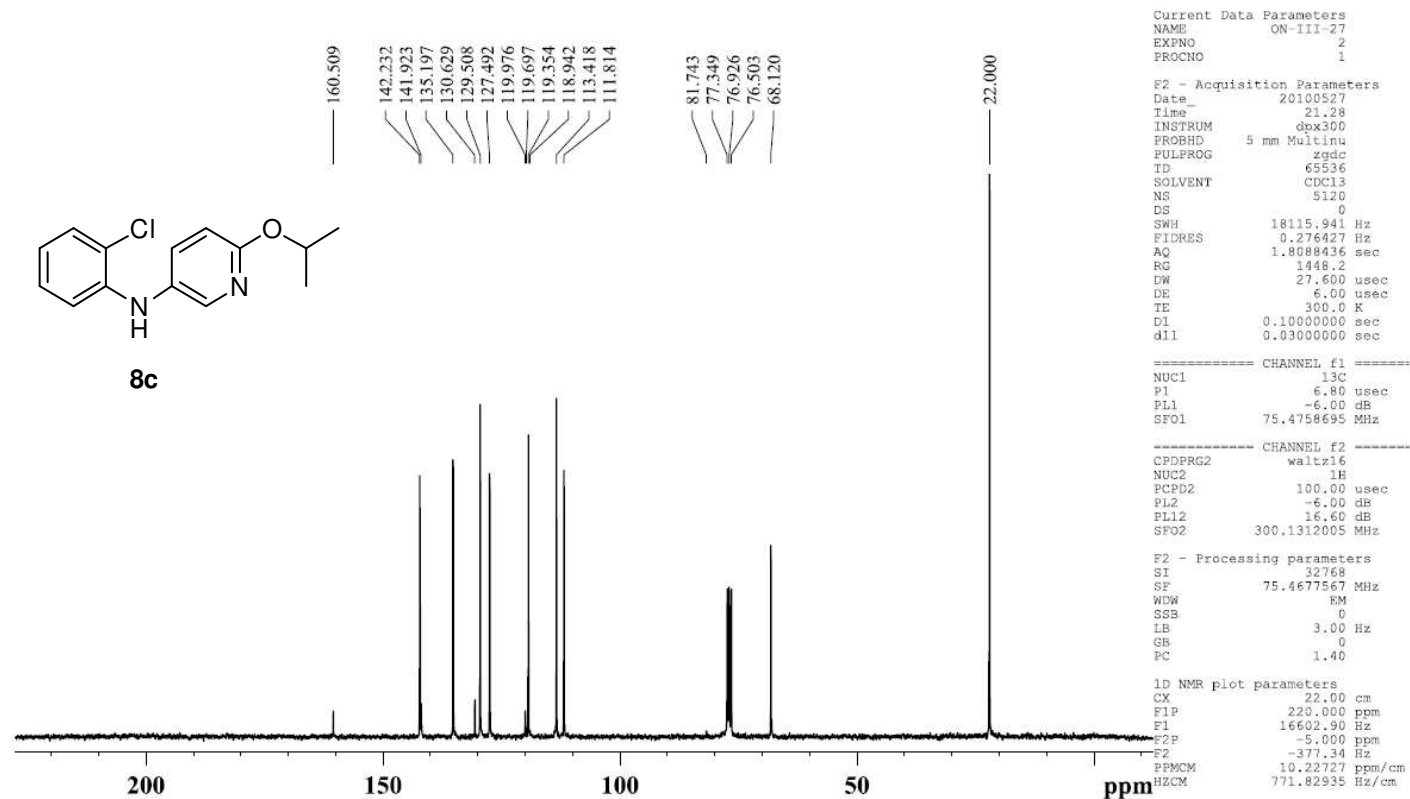

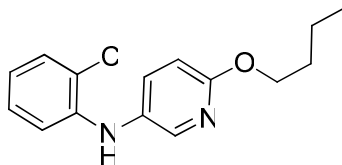

**6-butoxy-N-(2-chlorophenyl)pyridin-3-amine (8d)**

**Proton Spectrum**

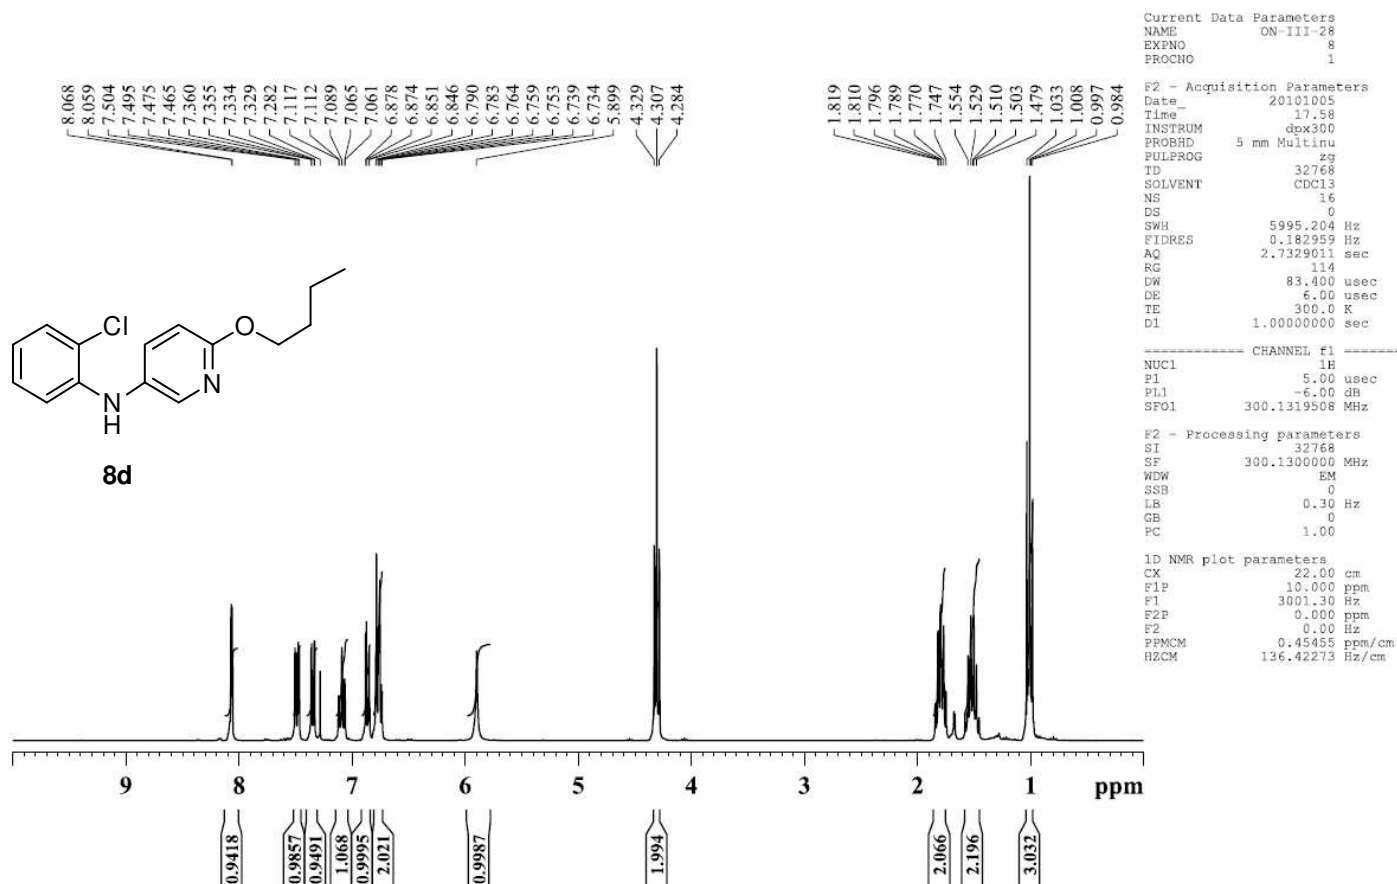

### Carbon Spectrum

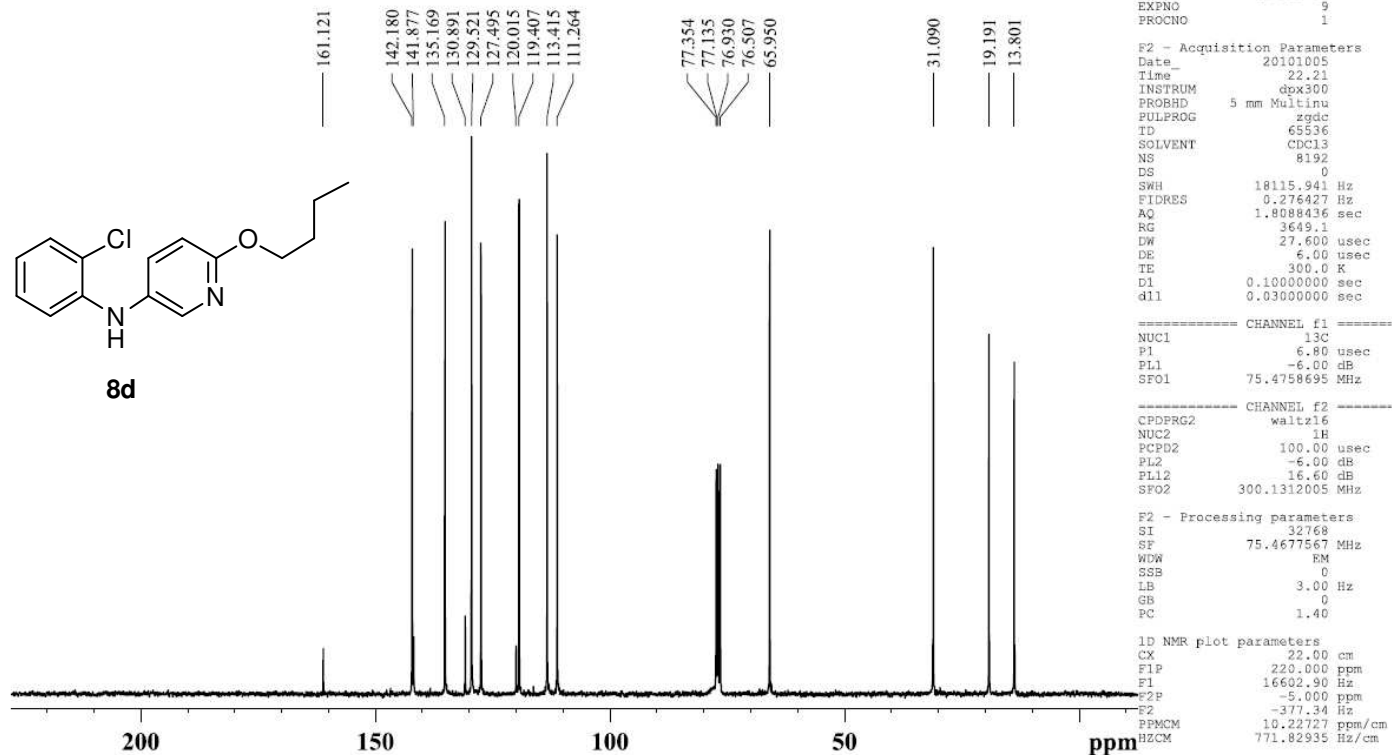

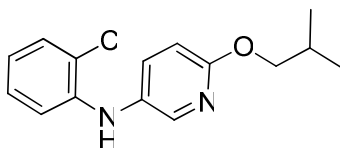

**N-(2-chlorophenyl)-6-isobutoxypyridin-3-amine (8e)**

**Proton Spectrum**

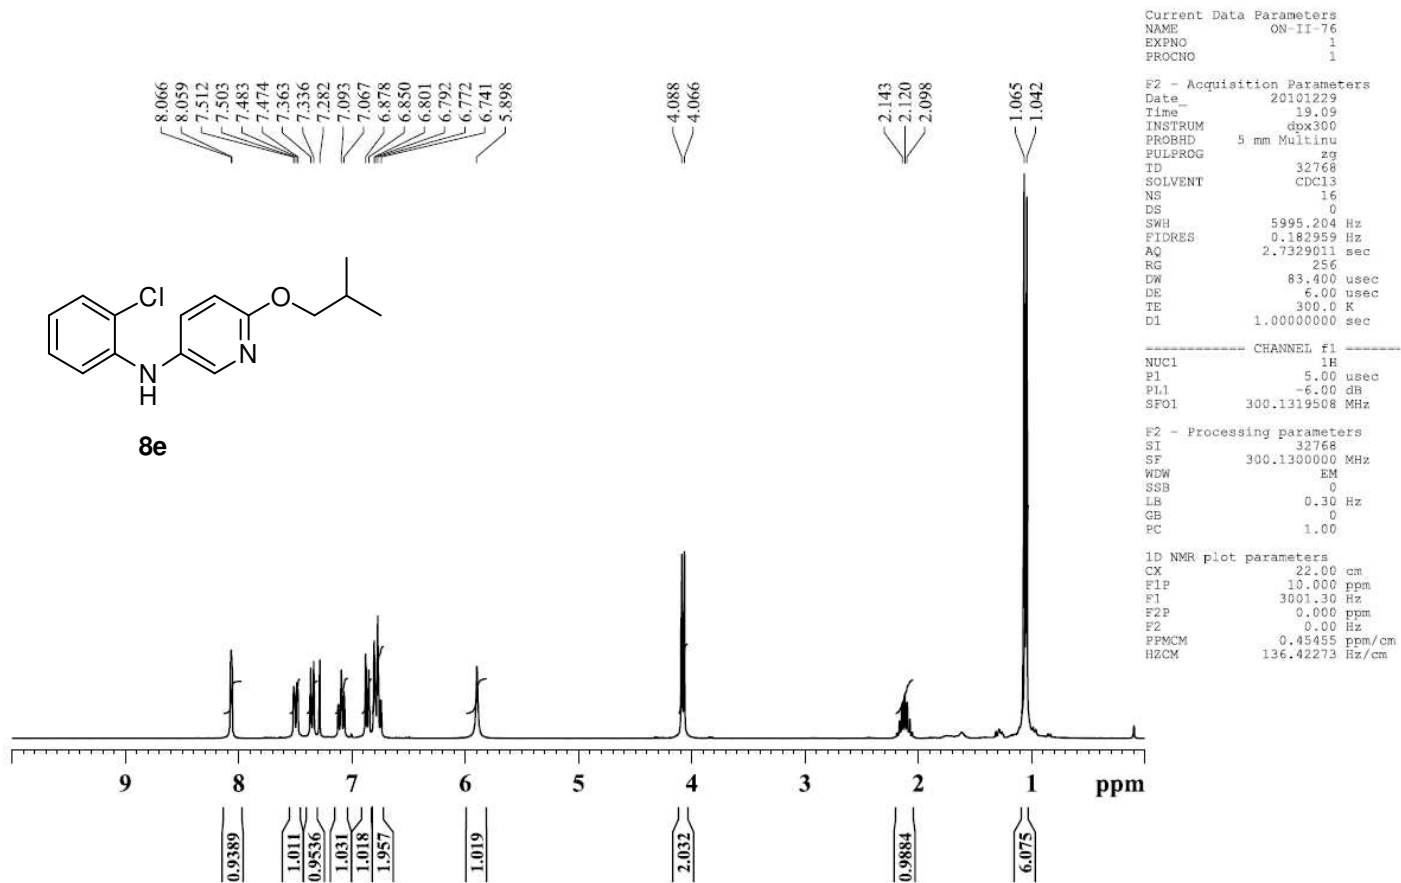

### Carbon Spectrum

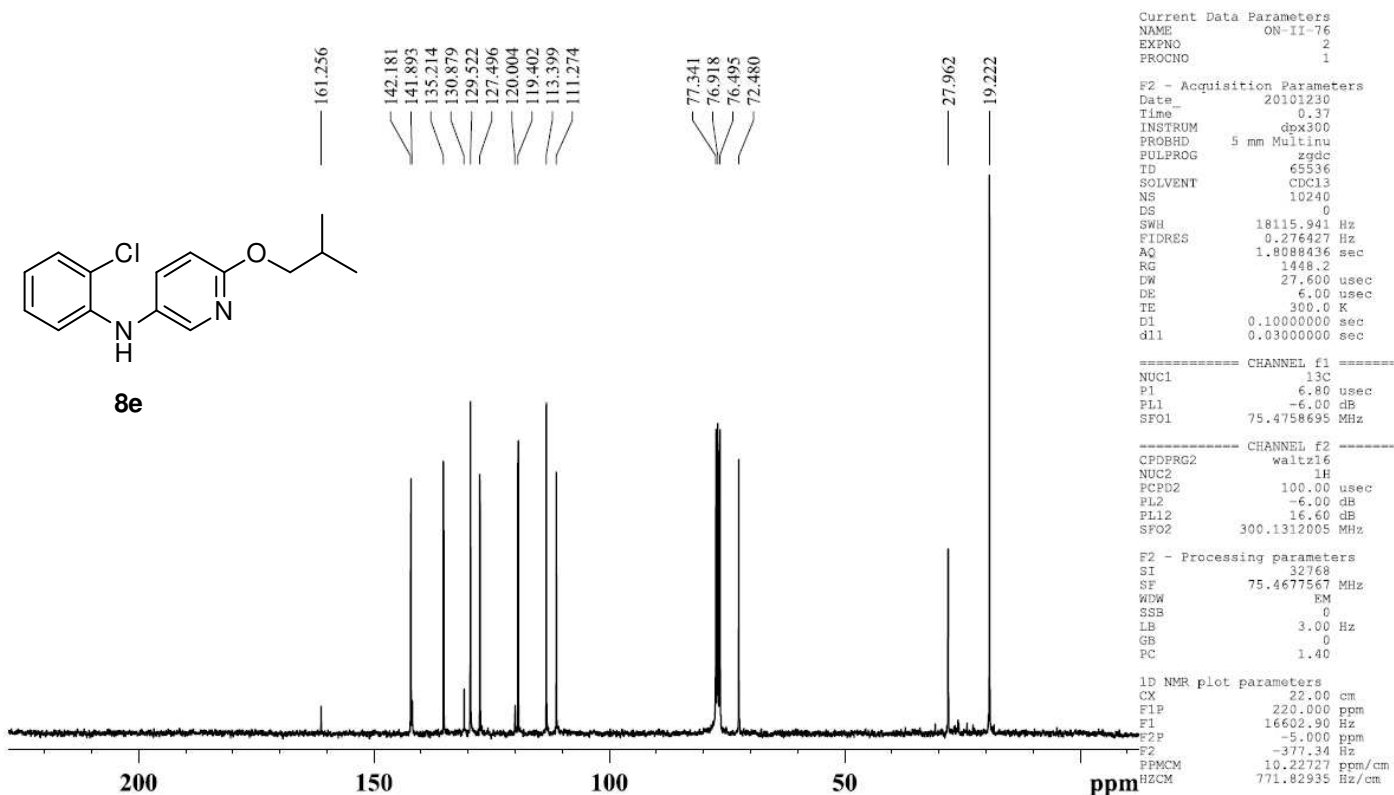

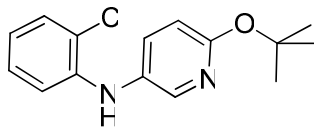

**6-(*tert*-butoxy)-*N*-(2-chlorophenyl)pyridin-3-amine (8f)**

**Proton Spectrum**

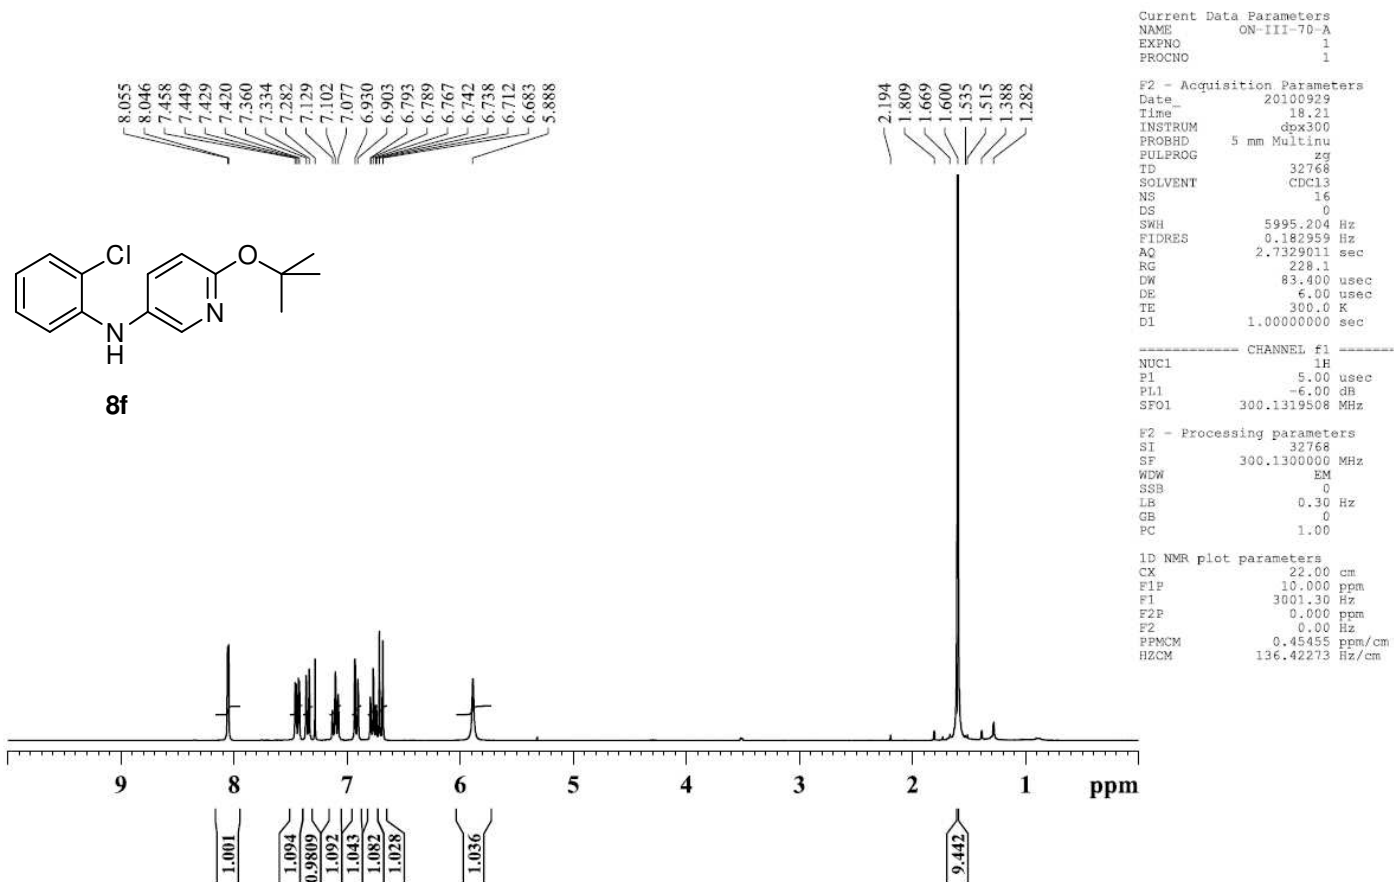



### Carbon Spectrum

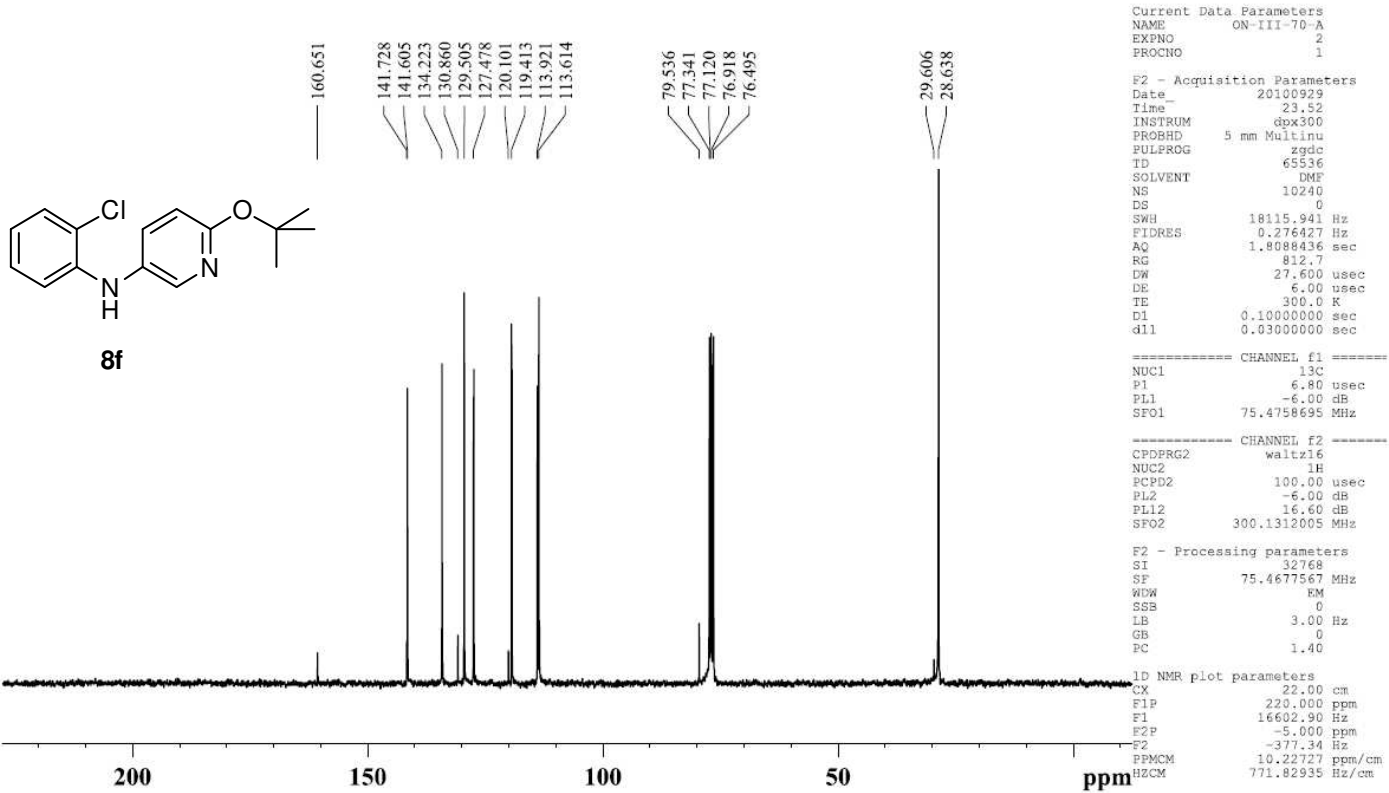

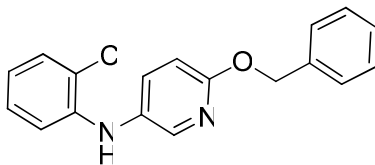

**6-(benzyloxy)-N-(2-chlorophenyl)pyridin-3-amine (8g)**

**Proton Spectrum**

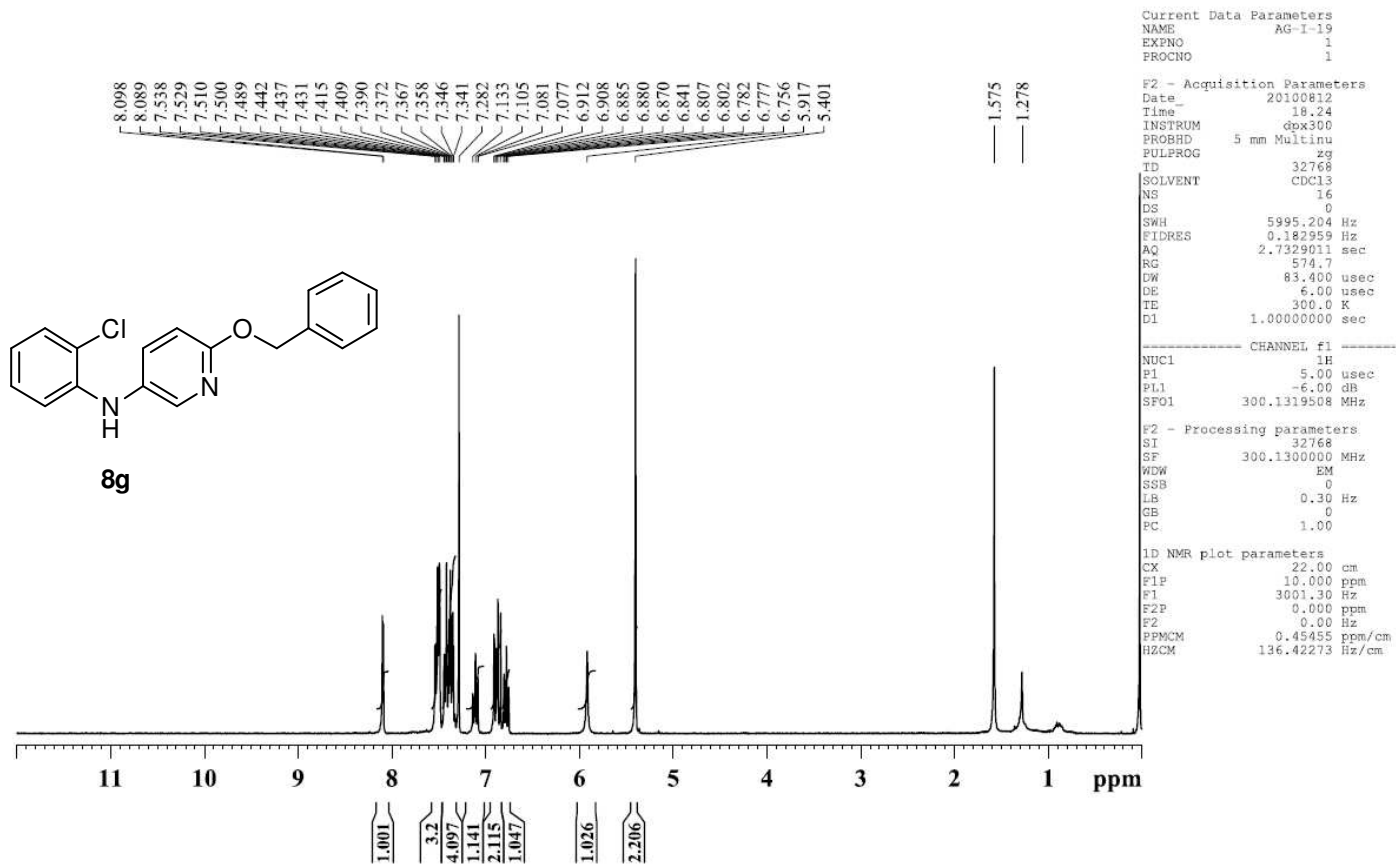

### Carbon Spectrum

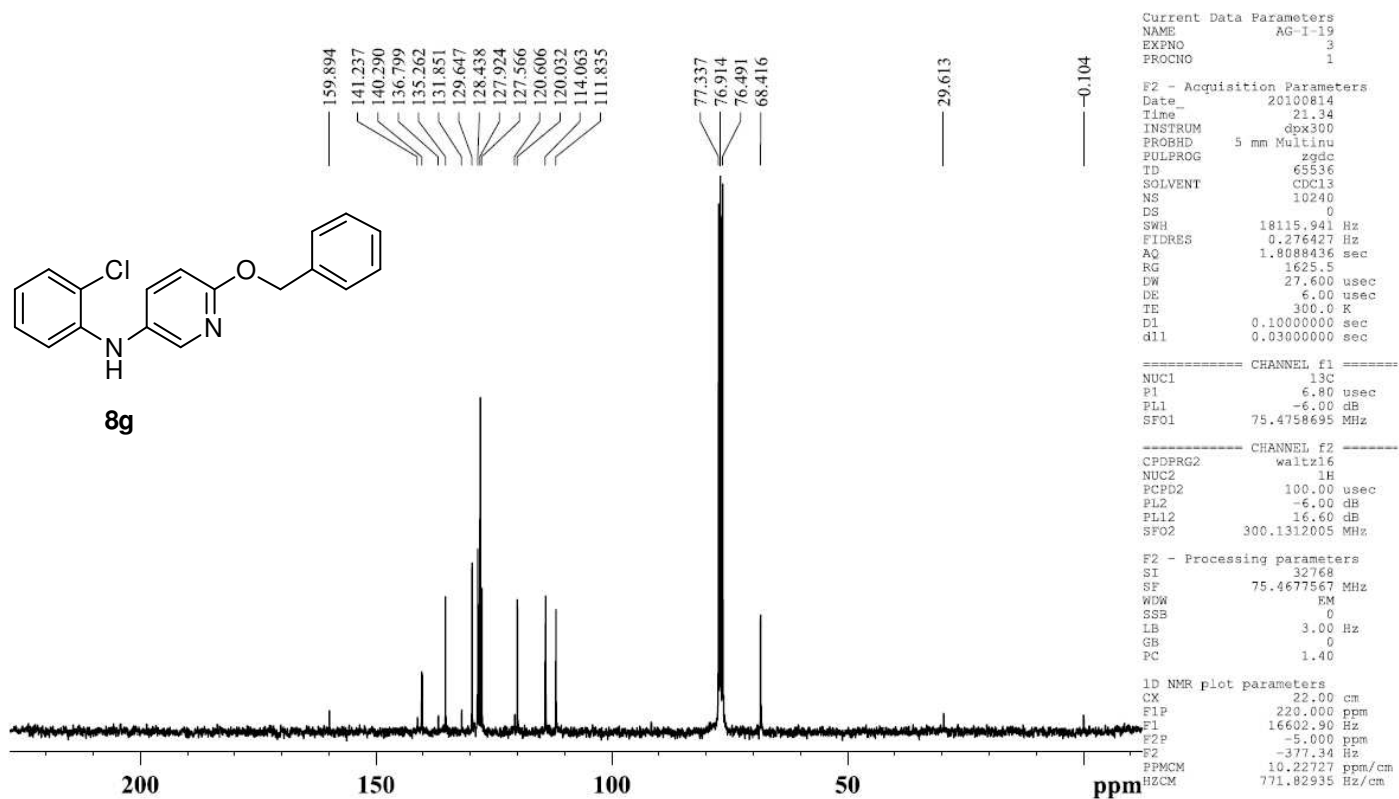

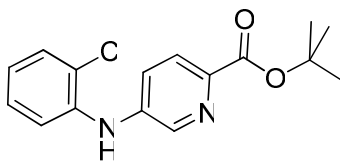

***tert*-butyl 5-[(2-chlorophenyl)amino]picolinate (12)**

**Proton Spectrum**

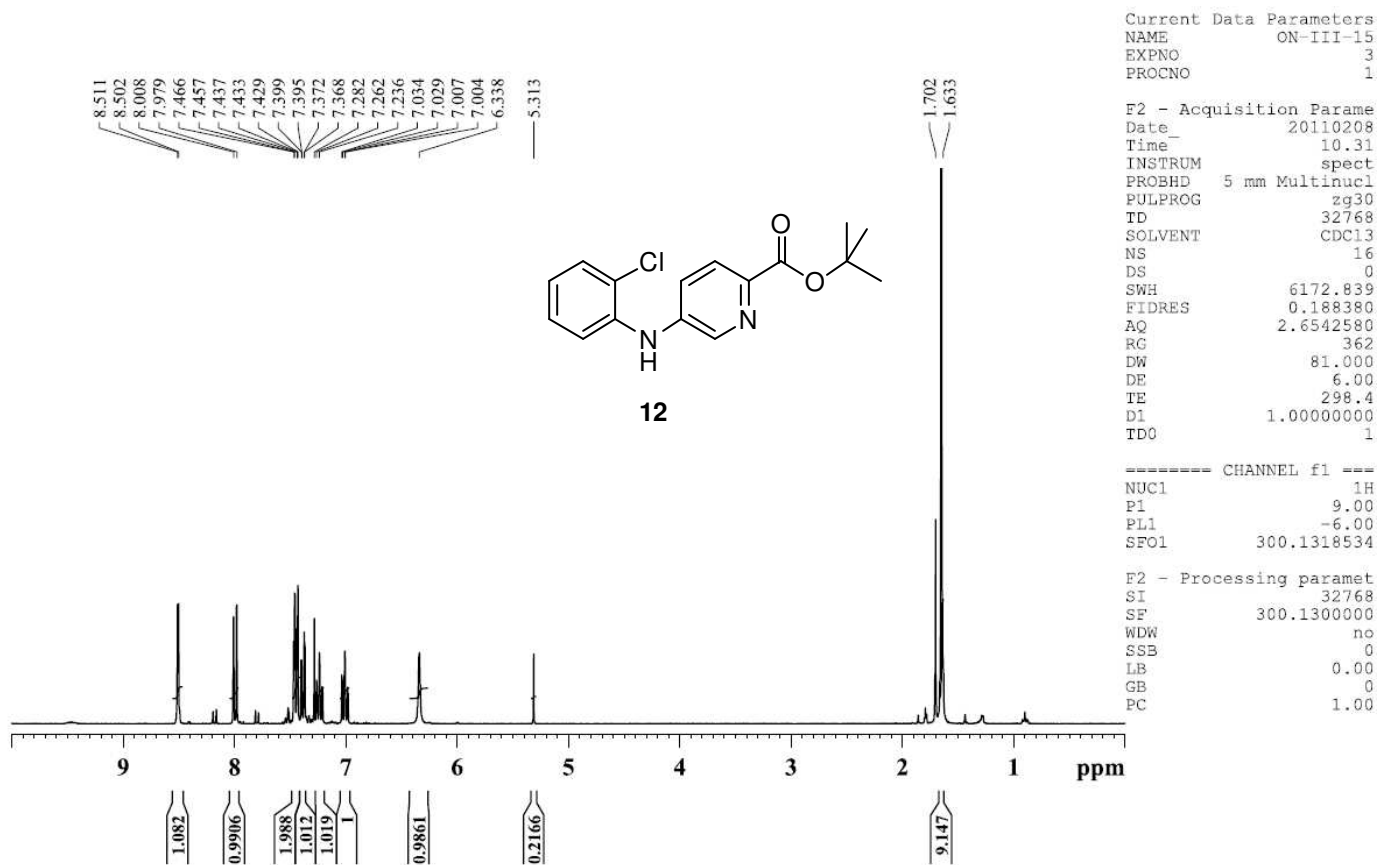

Carbon Spectrum

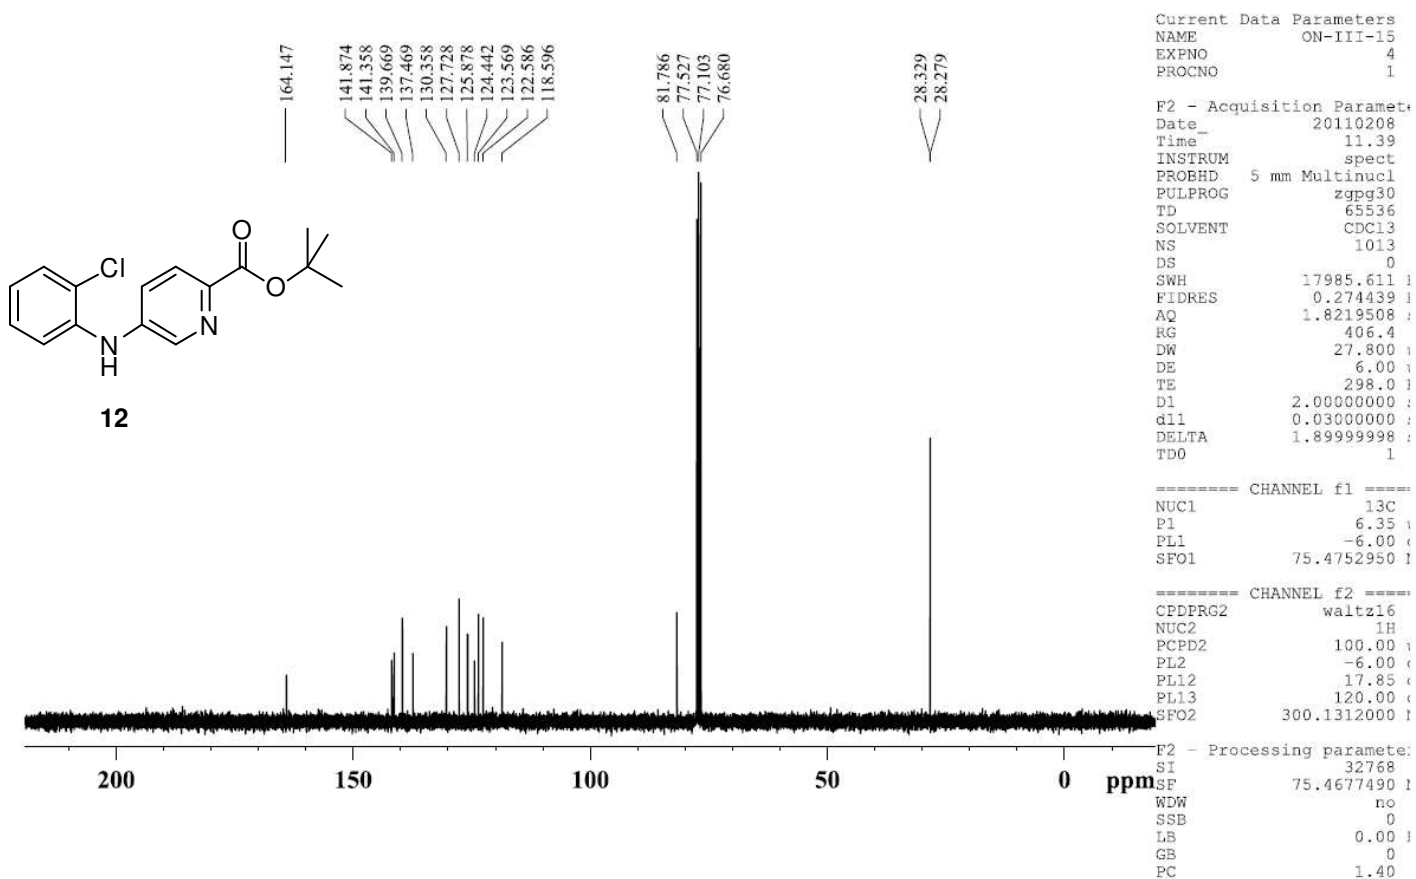

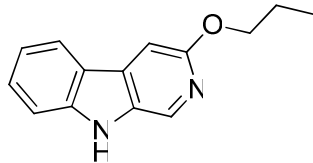

**3-propoxy-9H-pyrido[3,4-b]indole (1)**

Proton Spectrum

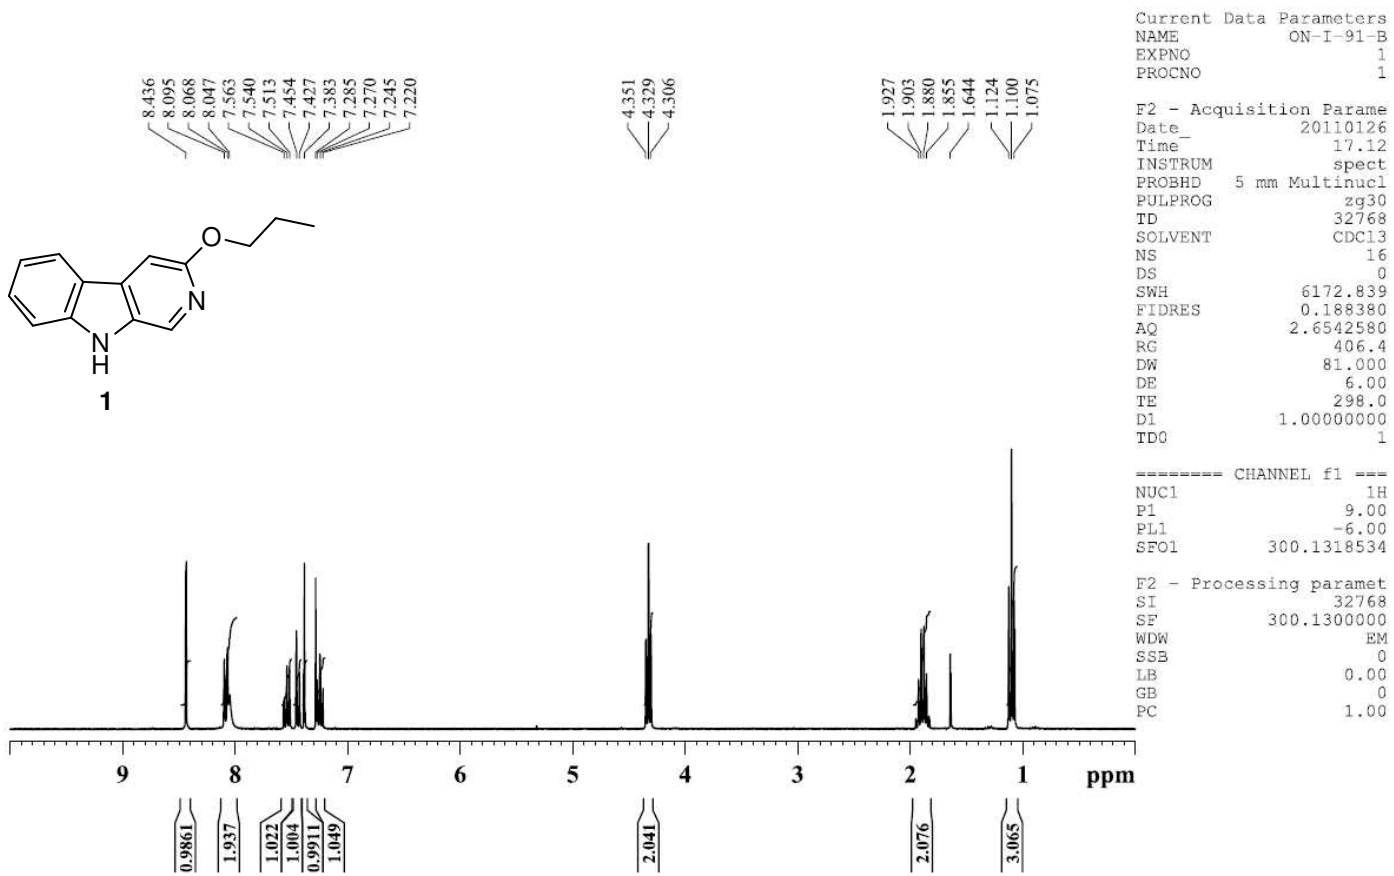

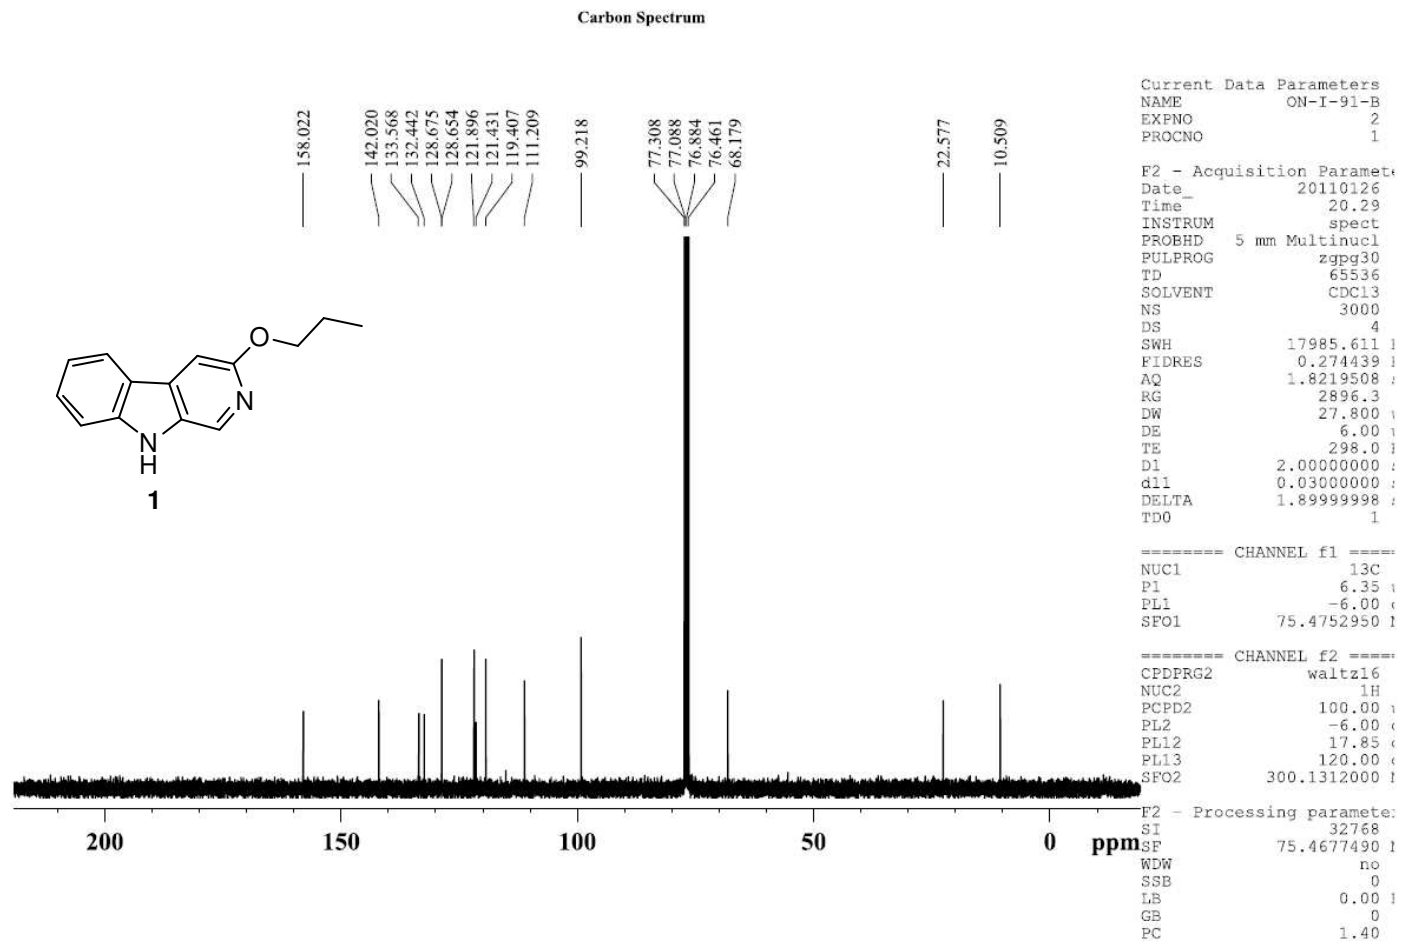

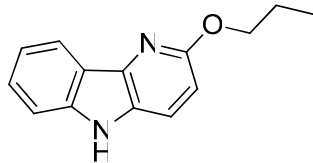

**2-propoxy-5H-pyrido[3,2-b]indole (6)**

**Proton Spectrum**

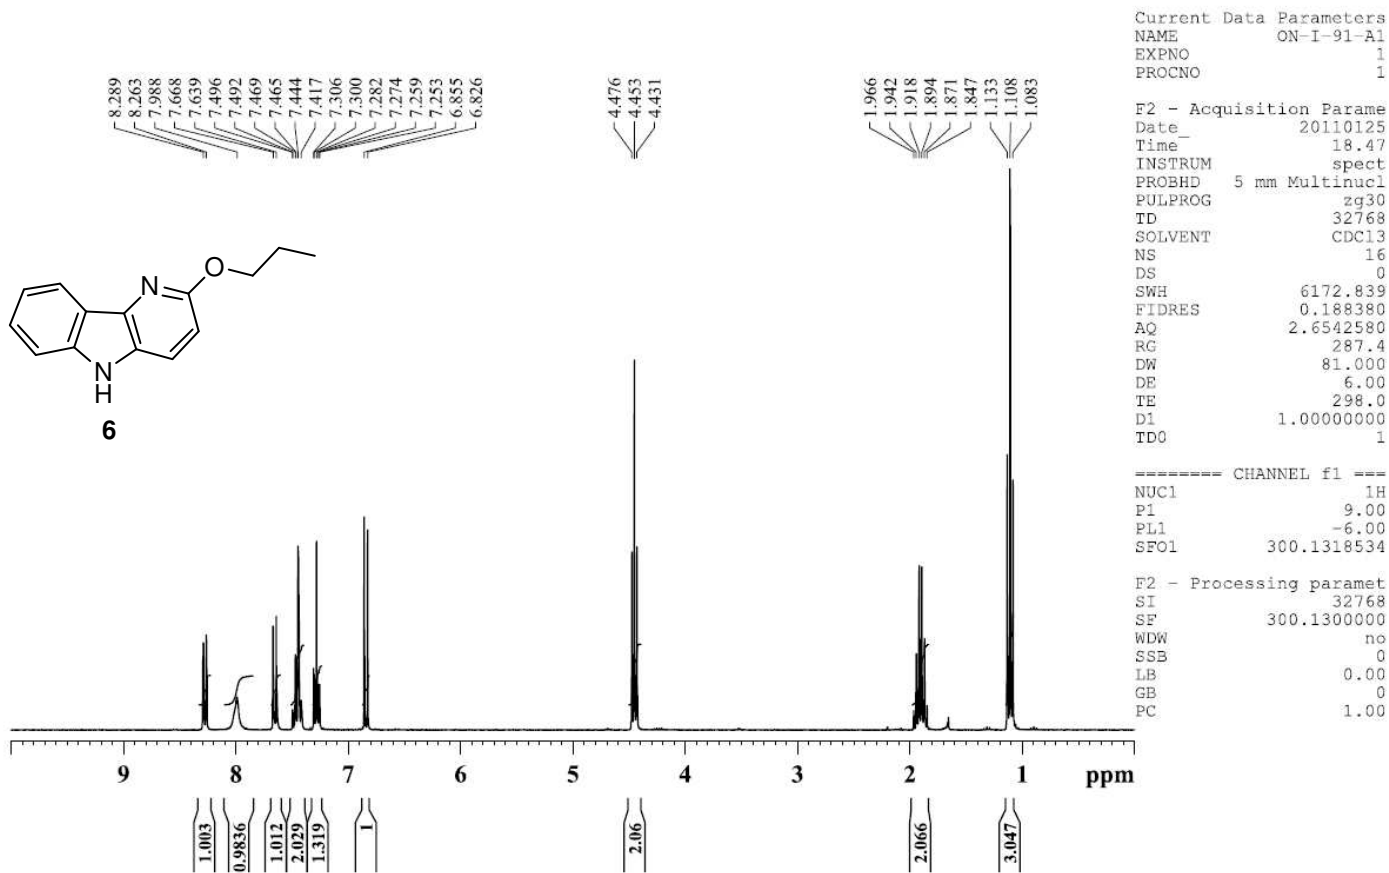



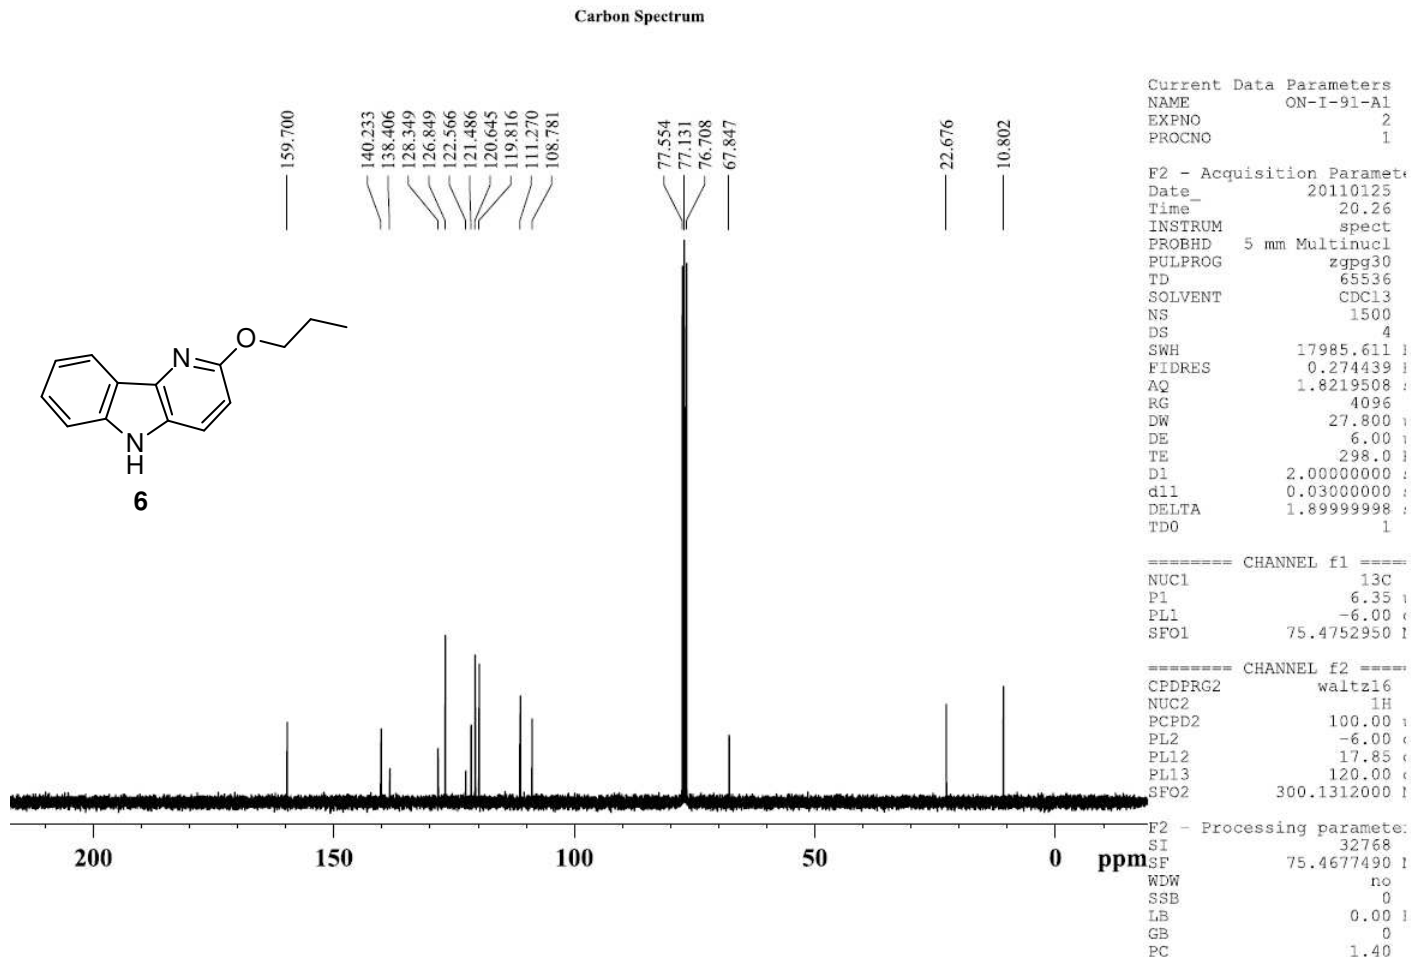

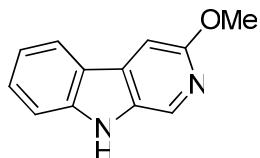

3-methoxy-9H-pyrido[3,4-b]indole (9a)

Proton Spectrum

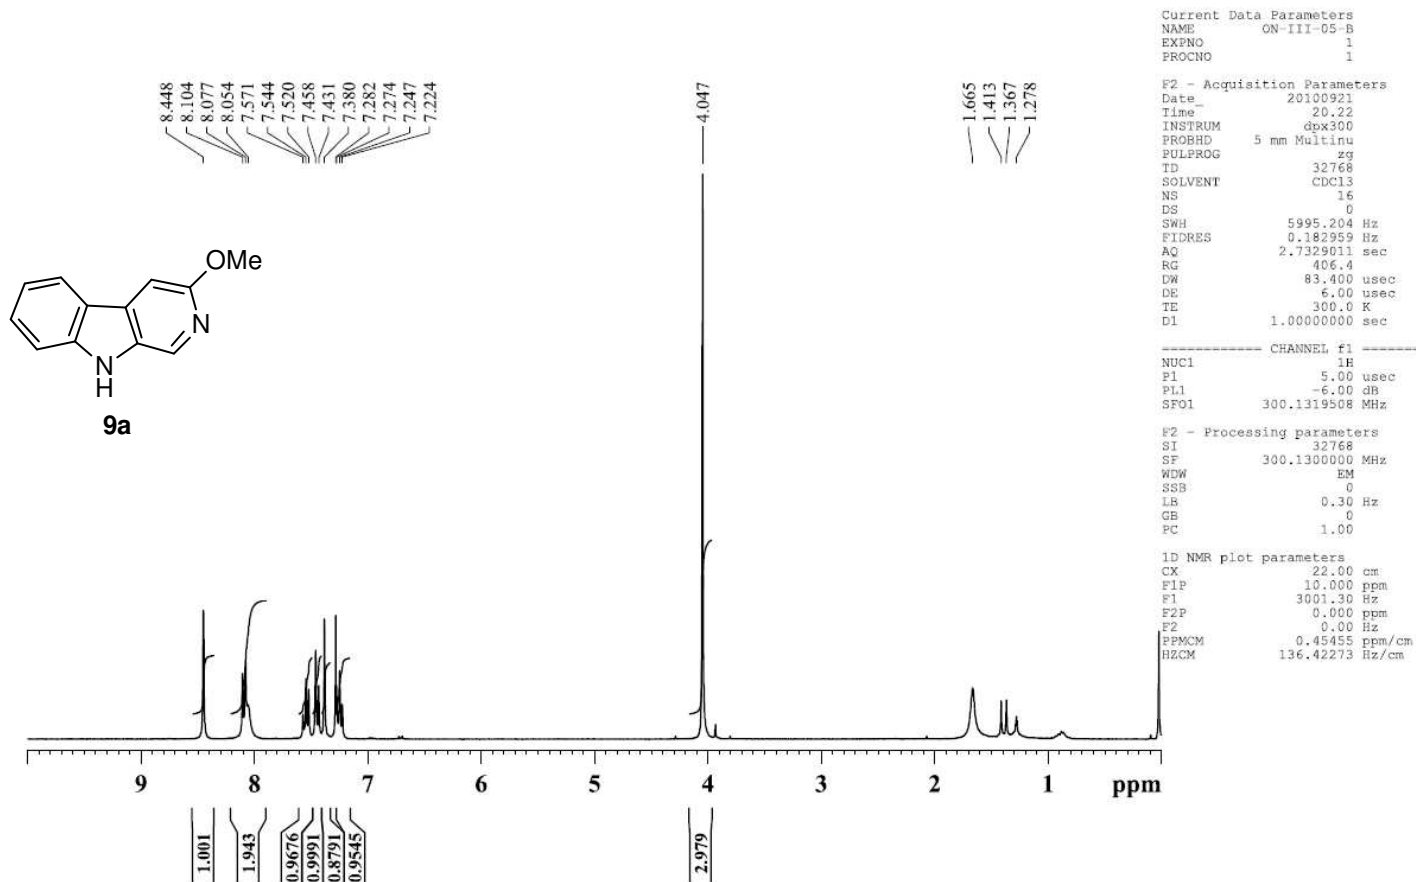

### Carbon Spectrum

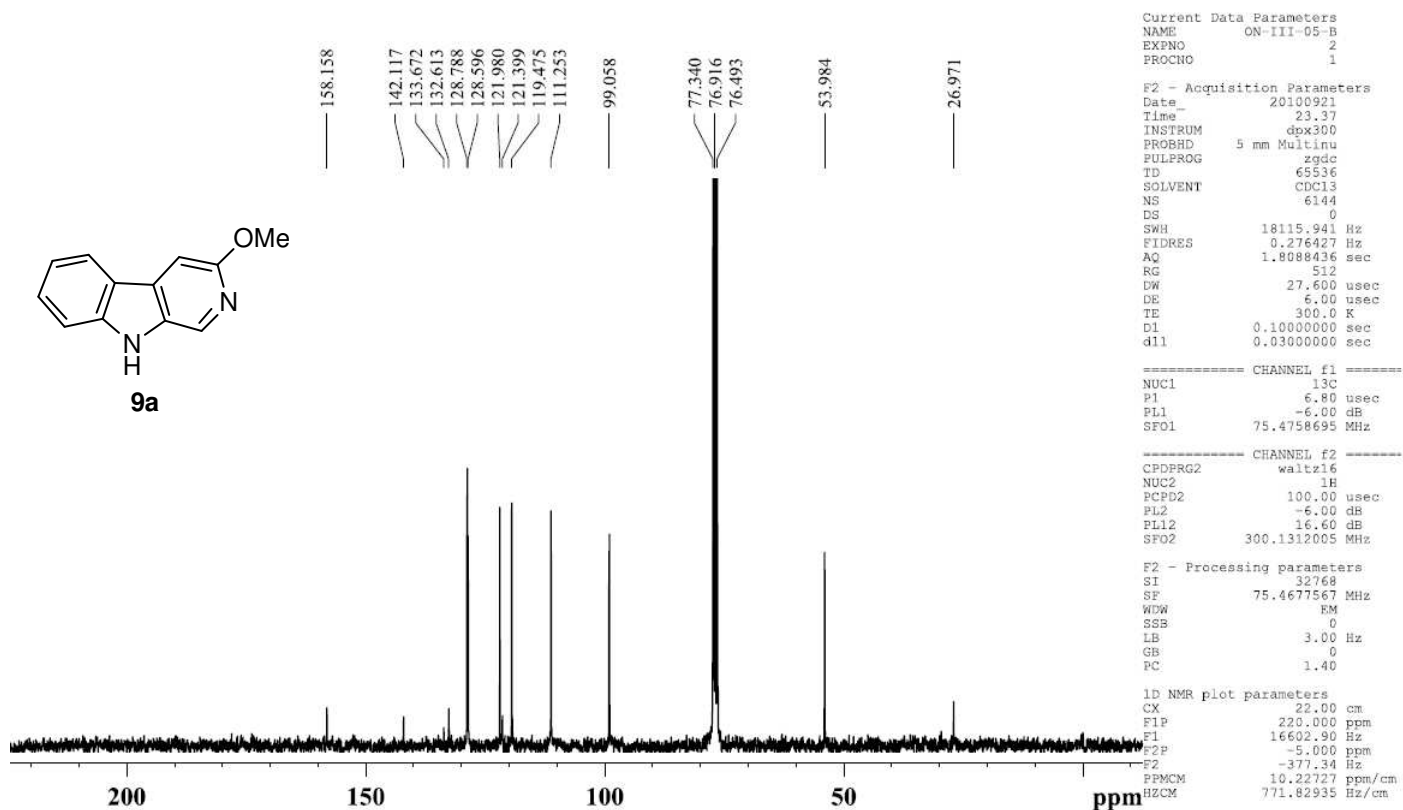

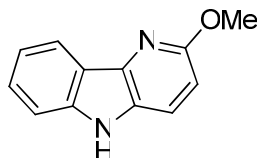

2-methoxy-5H-pyrido[3,2-b]indole (10a)

Proton Spectrum

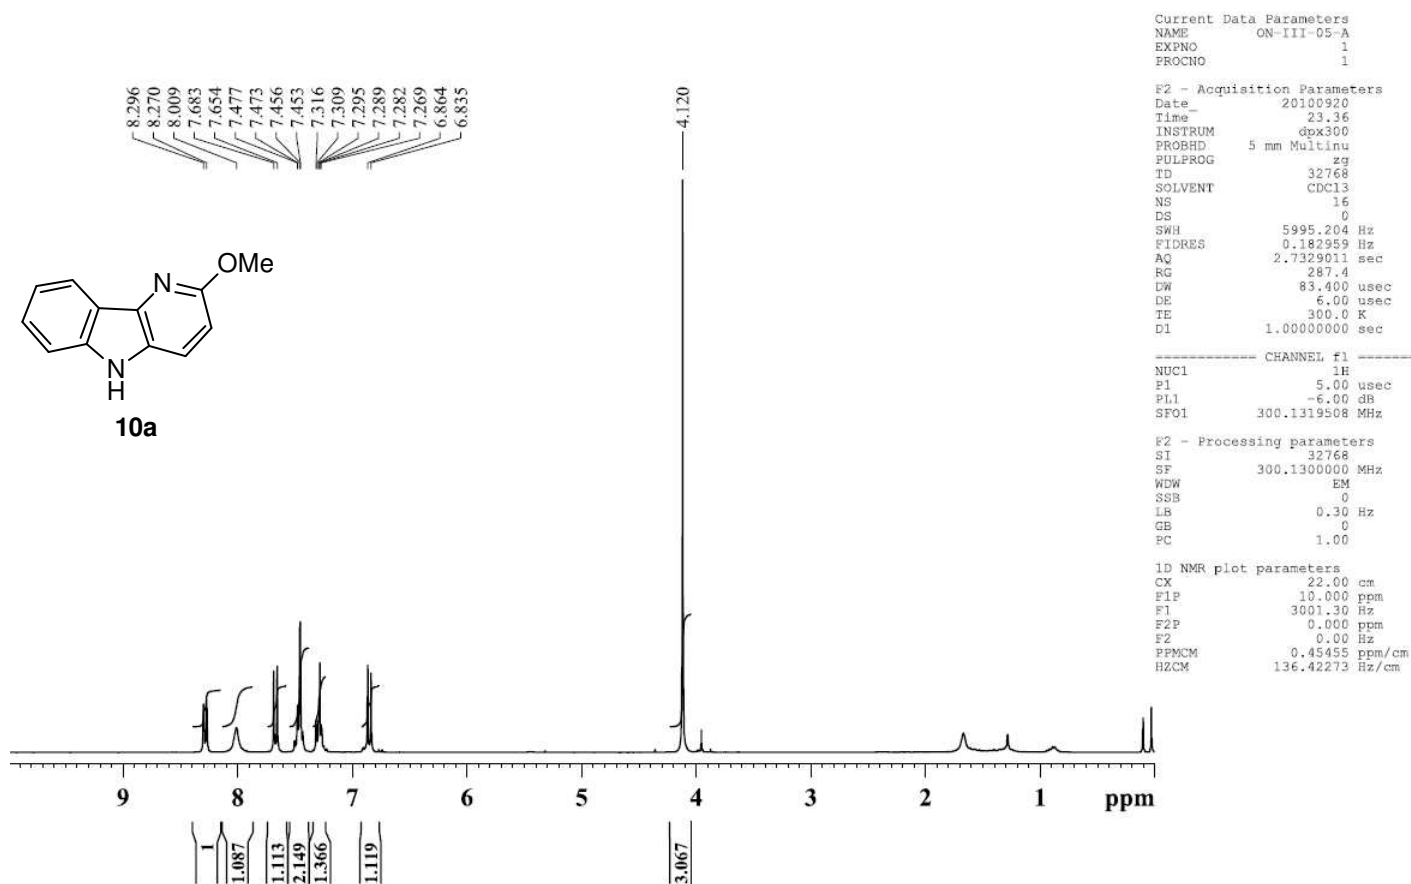

### Carbon Spectrum

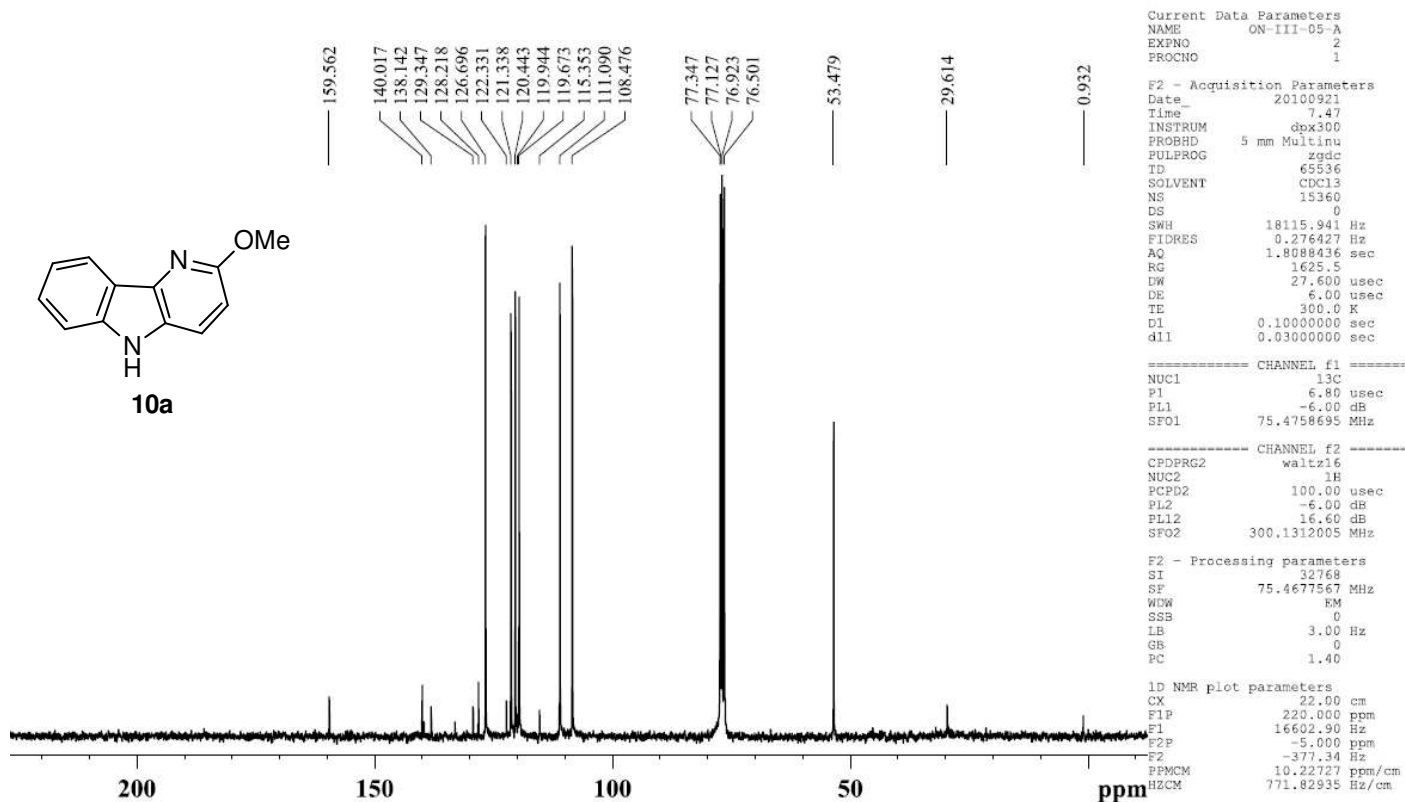

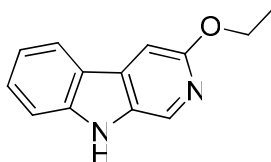

**3-ethoxy-9H-pyrido[3,4-b]indole (9b)**

**Proton Spectrum**

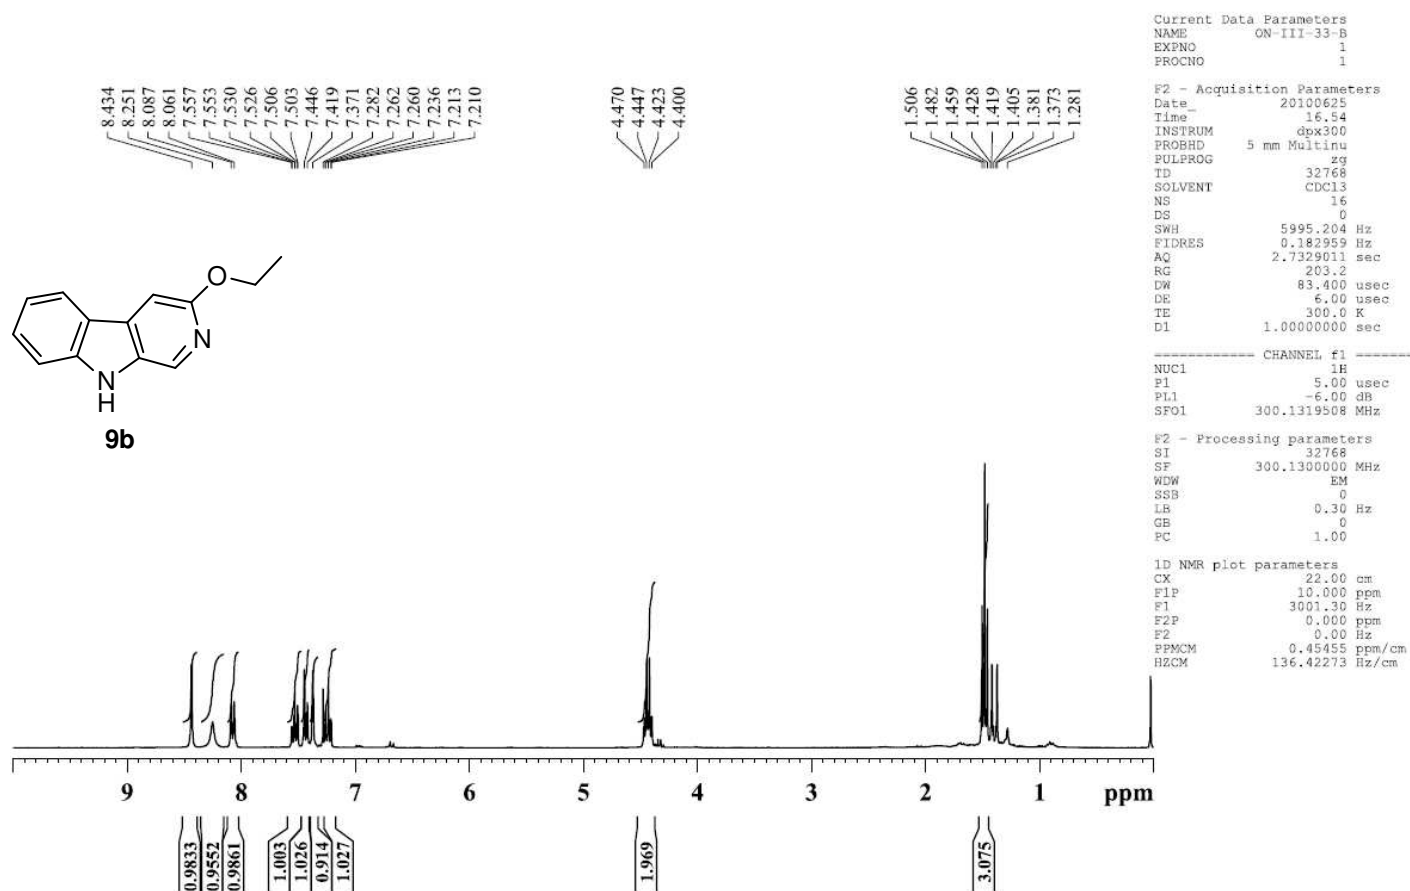

### Carbon Spectrum

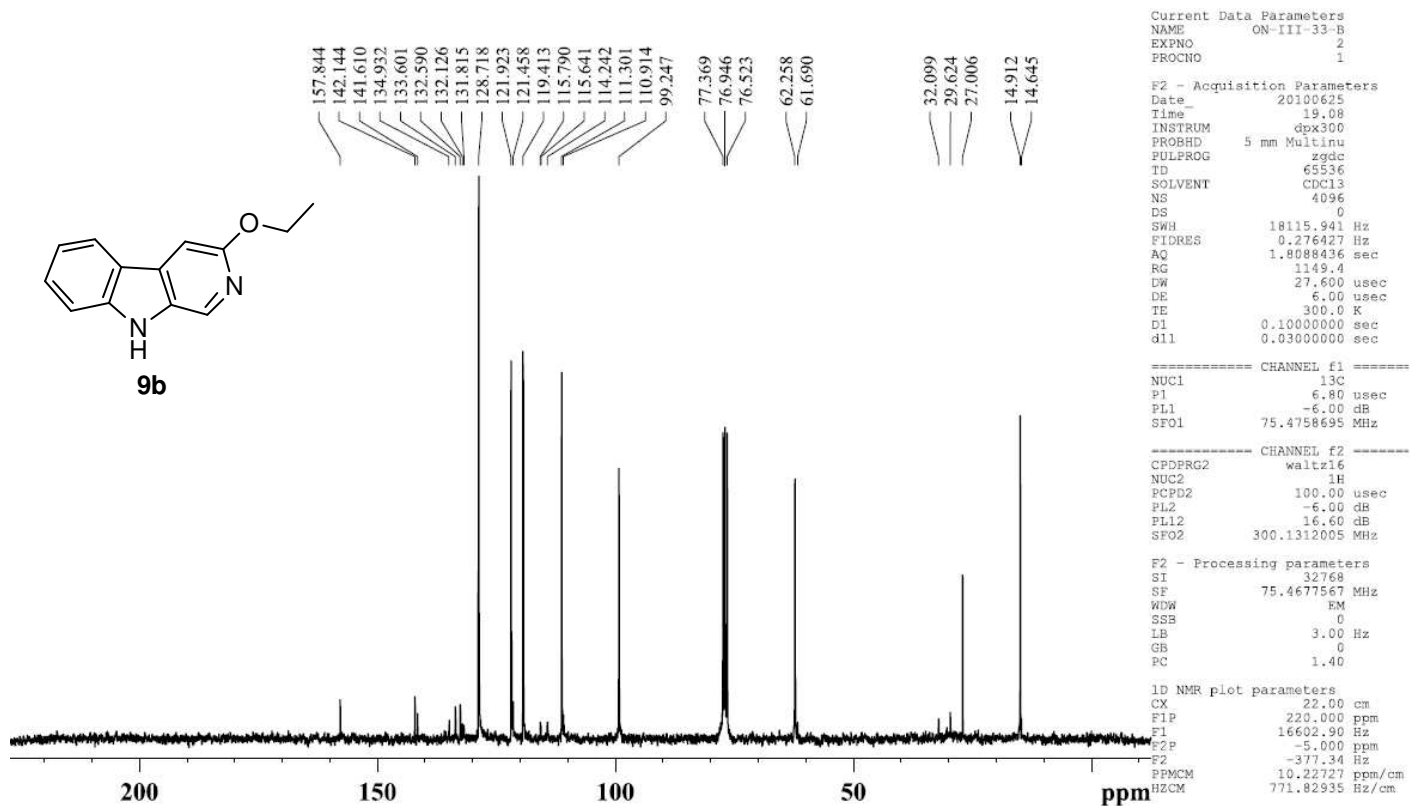

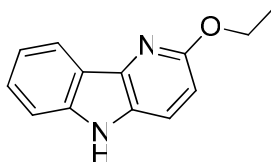

**2-Ethoxy-5H-pyrido[3,2-b]indole (10b)**

**Proton Spectrum**

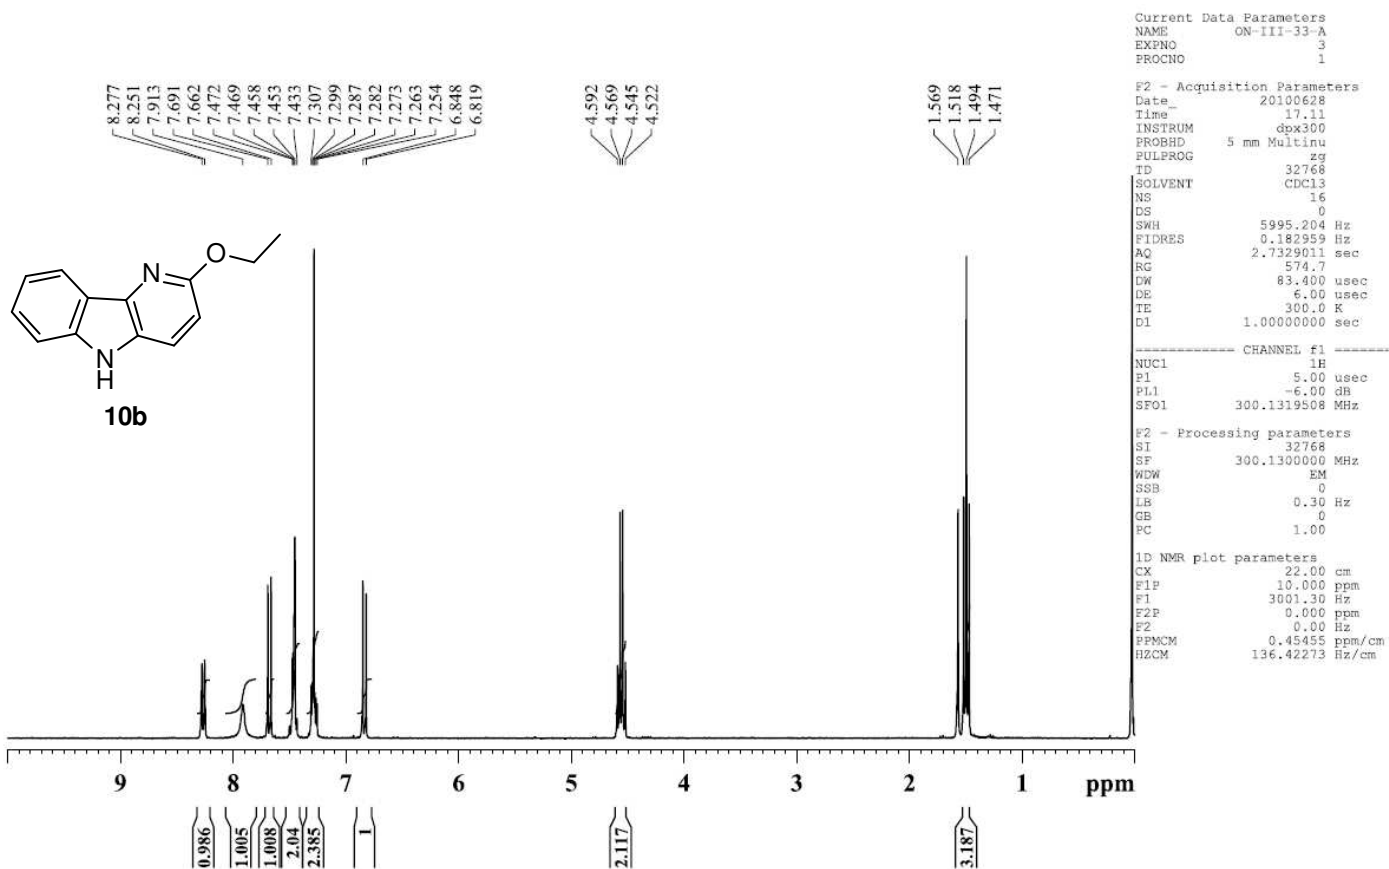



### Carbon Spectrum

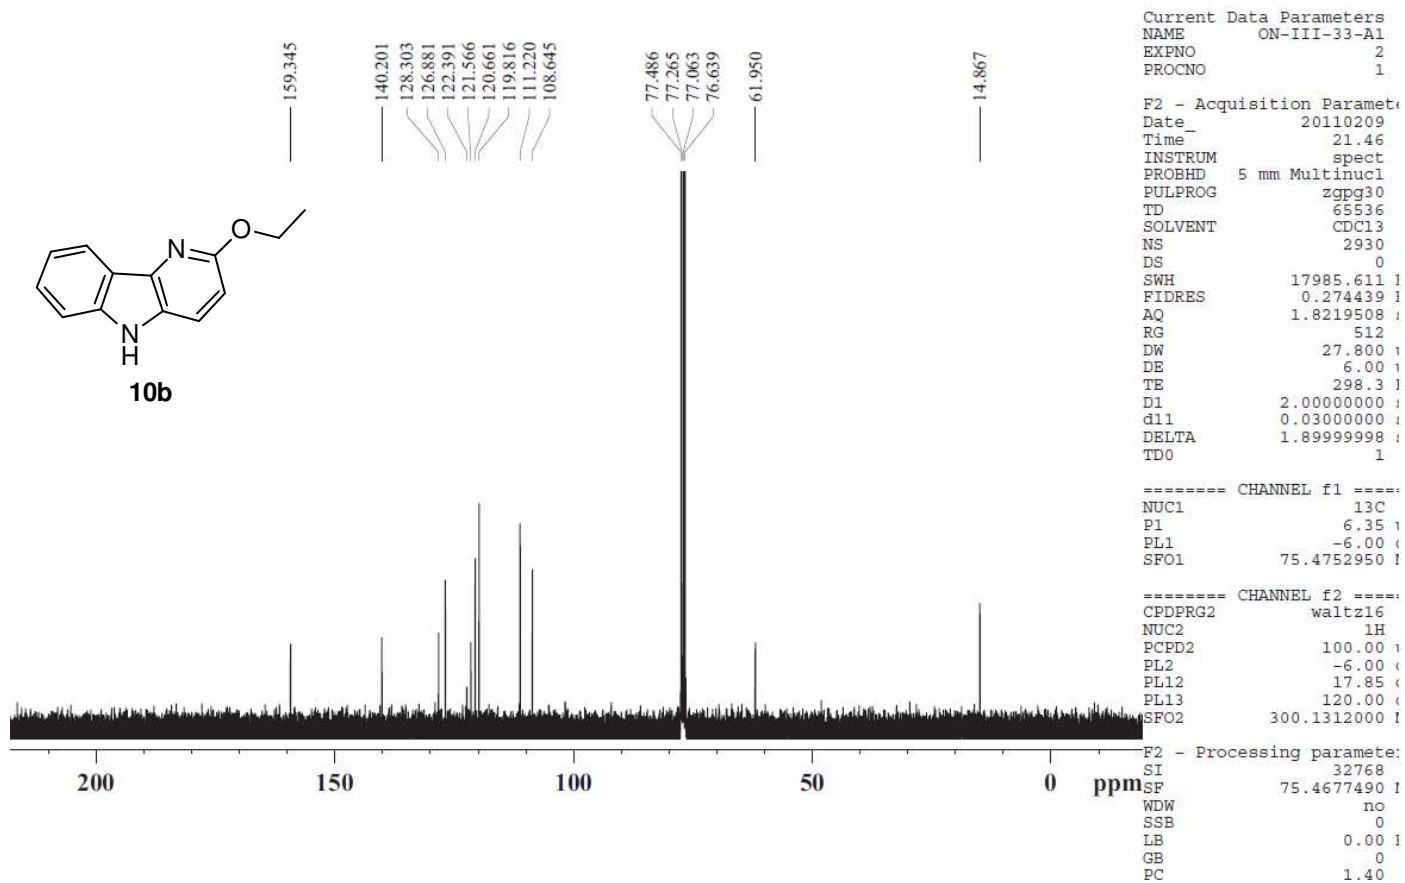

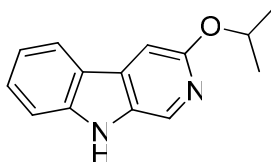

3-isopropoxy-9H-pyrido[3,4-b]indole (9c)

Proton Spectrum

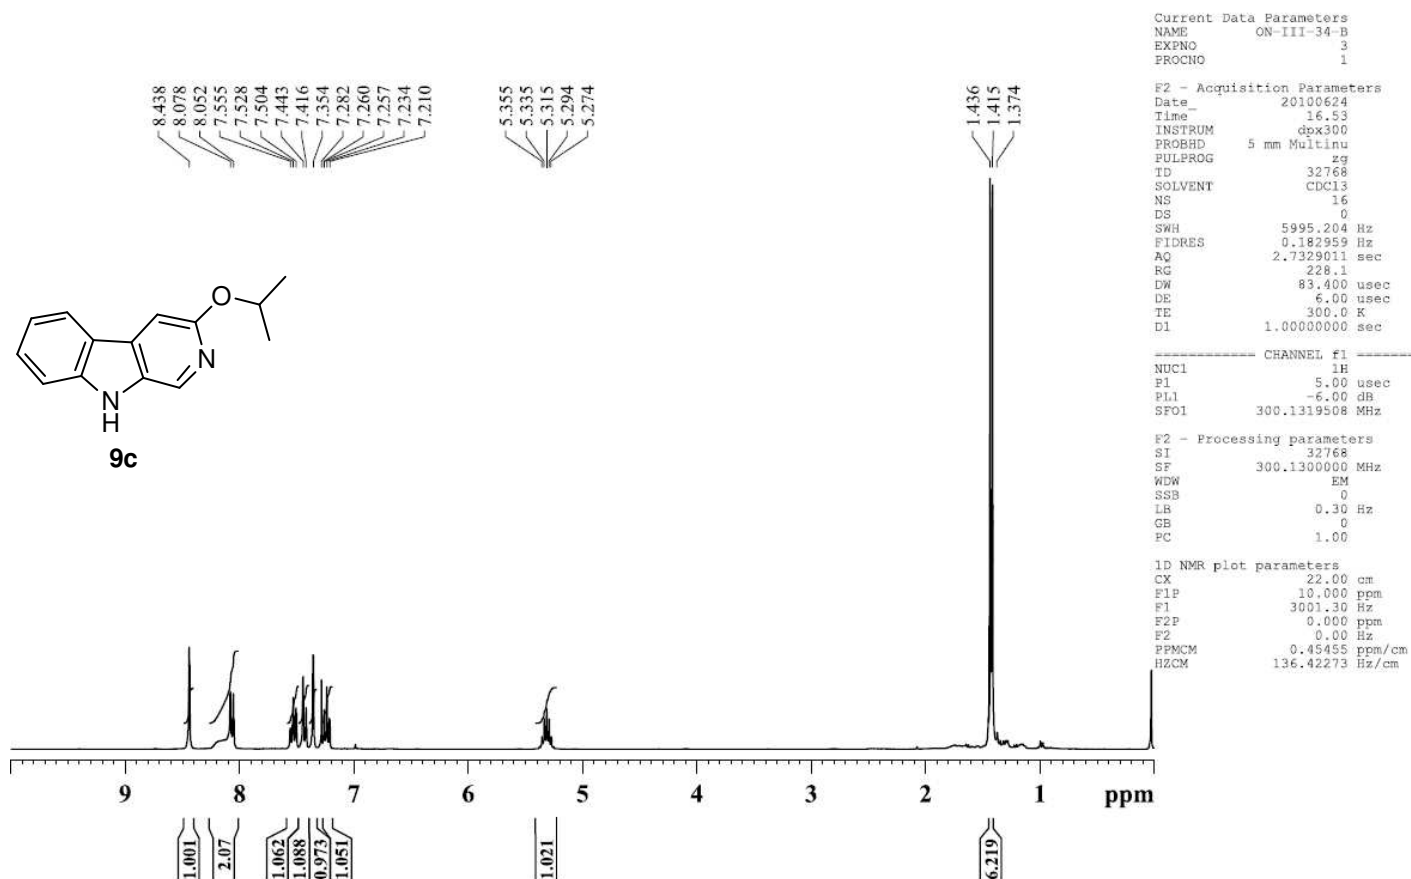

### Carbon Spectrum

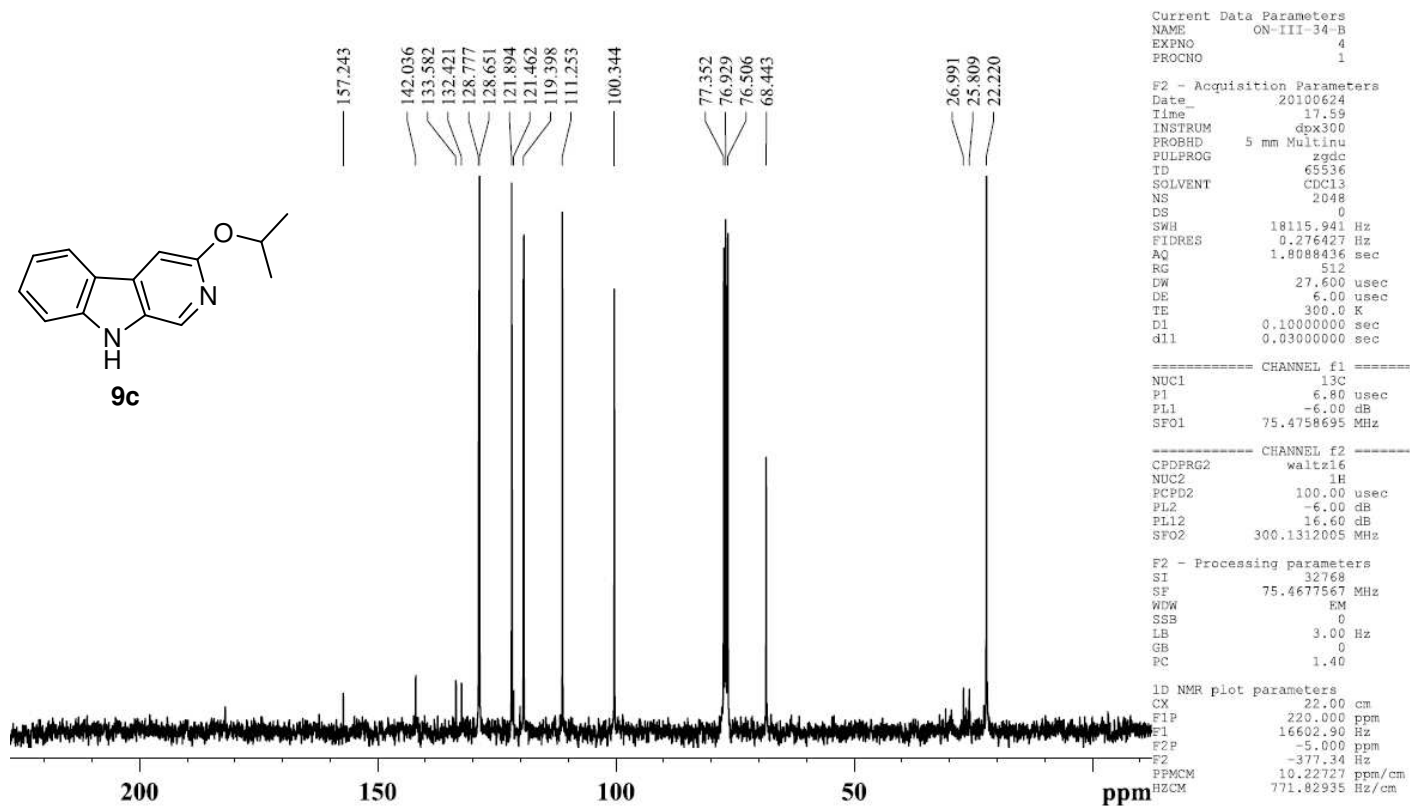

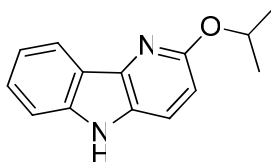

2-isopropoxy-5H-pyrido[3,2-b]indole (10c)

Proton Spectrum

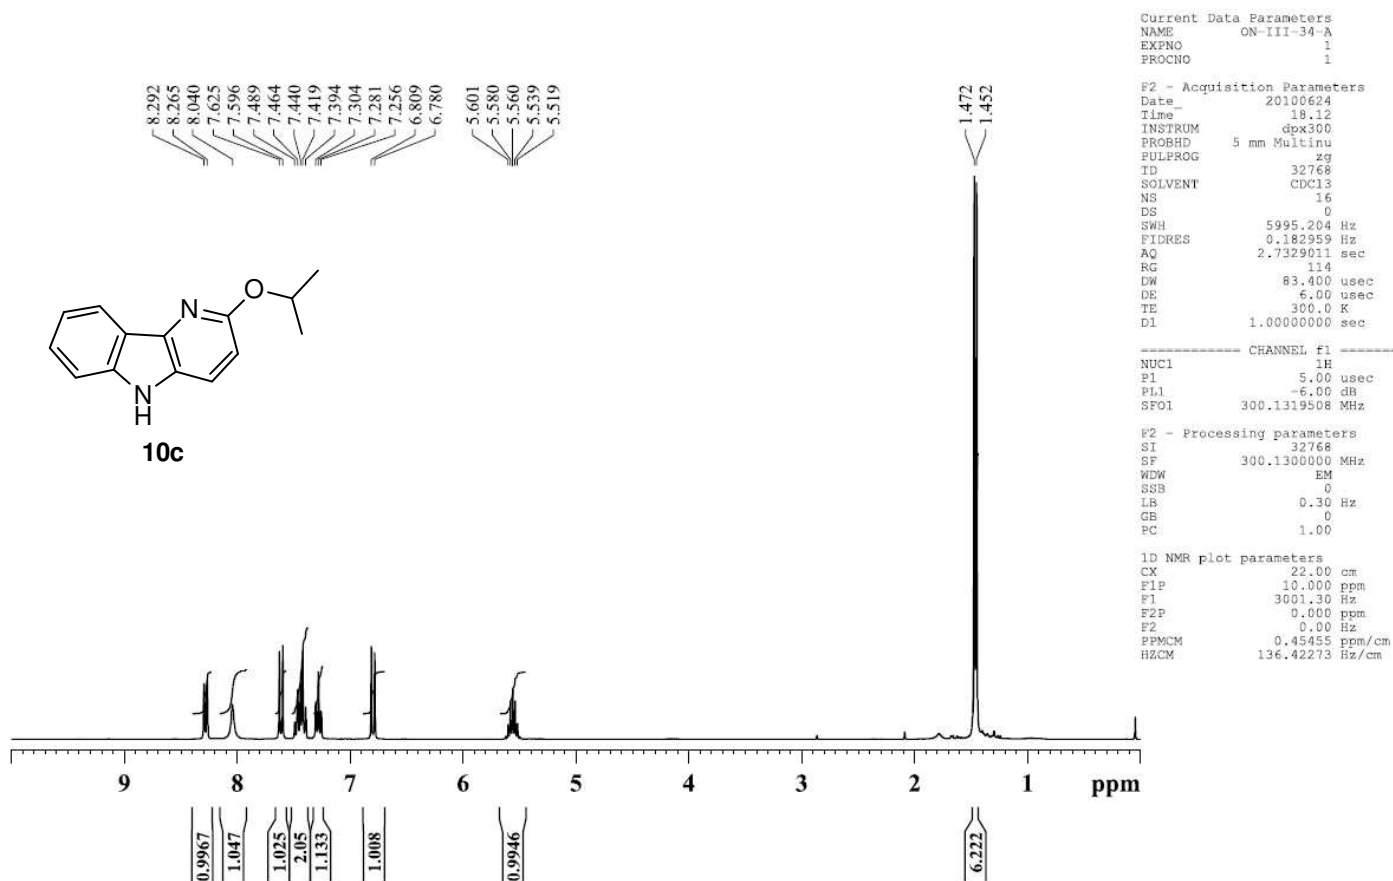

### Carbon Spectrum

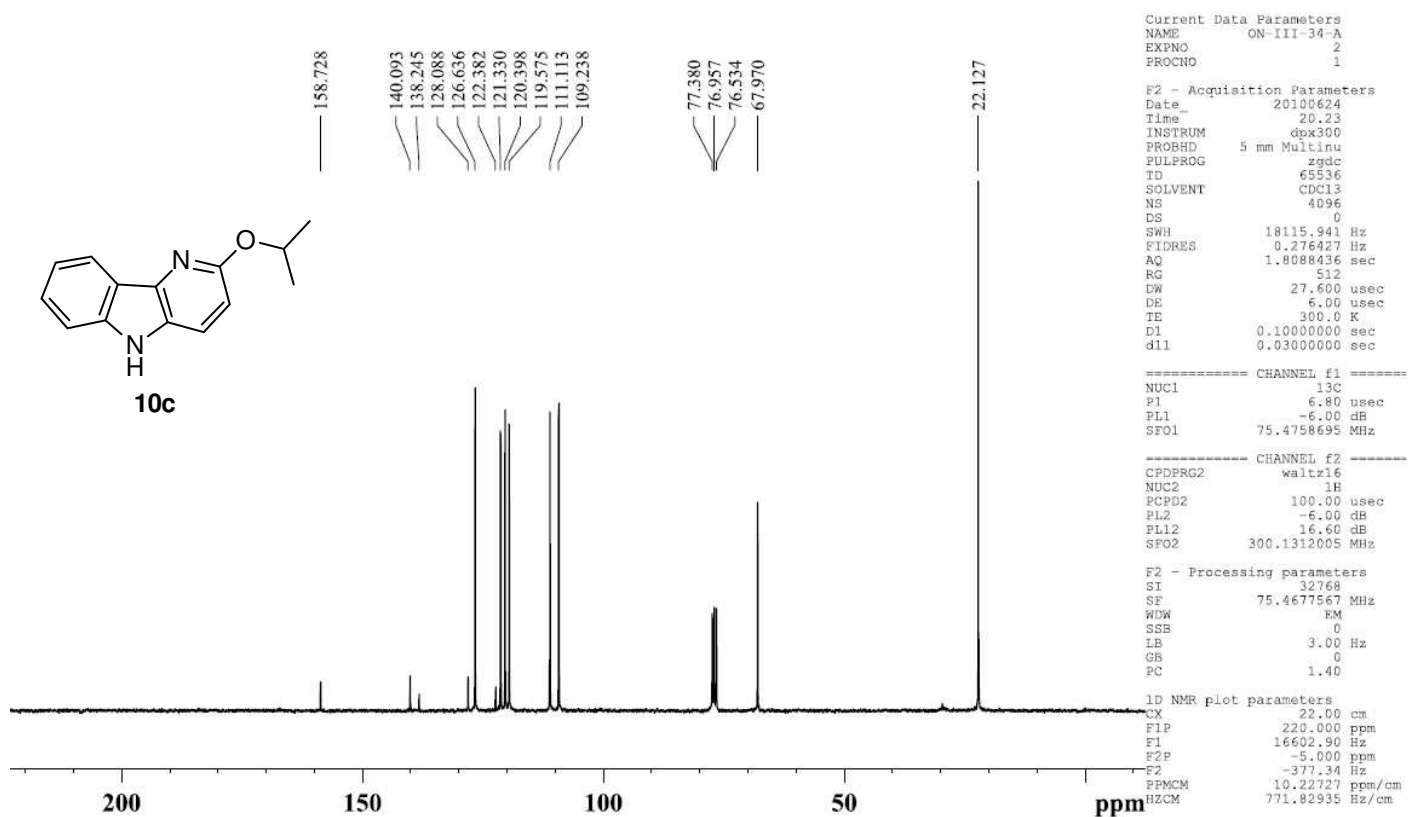

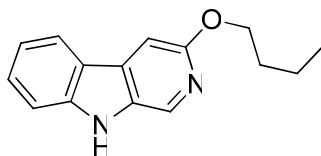

**3-butoxy-9H-pyrido[3,4-b]indole (9d)**

**Proton Spectrum**

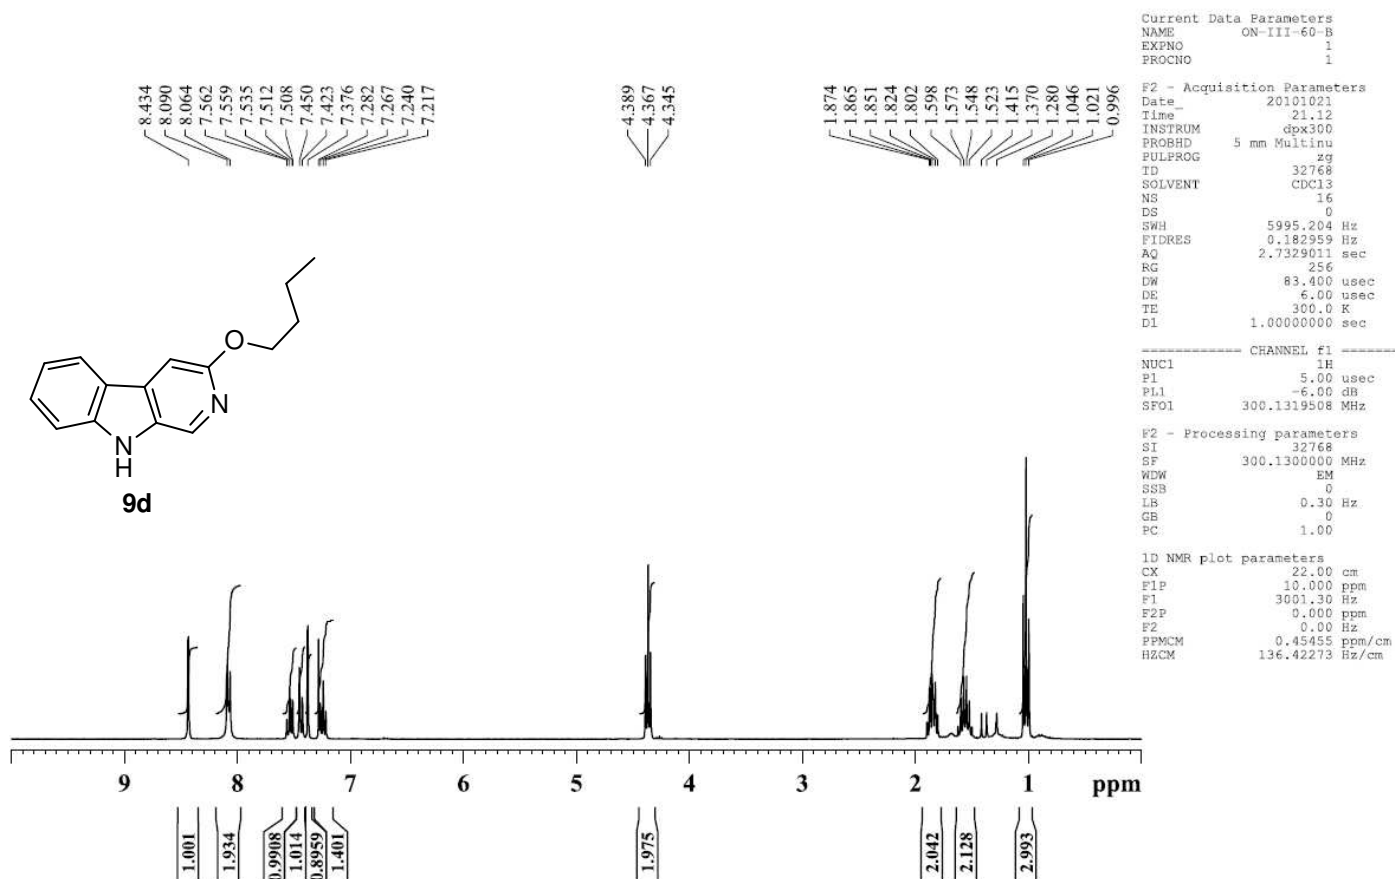

### Carbon Spectrum

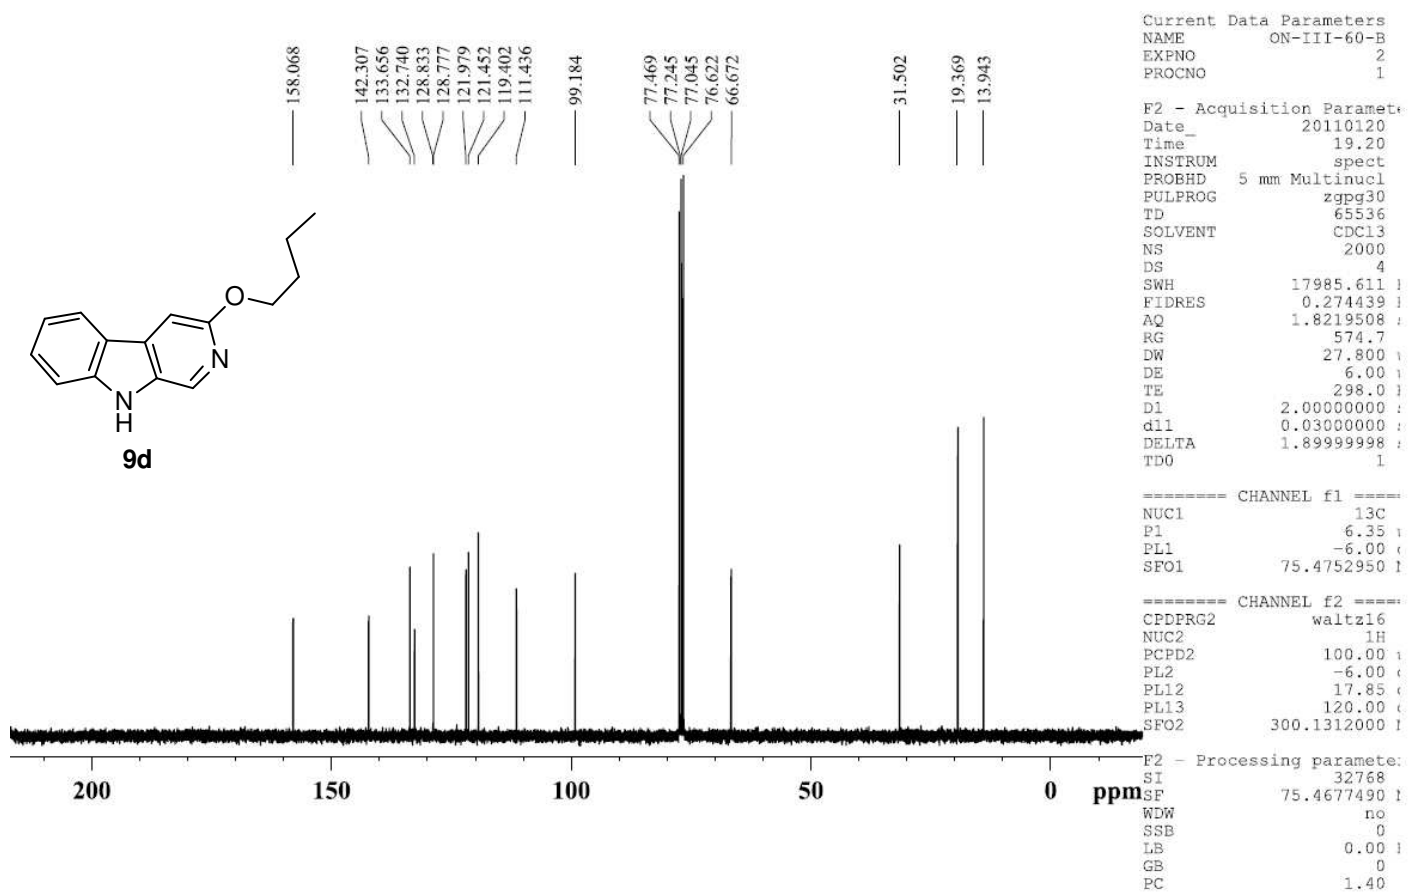

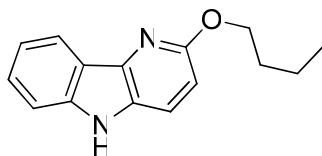

**2-butoxy-5H-pyrido[3,2-b]indole (10d)**

**Proton Spectrum**

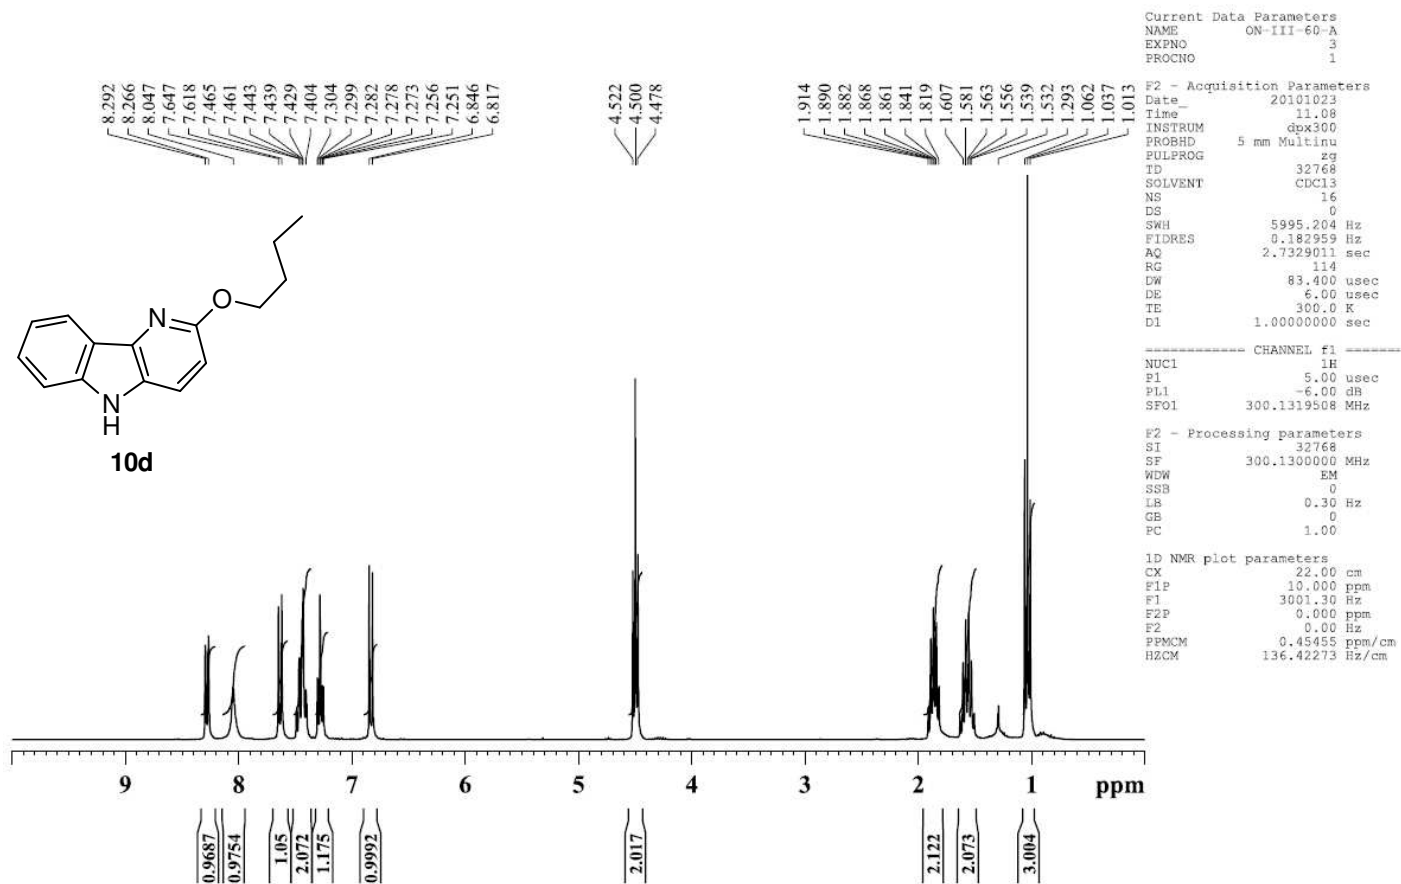



### Carbon Spectrum

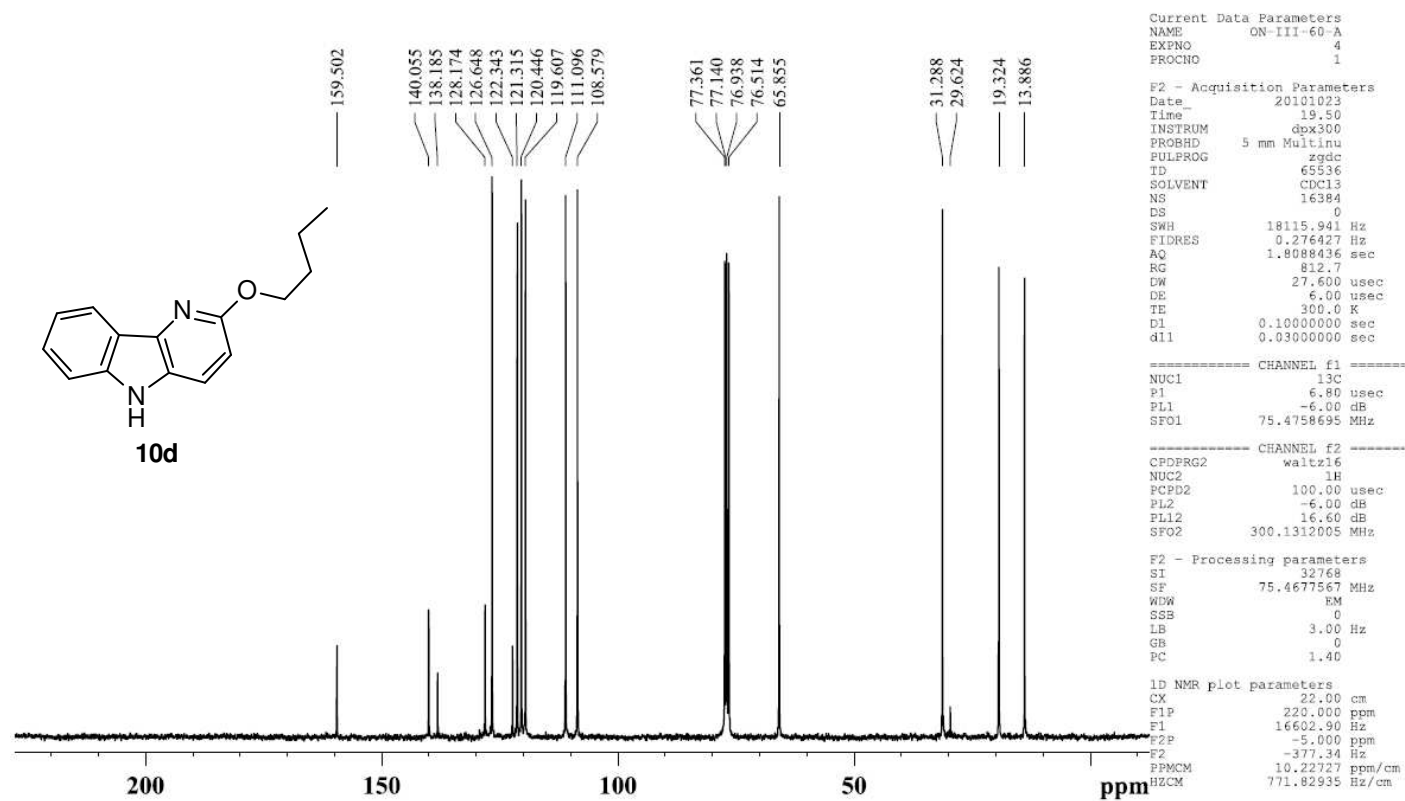

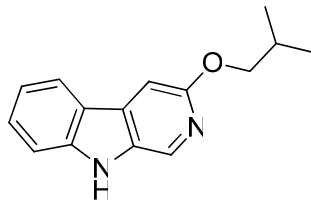

**3-isobutoxy-9H-pyrido[3,4-b]indole (9e)**

**Proton Spectrum**

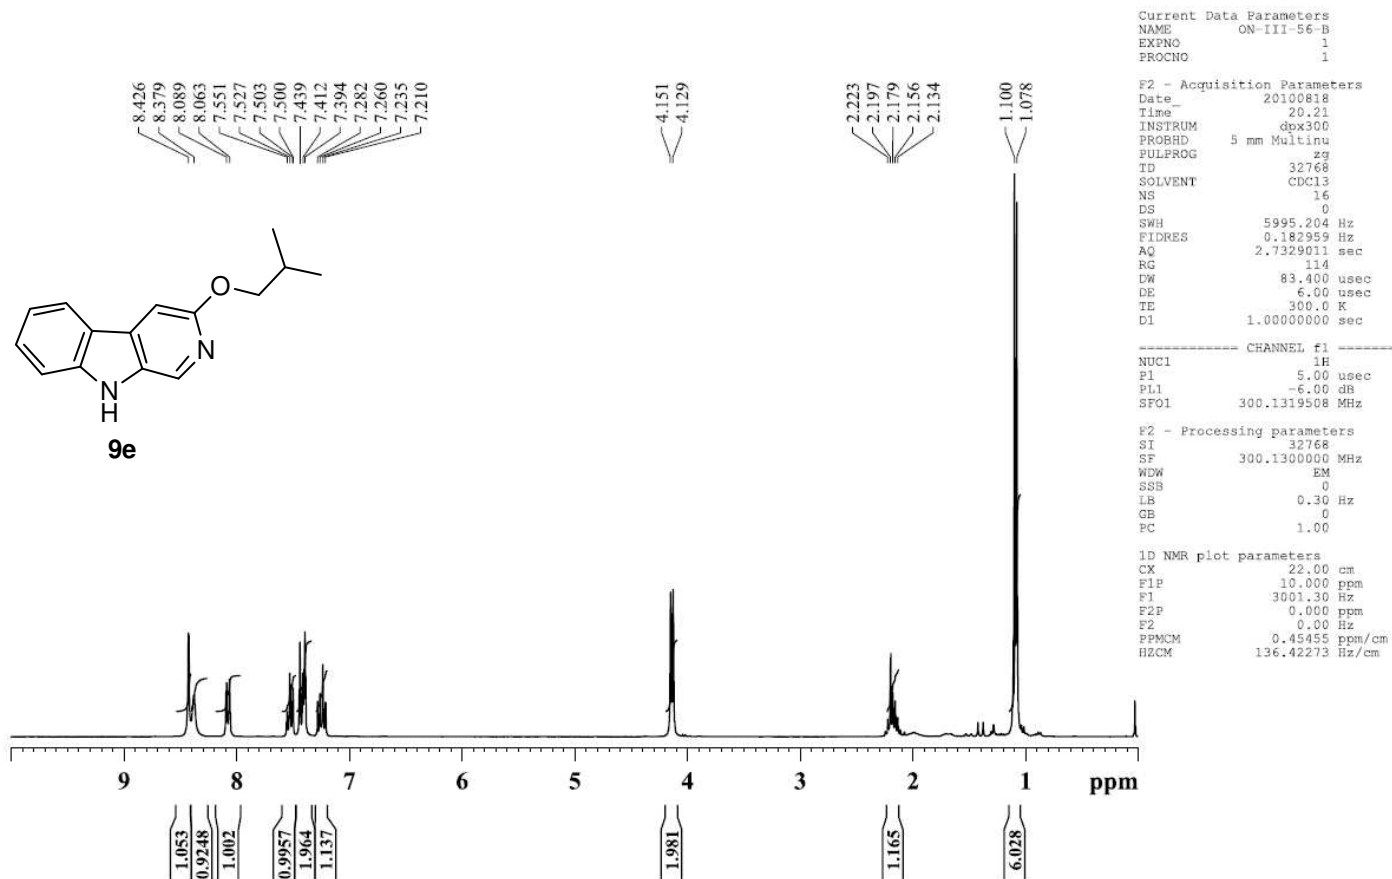

### Carbon Spectrum

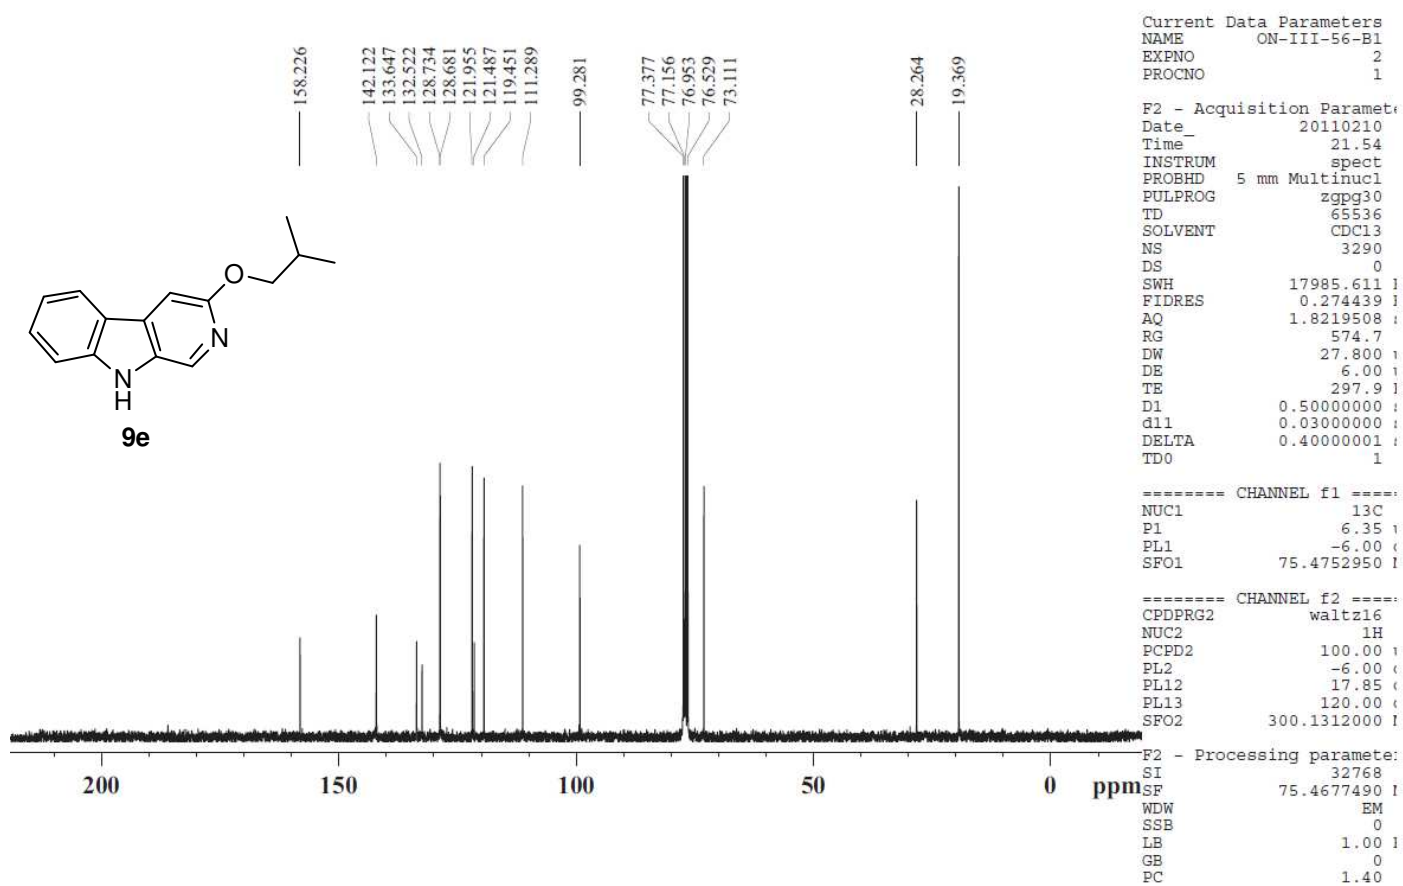

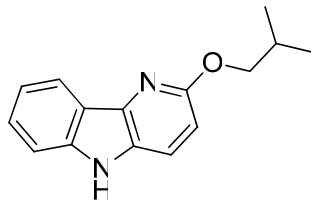

**2-isobutoxy-5H-pyrido[3,2-b]indole (10e)**

**Proton Spectrum**

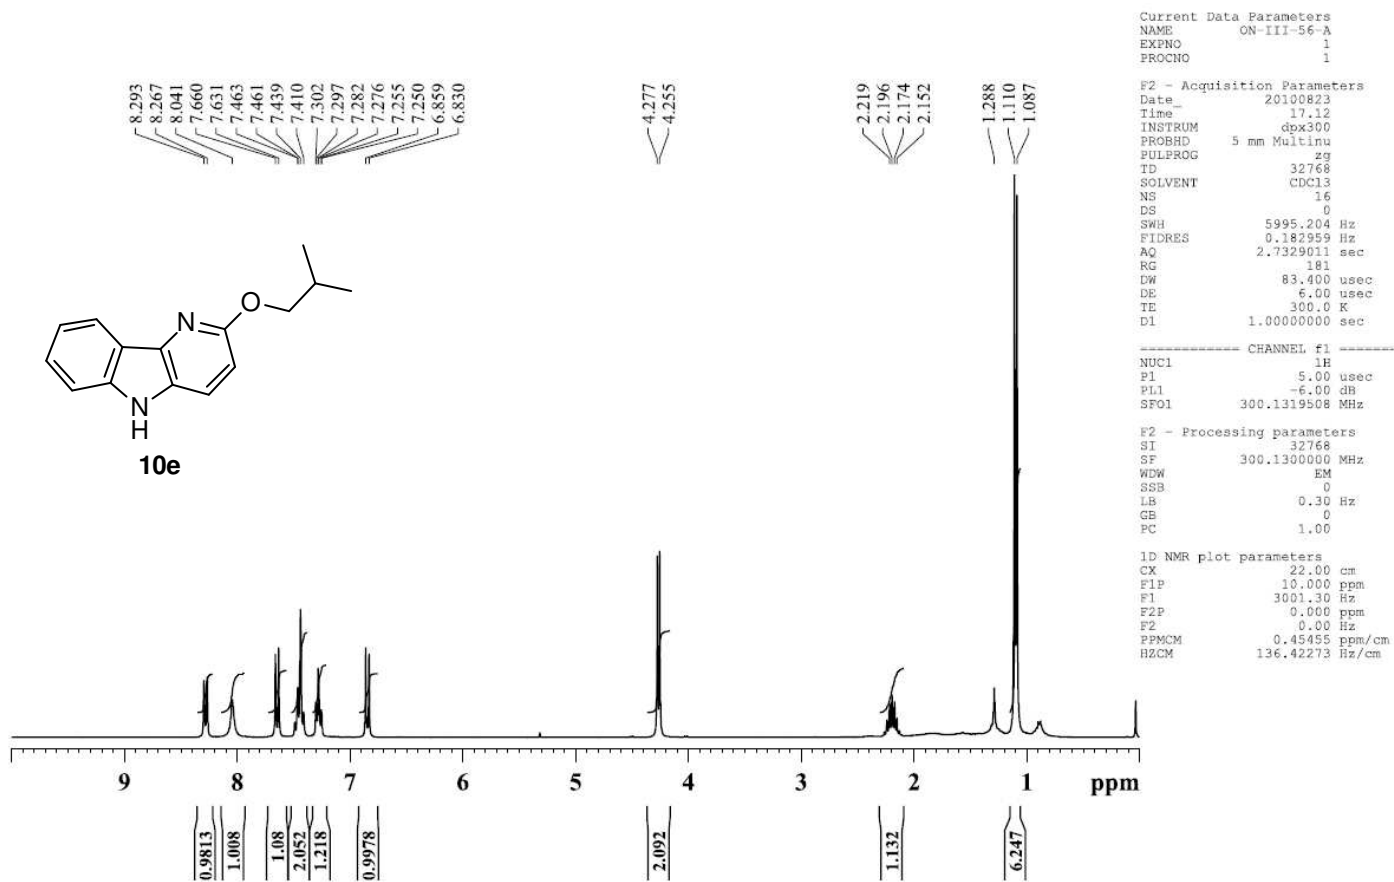

### Carbon Spectrum

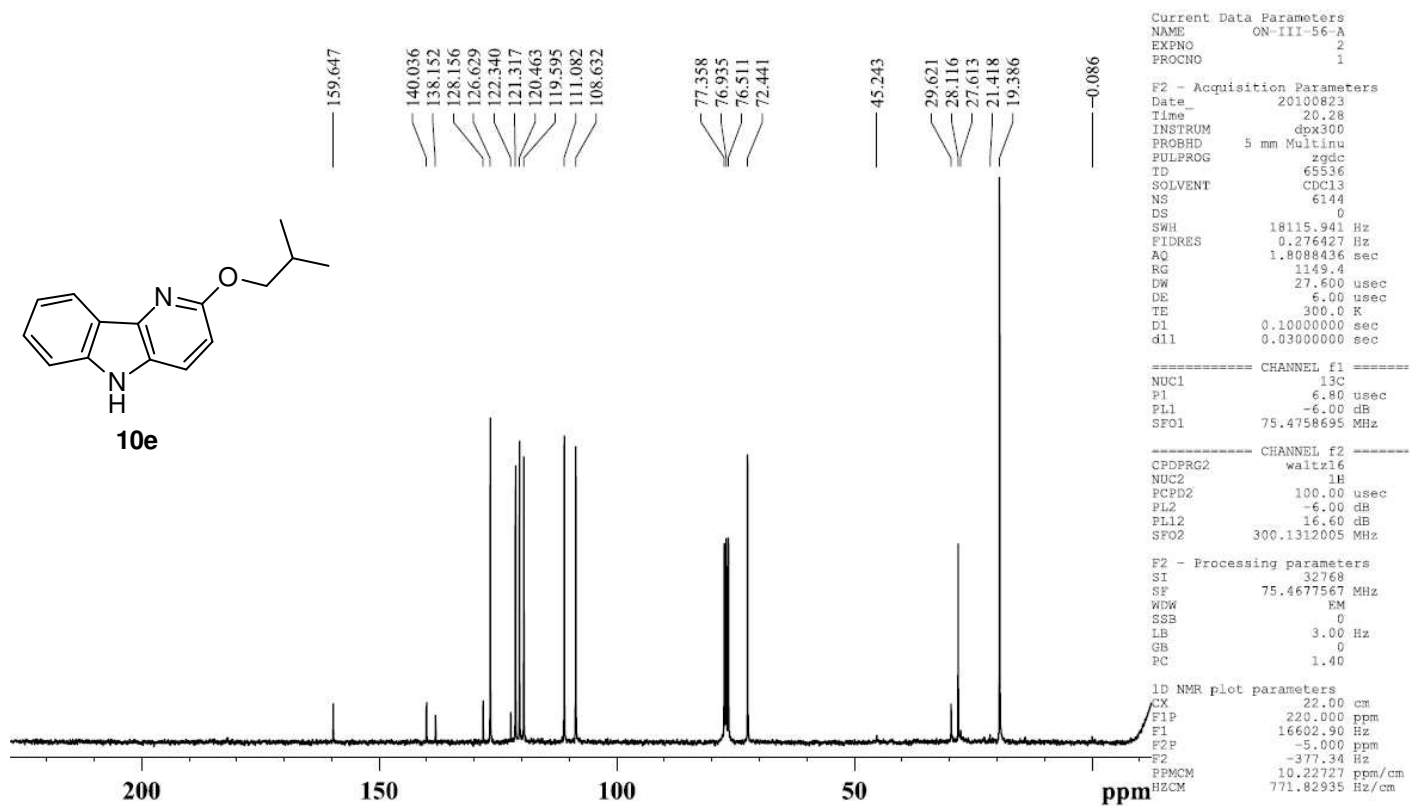

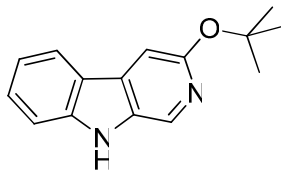

**3-(tert-butoxy)-9H-pyrido[3,4-b]indole (9f)**

**Proton Spectrum**

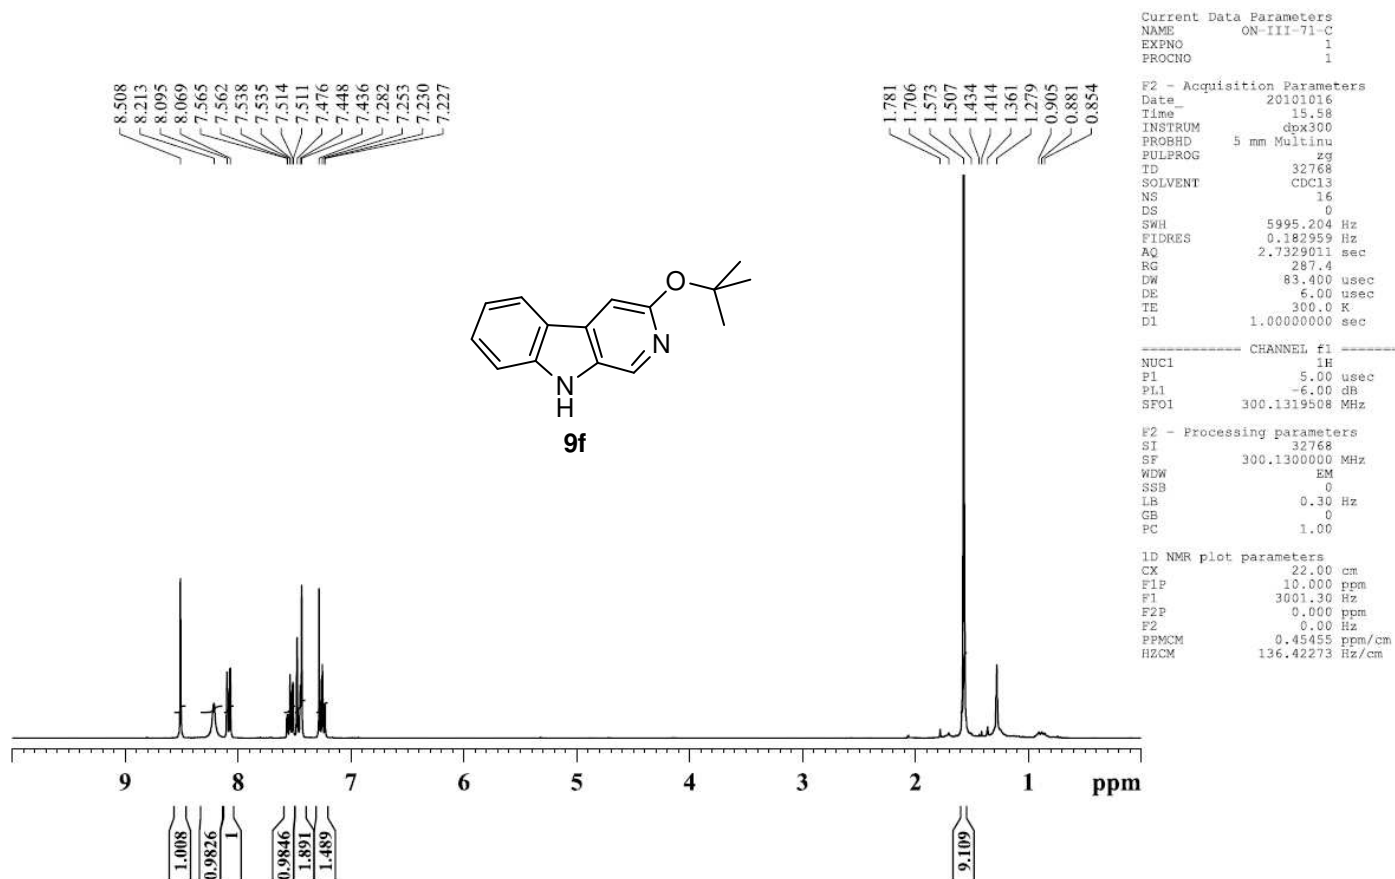

### Carbon Spectrum

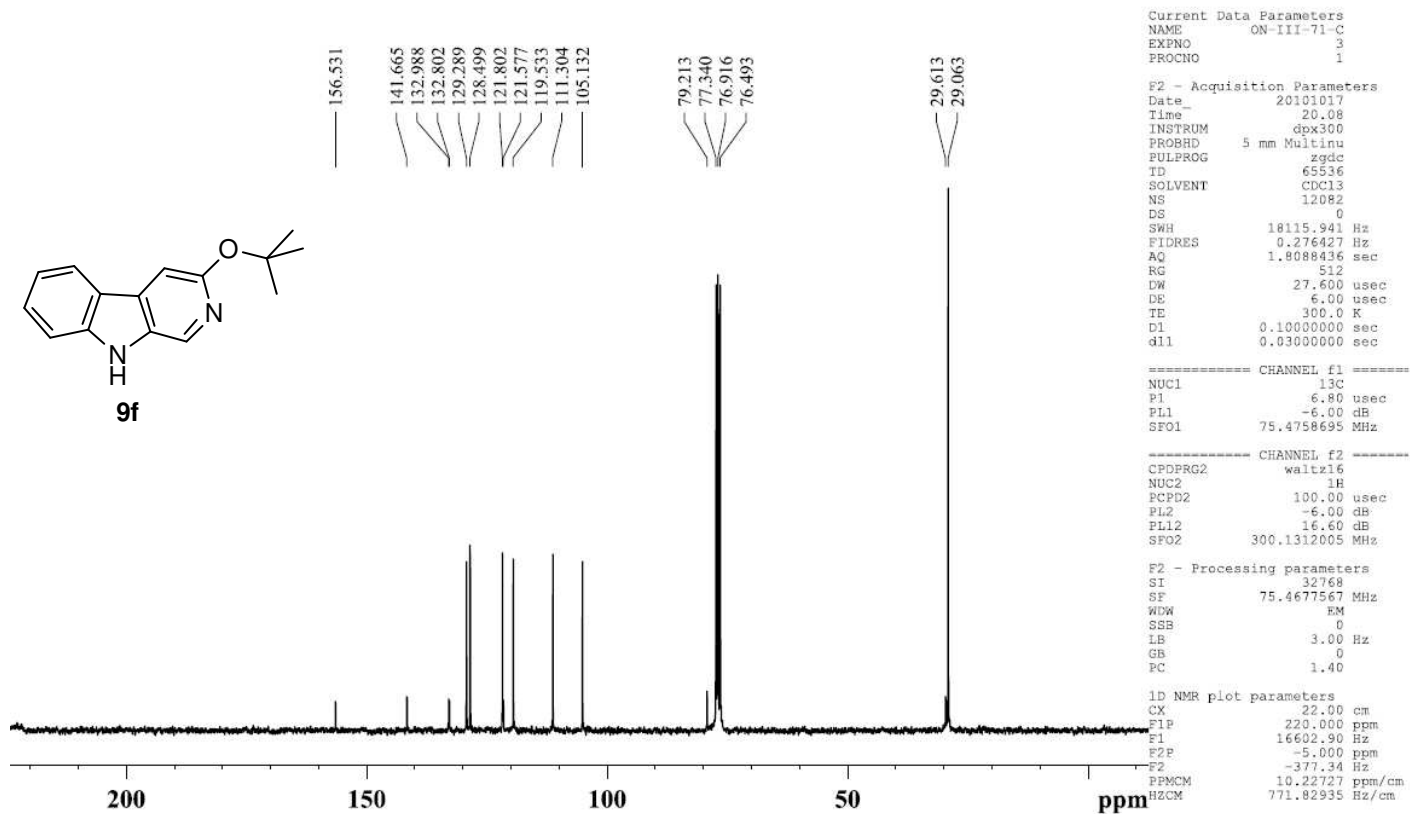

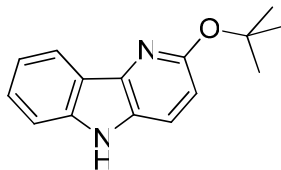

**2-(*tert*-butoxy)-5H-pyrido[3,2-*b*]indole (10f)**

### Proton Spectrum

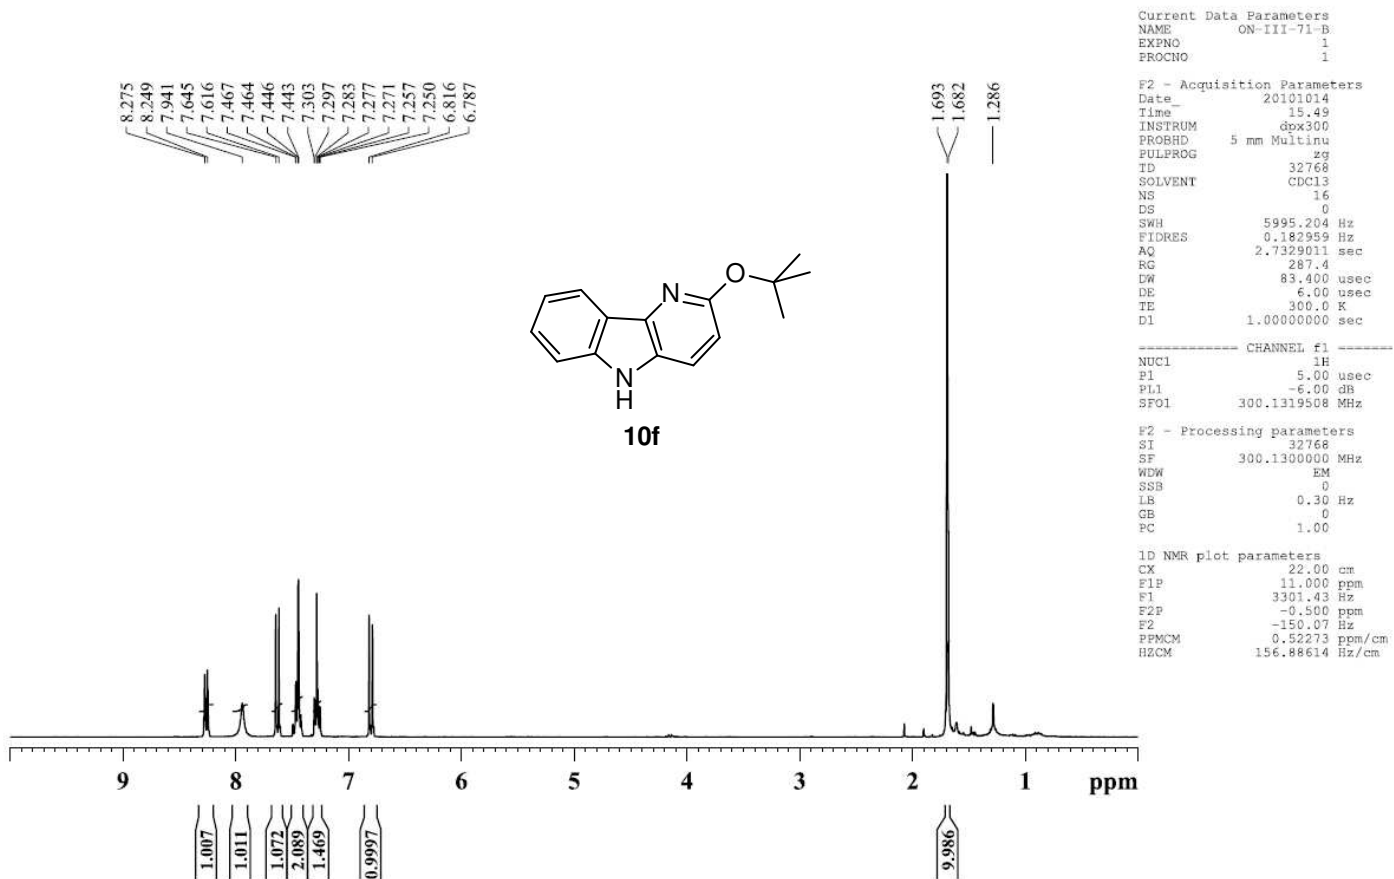



### Carbon Spectrum

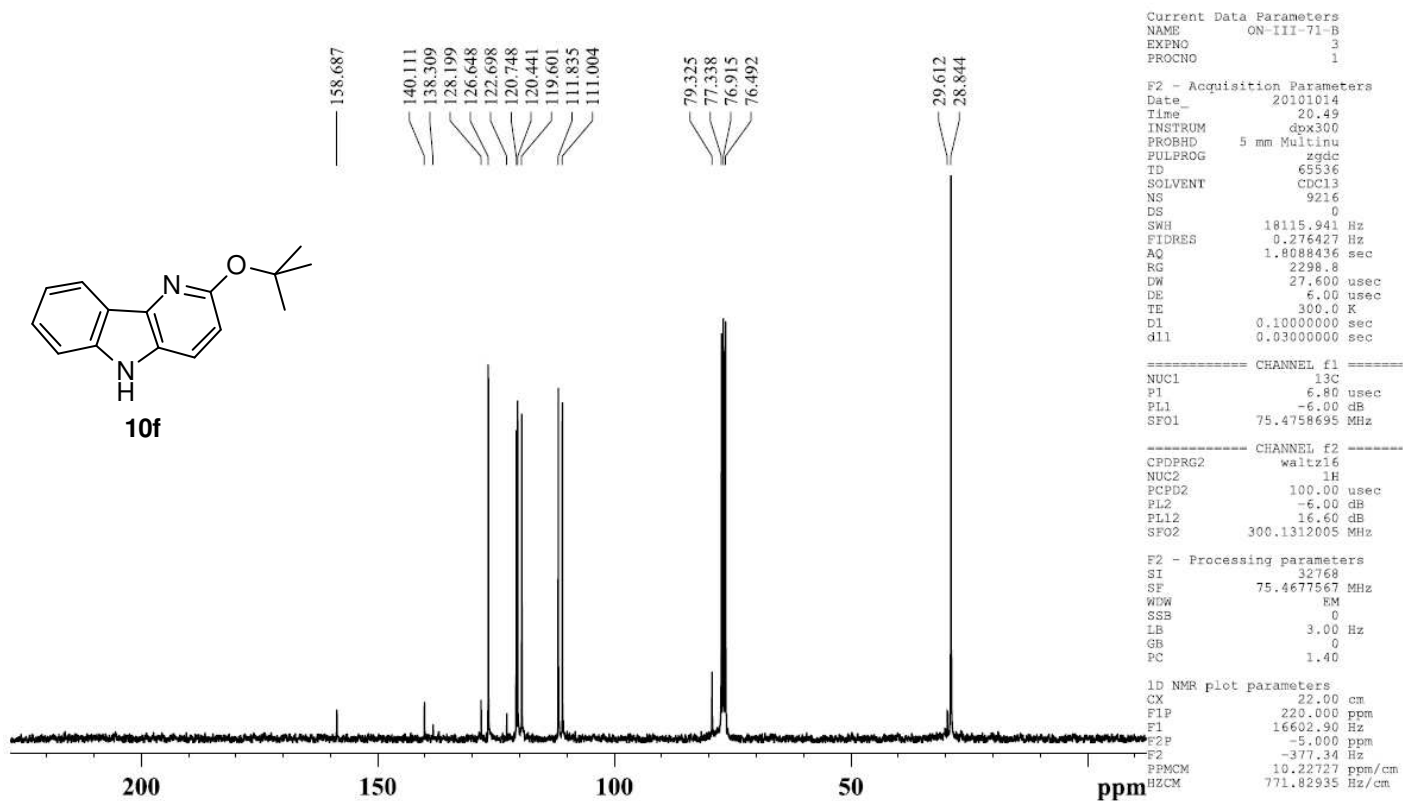

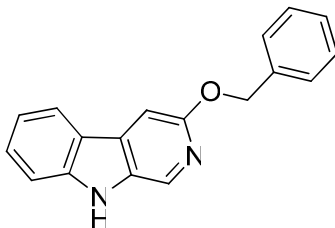

3-(benzyloxy)-9H-pyrido[3,4-b]indole (9g)

Proton Spectrum

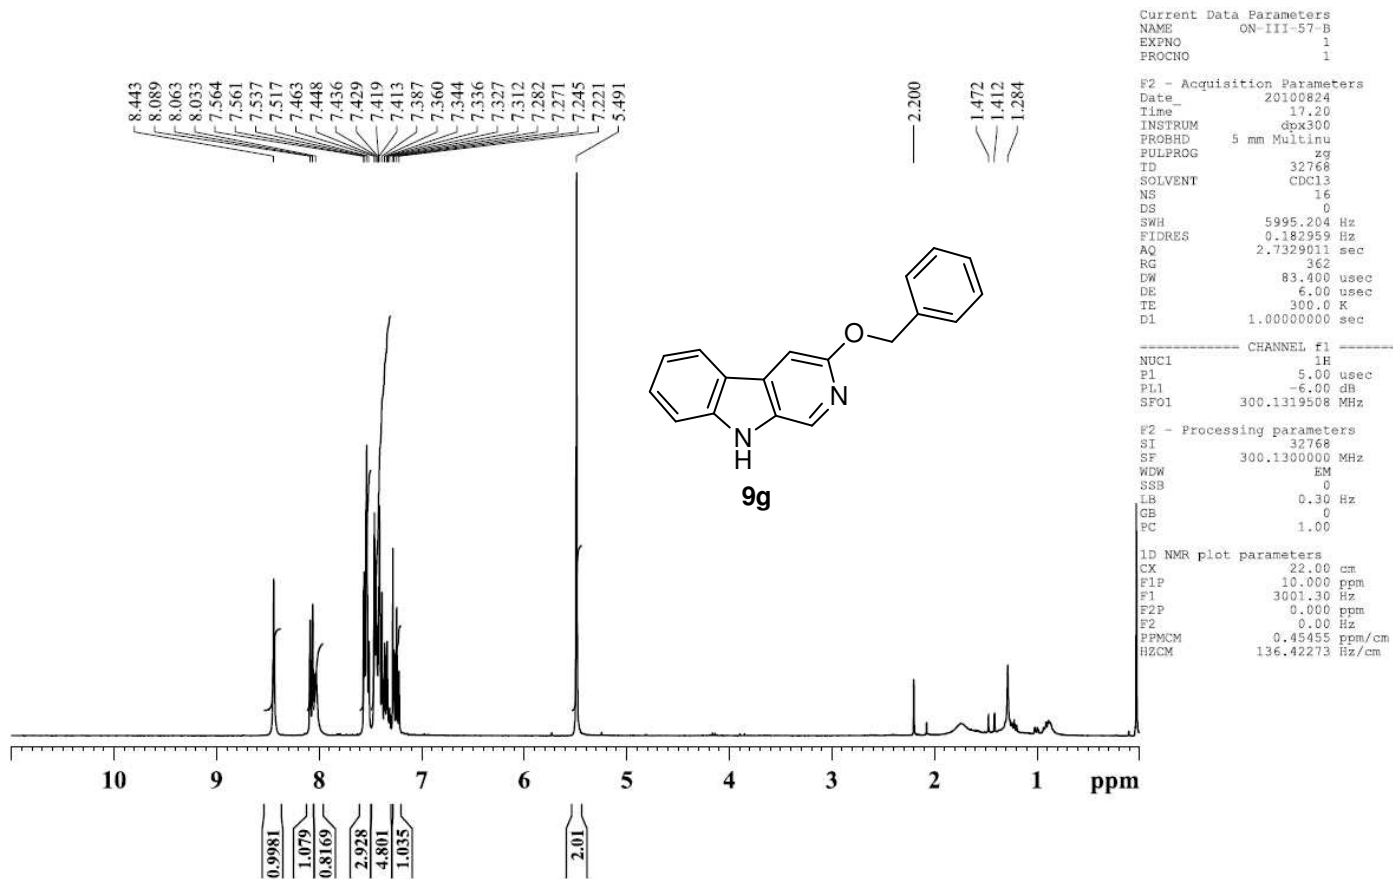

### Carbon Spectrum

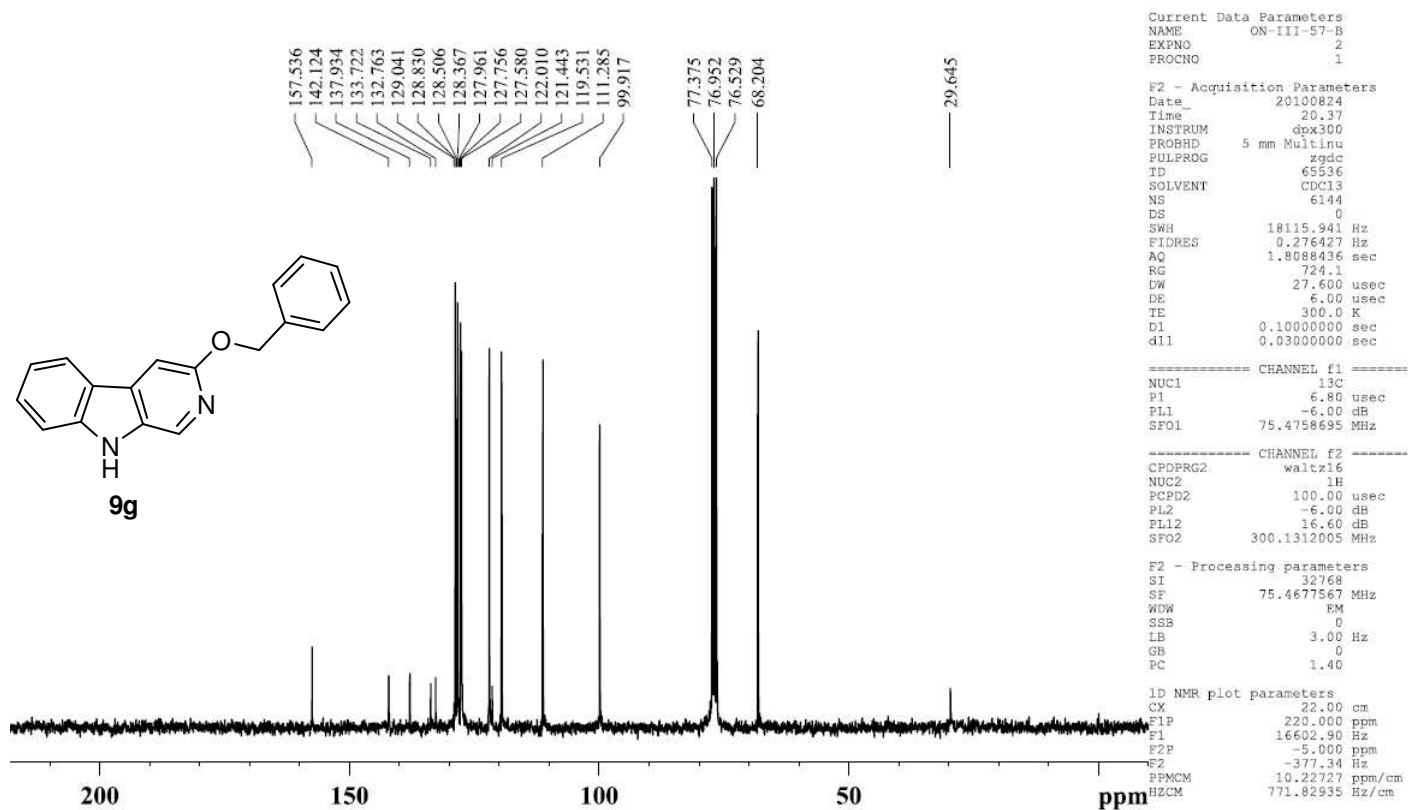

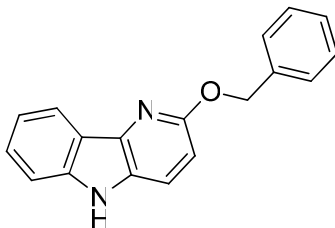

**2-(benzyloxy)-5H-pyrido[3,2-b]indole (10g)**

**Proton Spectrum**

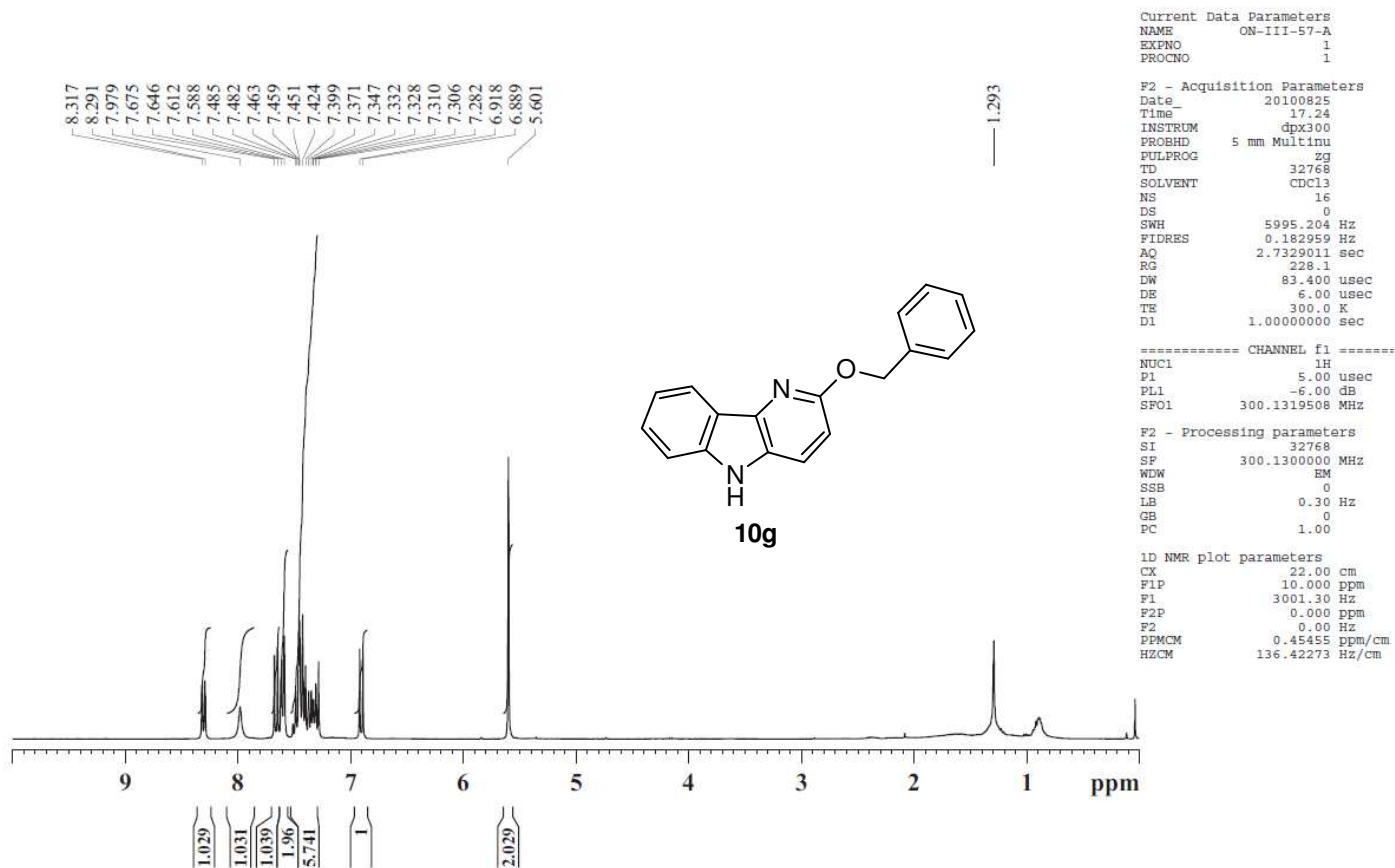

Carbon Spectrum

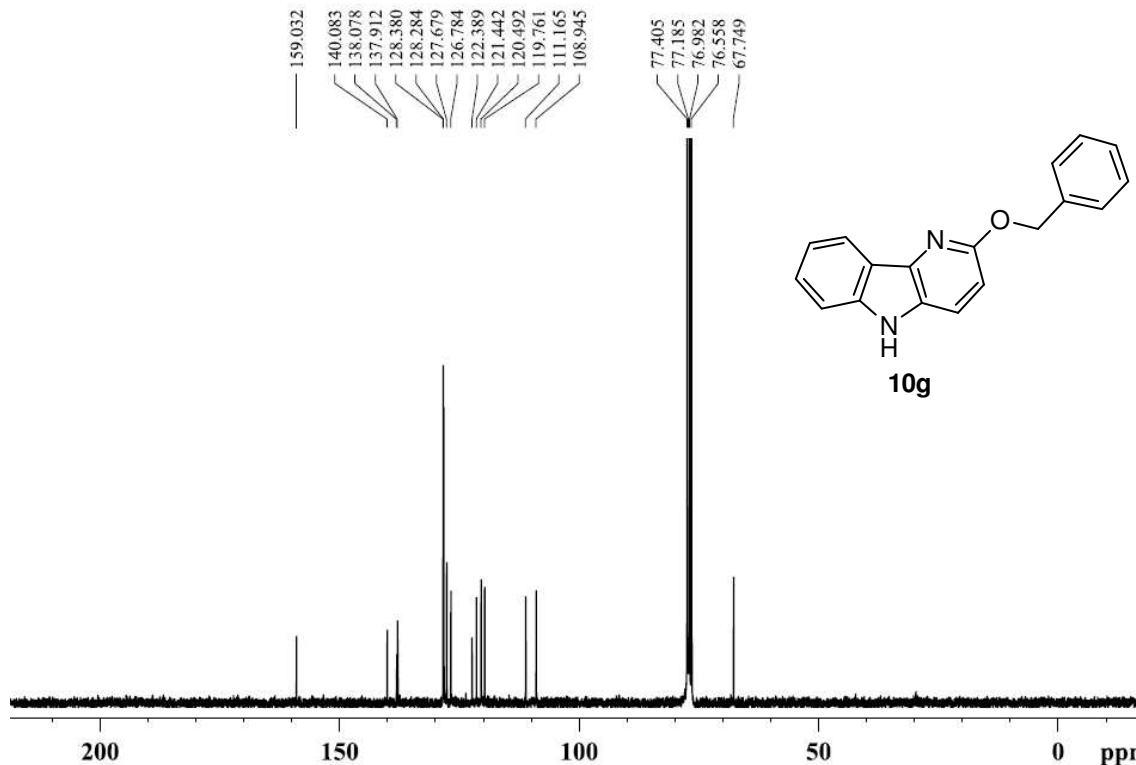

```

Current Data Parameters
NAME      ON-III-57-A
EXPNO    4
PROCNO   1

F2 - Acquisition Parameters
Date_    20110121
Time     20.13
INSTRUM spect
PROBHD   5 mm Multinucl
PULPROG zgpg30
TD       65536
SOLVENT  CDCl3
NS       2894
DS       4
SWH      17985.611 MHz
FIDRES   0.274439 Hz
AQ       1.8219508 sec
RG       724.1
DW       27.800 nsec
DE       6.00 nsec
TE       298.0 K
D1       2.00000000 sec
d11      0.03000000 sec
DELTA    1.89999998 sec
TDO      1

===== CHANNEL f1 =====
NUC1     13C
P1       6.35 nsec
PL1      -6.00 dB
SFO1     75.4752950 MHz

===== CHANNEL f2 =====
CPDPRG2  waltz16
NUC2     1H
PCPD2    100.00 nsec
PL2      -6.00 dB
PL12     17.85 dB
PL13     120.00 dB
SFO2     300.1312000 MHz

F2 - Processing parameters:
SI       32768
SF       75.4677490 MHz
WDW      EM
SSB      0
LB       1.00 MHz
GB       0
PC       1.40
    
```

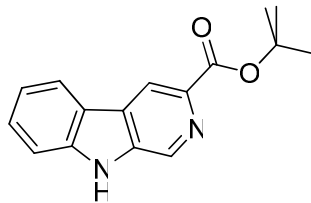

***tert*-butyl 9*H*-pyrido[3,4-*b*]indole-3-carboxylate (2)**

**Proton Spectrum**

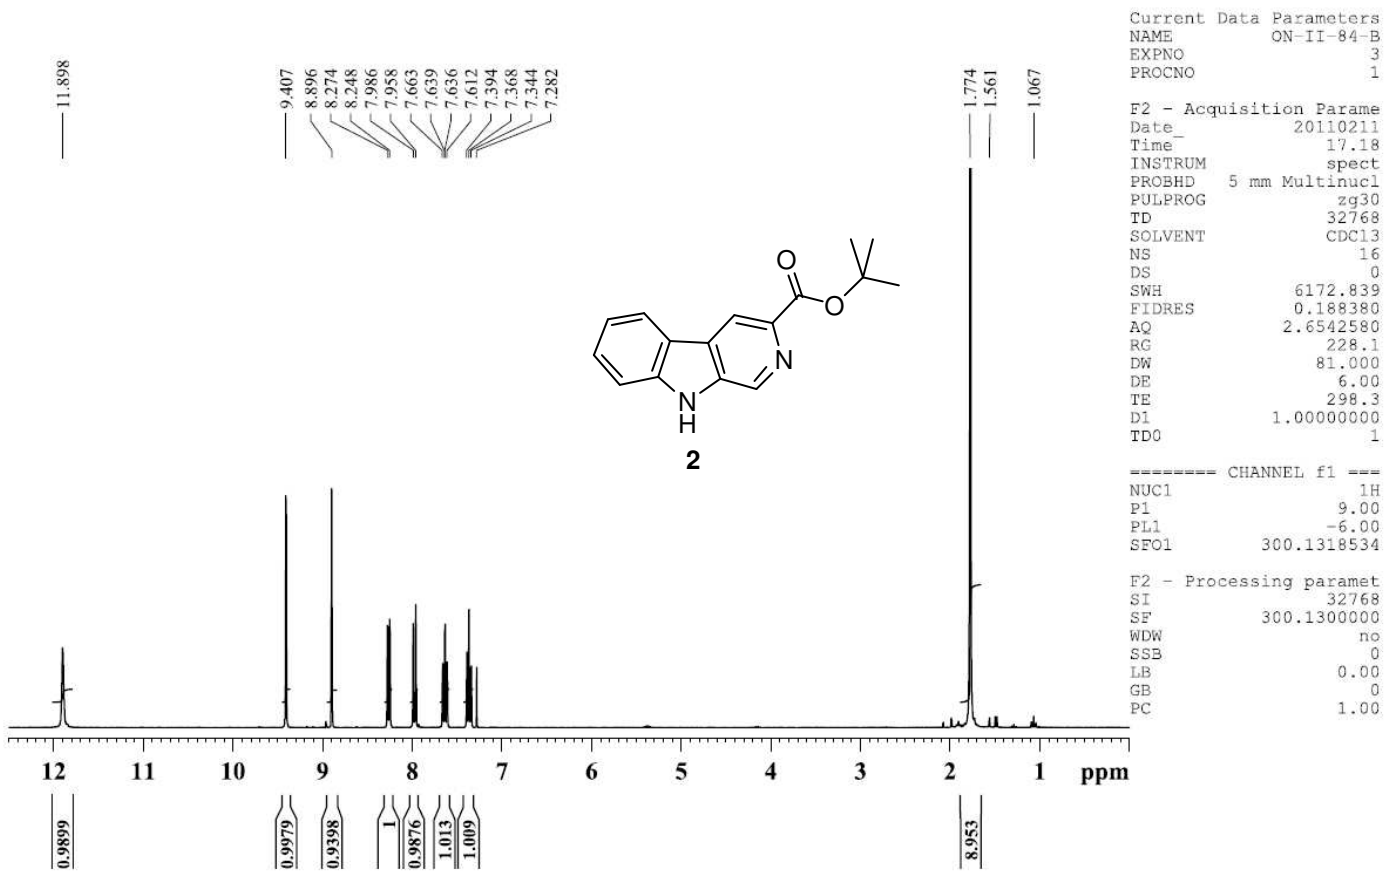

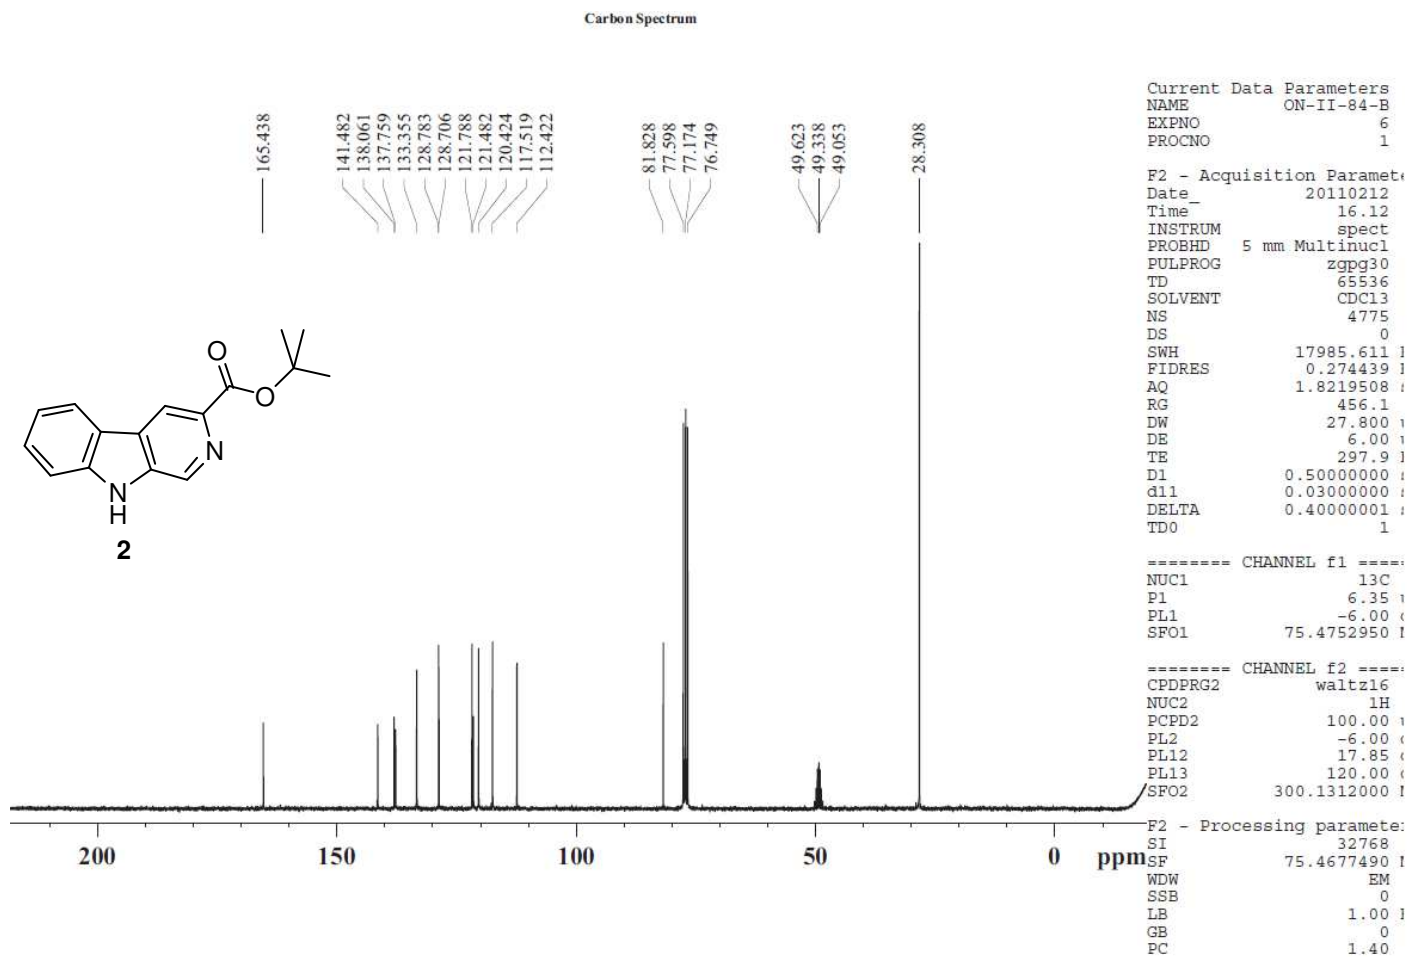

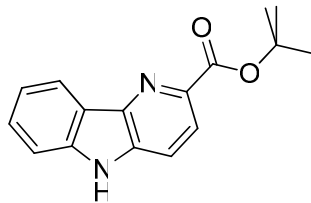

**tert-butyl 5H-pyrido[3,2-b]indole-2-carboxylate (13)**

Proton Spectrum

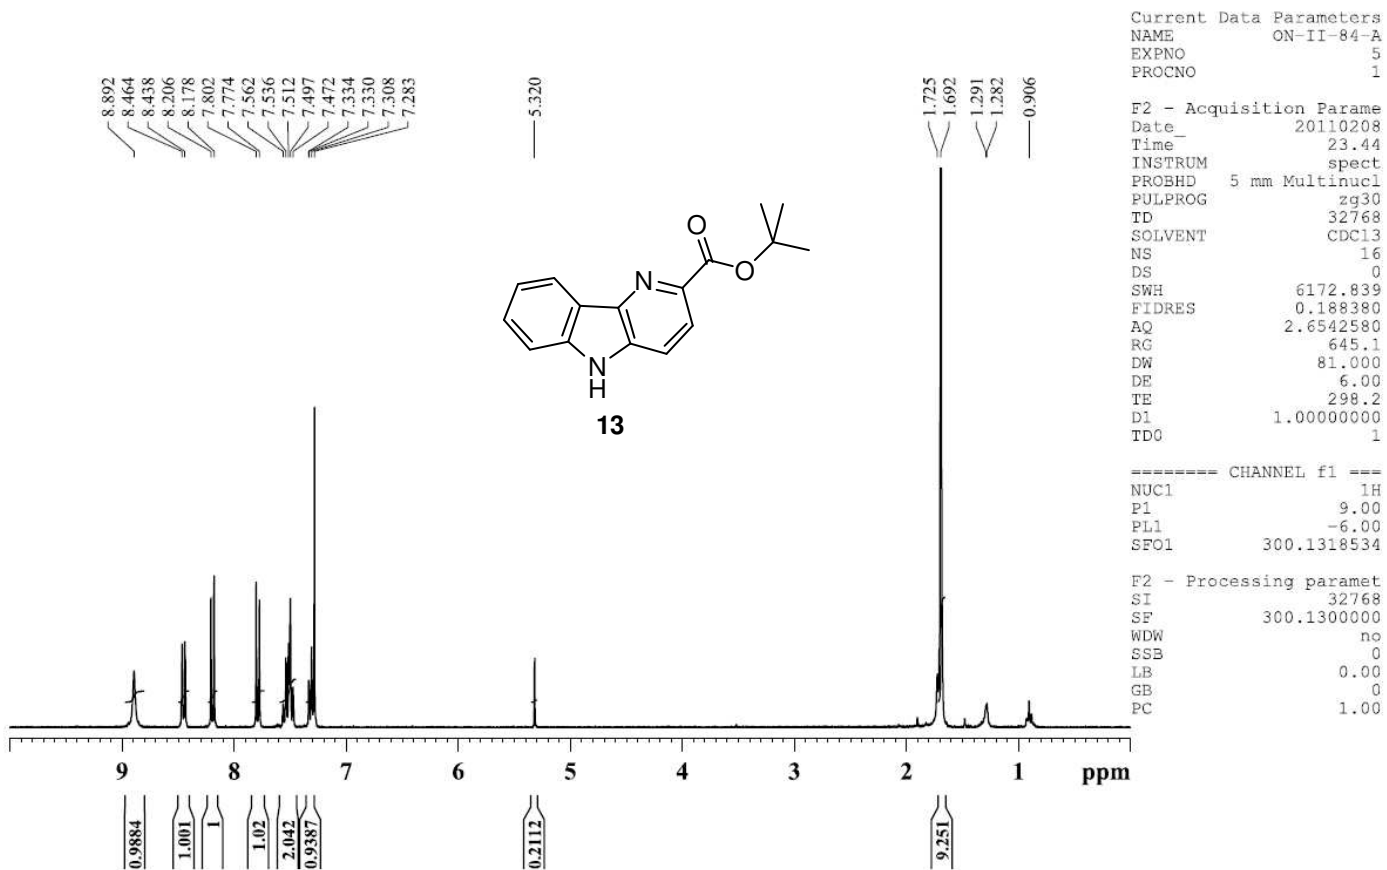



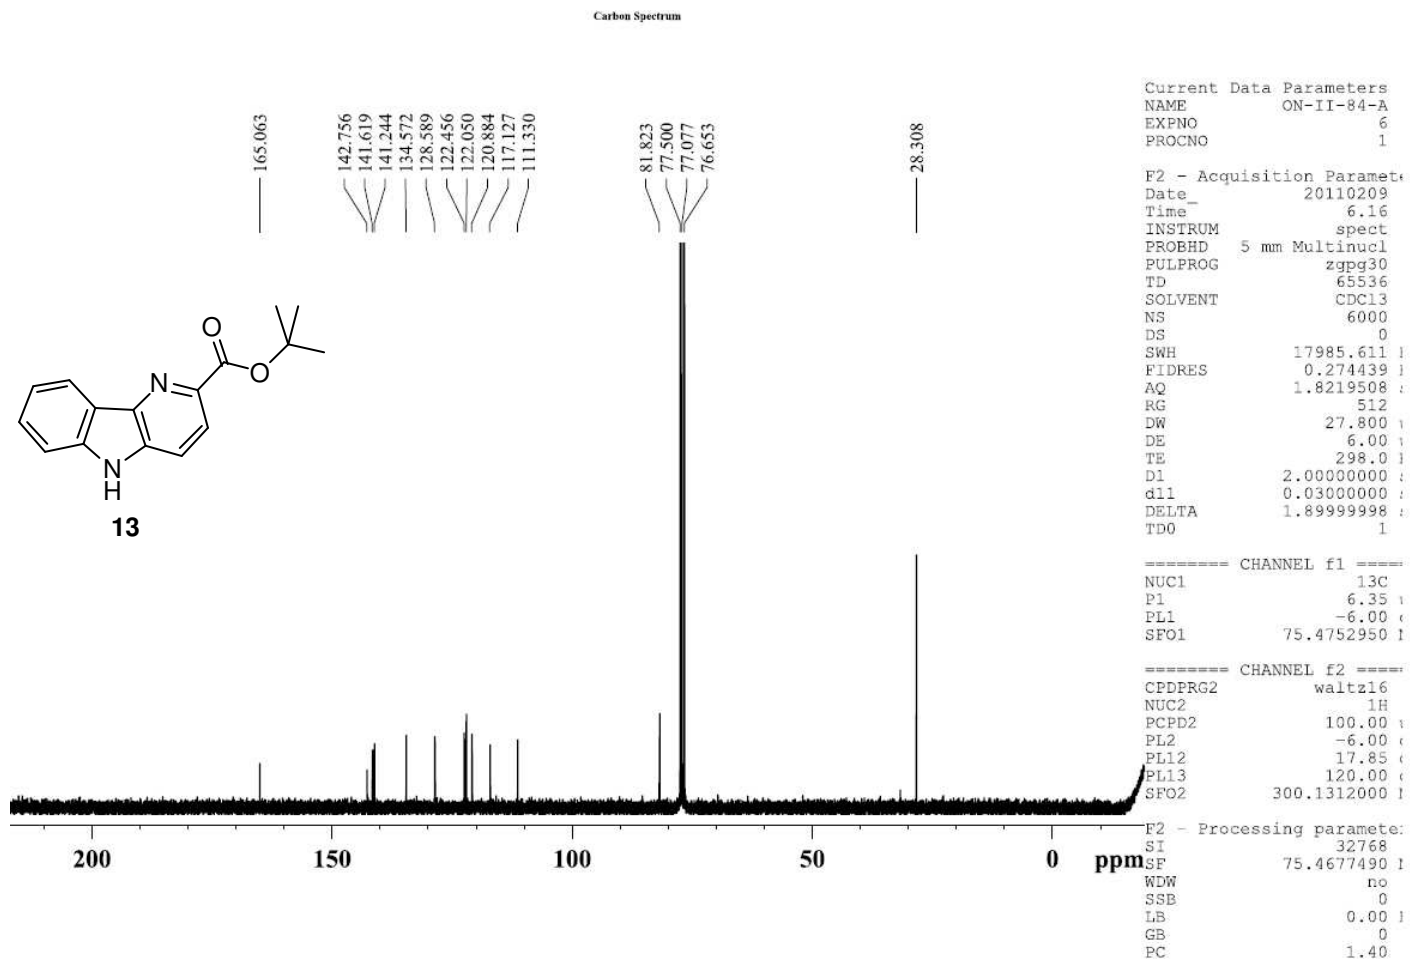

## X-ray diffraction data on compounds **1** and **6**

Single-crystal X-ray diffraction data on compounds **1** and **6** were collected using MoK $\alpha$  radiation and a Bruker APEX 2 CCD area detector. Crystals were prepared for data collection by coating with high viscosity microscope oil. The oil-coated crystal was mounted on a micro-mesh mount (Mitegen, Inc.) and transferred to the diffractometer. The structures were solved by direct methods and refined by full-matrix least squares on  $F^2$  values using the programs found in the SHELXTL suite (Bruker, SHELXTL v6.10, 2000, Bruker AXS Inc., Madison, WI).<sup>1</sup> Corrections were applied for Lorentz, polarization, and absorption effects. Parameters refined included atomic coordinates and anisotropic thermal parameters for all non-hydrogen atoms. Hydrogen atoms on carbons were included using a riding model [coordinate shifts of C applied to H atoms] with C-H distance set at 0.96 Å. Complete information on data collection and refinement is available in the supplemental material.

For compound **1** a 0.313 x 0.082 x 0.042 mm<sup>3</sup> crystal was prepared for data collection and a data set collected at 100 K. The crystal was orthorhombic in space group  $P 2_12_12$ , with unit cell dimensions  $a = 15.2022(11)$ ,  $b = 14.2864(9)$ , and  $c = 11.7464(11)$  Å. Data was 100.0% complete to 25.00°  $\theta$  with an average redundancy of 7.45. The final anisotropic full matrix least-squares refinement on  $F^2$  with 304 variables converged at  $R1 = 5.27\%$ , for the observed data and  $wR2 = 12.55\%$  for all data.

For compound **6** a 0.651 x 0.287 x 0.015 mm<sup>3</sup> crystal was prepared for data collection and a data set collected at 100 K. The crystal was triclinic in space group  $P 1$ , with unit cell dimensions  $a = 5.1335(14)$ ,  $b = 10.319(3)$ ,  $c = 10.983(3)$  Å,  $\alpha = 75.541(9)^\circ$ ,  $\beta = 84.199(10)^\circ$ , and  $\gamma = 88.679(10)^\circ$ . Data was 98.7% complete to 25.00°  $\theta$  with an average redundancy of 2.01. The final anisotropic full matrix least-squares refinement on  $F^2$  with 304 variables converged at  $R1 = 9.24\%$ , for the observed data and  $wR2 = 24.69\%$  for all data.

---

<sup>1</sup> Sheldrick, G.M. *Acta Cryst.* **2008**, *A64*, 112-122.

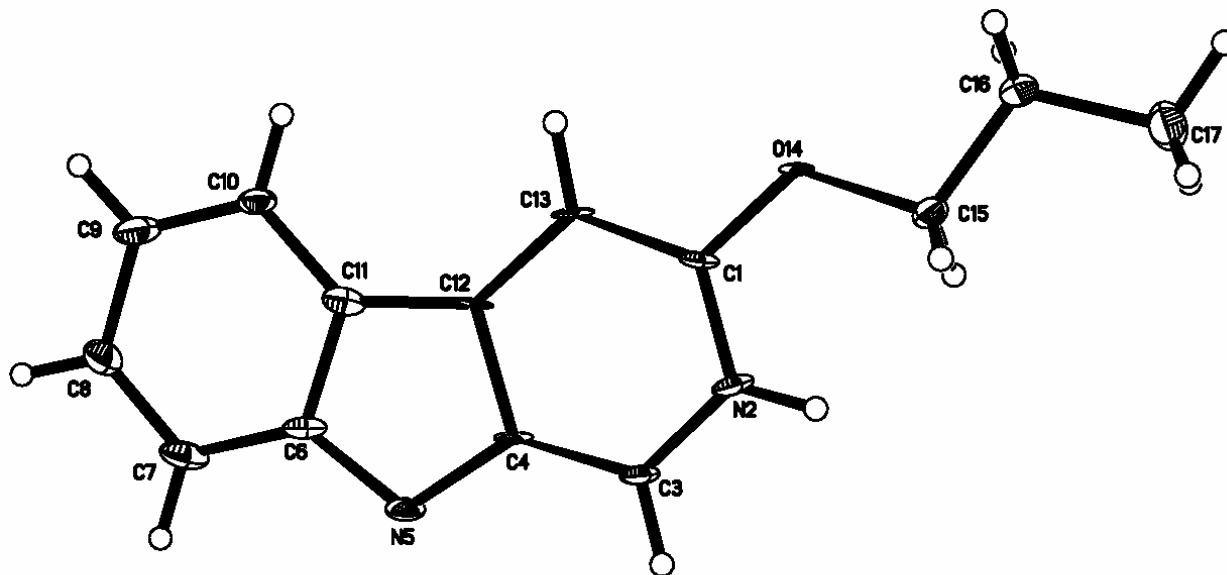

Figure s1. ORTEP drawing for 1

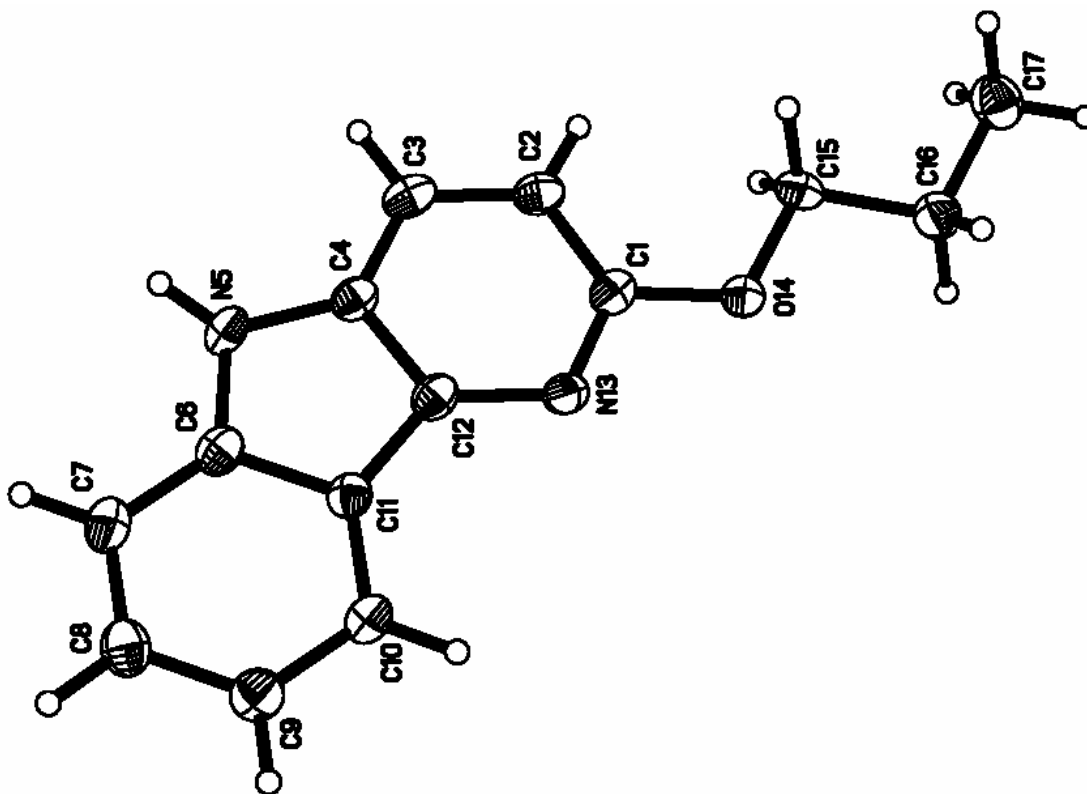

Figure s2. ORTEP drawing for 6

**Table s1.** Crystal data and structure refinement for **1**.

|                                        |                                                              |                     |
|----------------------------------------|--------------------------------------------------------------|---------------------|
| Empirical formula                      | $C_{14}H_{14}N_2O$                                           |                     |
| Formula weight                         | 212.16                                                       |                     |
| Temperature                            | 100(2) °K                                                    |                     |
| Wavelength                             | 0.71073 Å                                                    |                     |
| Crystal system                         | Orthorhombic                                                 |                     |
| Space group                            | $P 2_12_12$                                                  |                     |
| Unit cell dimensions                   | $a = 14.2022(11)$ Å                                          | $\alpha = 90^\circ$ |
|                                        | $b = 14.2864(9)$ Å                                           | $\beta = 90^\circ$  |
|                                        | $c = 11.7464(11)$ Å                                          | $\gamma = 90^\circ$ |
| Volume                                 | $2383.3(3)$ Å <sup>3</sup>                                   |                     |
| Z                                      | 8                                                            |                     |
| Density (calculated)                   | 1.183 Mg/m <sup>3</sup>                                      |                     |
| Absorption coefficient                 | 0.078 mm <sup>-1</sup>                                       |                     |
| F(000)                                 | 848                                                          |                     |
| Crystal size                           | 0.313 x 0.082 x 0.042 mm <sup>3</sup>                        |                     |
| $\theta$ range for data collection     | 1.73 to 28.48°                                               |                     |
| Index ranges                           | $-18 \leq h \leq 19, -19 \leq k \leq 19, -15 \leq l \leq 15$ |                     |
| Reflections collected                  | 25345                                                        |                     |
| Independent reflections                | 5989 [R(int) = 0.0736]                                       |                     |
| Completeness to $\theta = 25.00^\circ$ | 100.0 %                                                      |                     |
| Absorption correction                  | Semi-empirical from equivalents                              |                     |
| Max. and min. transmission             | 0.9967 and 0.9760                                            |                     |
| Refinement method                      | Full-matrix least-squares on F <sup>2</sup>                  |                     |
| Data / restraints / parameters         | 5989 / 12 / 304                                              |                     |
| Goodness-of-fit on F <sup>2</sup>      | 1.027                                                        |                     |
| Final R indices [I > 2 $\sigma$ (I)]   | R1 = 0.0527, wR2 = 0.1103                                    |                     |
| R indices (all data)                   | R1 = 0.0846, wR2 = 0.1255                                    |                     |
| Absolute structure parameter           | 1.0(14)                                                      |                     |
| Extinction coefficient                 | 0.0046(7)                                                    |                     |
| Largest diff. peak and hole            | 0.349 and -0.424 e.Å <sup>-3</sup>                           |                     |

**Table s2.** Atomic coordinates ( $\times 10^4$ ) and equivalent isotropic displacement parameters ( $\text{\AA}^2 \times 10^3$ ) for **1**.  $U(\text{eq})$  is defined as one third of the trace of the orthogonalized  $U^{ij}$  tensor.

|        | x       | y       | z        | U(eq) |
|--------|---------|---------|----------|-------|
| C(1)   | 6056(2) | 6232(2) | 5303(2)  | 22(1) |
| C(2)   | 6294(2) | 6119(2) | 4151(2)  | 24(1) |
| C(3)   | 5599(2) | 6074(2) | 3346(2)  | 26(1) |
| C(4)   | 4682(2) | 6142(2) | 3723(2)  | 22(1) |
| N(5)   | 3842(1) | 6113(1) | 3142(2)  | 24(1) |
| C(6)   | 3116(2) | 6180(2) | 3917(2)  | 23(1) |
| C(7)   | 2153(2) | 6159(2) | 3721(2)  | 27(1) |
| C(8)   | 1562(2) | 6274(2) | 4650(2)  | 29(1) |
| C(9)   | 1928(2) | 6401(2) | 5752(2)  | 27(1) |
| C(10)  | 2883(2) | 6403(2) | 5944(2)  | 23(1) |
| C(11)  | 3493(2) | 6293(2) | 5023(2)  | 20(1) |
| C(12)  | 4498(2) | 6254(2) | 4894(2)  | 22(1) |
| N(13)  | 5184(1) | 6301(1) | 5688(1)  | 21(1) |
| O(14)  | 6715(1) | 6267(1) | 6152(1)  | 23(1) |
| C(15)  | 7685(1) | 6234(2) | 5804(2)  | 24(1) |
| C(16)  | 8296(2) | 6225(2) | 6851(2)  | 27(1) |
| C(17)  | 9344(1) | 6238(1) | 6484(2)  | 33(1) |
| C(1')  | 3209(1) | 4962(1) | 10346(1) | 23(1) |
| C(2')  | 3182(1) | 4694(1) | 9212(1)  | 25(1) |
| C(3')  | 3684(2) | 5155(2) | 8388(2)  | 25(1) |
| C(4')  | 4237(2) | 5889(2) | 8738(2)  | 21(1) |
| N(5')  | 4840(1) | 6461(1) | 8145(2)  | 23(1) |
| C(6')  | 5249(2) | 7077(2) | 8892(2)  | 24(1) |
| C(7')  | 5925(2) | 7750(2) | 8684(2)  | 34(1) |
| C(8')  | 6213(2) | 8302(2) | 9580(2)  | 40(1) |
| C(9')  | 5849(2) | 8178(2) | 10675(2) | 37(1) |
| C(10') | 5189(2) | 7494(2) | 10895(2) | 28(1) |
| C(11') | 4889(2) | 6922(2) | 9999(2)  | 22(1) |
| C(12') | 4248(2) | 6150(2) | 9897(2)  | 21(1) |
| N(13') | 3747(1) | 5691(1) | 10705(1) | 21(1) |
| O(14') | 2762(1) | 4534(1) | 11205(1) | 27(1) |
| C(15') | 2234(2) | 3708(2) | 10893(2) | 31(1) |
| C(16') | 1904(2) | 3226(2) | 11948(2) | 38(1) |
| C(17') | 1210(2) | 3786(2) | 12659(2) | 49(1) |

**Table s3.** Bond lengths [ $\text{\AA}$ ] and angles [ $^\circ$ ] for **1**.

|                  |            |                  |            |
|------------------|------------|------------------|------------|
| C(1)-N(13)       | 1.322(3)   | C(1)-O(14)       | 1.369(3)   |
| C(1)-C(2)        | 1.404(3)   | C(2)-C(3)        | 1.369(3)   |
| C(2)-H(2A)       | 0.9500     | C(3)-C(4)        | 1.379(3)   |
| C(3)-H(3A)       | 0.9500     | C(4)-N(5)        | 1.375(3)   |
| C(4)-C(12)       | 1.409(3)   | N(5)-C(6)        | 1.378(3)   |
| N(5)-H(5A)       | 0.8800     | C(6)-C(7)        | 1.387(3)   |
| C(6)-C(11)       | 1.415(3)   | C(7)-C(8)        | 1.386(3)   |
| C(7)-H(7A)       | 0.9500     | C(8)-C(9)        | 1.407(3)   |
| C(8)-H(8A)       | 0.9500     | C(9)-C(10)       | 1.375(3)   |
| C(9)-H(9A)       | 0.9500     | C(10)-C(11)      | 1.396(3)   |
| C(10)-H(10A)     | 0.9500     | C(11)-C(12)      | 1.437(3)   |
| C(12)-N(13)      | 1.350(3)   | O(14)-C(15)      | 1.437(2)   |
| C(15)-C(16)      | 1.505(3)   | C(15)-H(15A)     | 0.9900     |
| C(15)-H(15B)     | 0.9900     | C(16)-C(17)      | 1.550(3)   |
| C(16)-H(16A)     | 0.9900     | C(16)-H(16B)     | 0.9900     |
| C(17)-H(17A)     | 0.9800     | C(17)-H(17B)     | 0.9800     |
| C(17)-H(17C)     | 0.9800     | C(1')-O(14')     | 1.3400(19) |
| C(1')-N(13')     | 1.358(2)   | C(1')-C(2')      | 1.3869     |
| C(2')-C(3')      | 1.372(3)   | C(2')-H(2'A)     | 0.9500     |
| C(3')-C(4')      | 1.373(3)   | C(3')-H(3'A)     | 0.9500     |
| C(4')-N(5')      | 1.373(3)   | C(4')-C(12')     | 1.412(3)   |
| N(5')-C(6')      | 1.372(3)   | N(5')-H(5'A)     | 0.8800     |
| C(6')-C(7')      | 1.381(3)   | C(6')-C(11')     | 1.415(3)   |
| C(7')-C(8')      | 1.377(4)   | C(7')-H(7'A)     | 0.9500     |
| C(8')-C(9')      | 1.398(3)   | C(8')-H(8'A)     | 0.9500     |
| C(9')-C(10')     | 1.379(3)   | C(9')-H(9'A)     | 0.9500     |
| C(10')-C(11')    | 1.398(3)   | C(10')-H(10B)    | 0.9500     |
| C(11')-C(12')    | 1.434(3)   | C(12')-N(13')    | 1.356(3)   |
| O(14')-C(15')    | 1.445(3)   | C(15')-C(16')    | 1.493(3)   |
| C(15')-H(15C)    | 0.9900     | C(15')-H(15D)    | 0.9900     |
| C(16')-C(17')    | 1.520(4)   | C(16')-H(16C)    | 0.9900     |
| C(16')-H(16D)    | 0.9900     | C(17')-H(17D)    | 0.9800     |
| C(17')-H(17E)    | 0.9800     | C(17')-H(17F)    | 0.9800     |
| N(13)-C(1)-O(14) | 112.90(17) | N(13)-C(1)-C(2)  | 124.3(2)   |
| O(14)-C(1)-C(2)  | 122.8(2)   | C(3)-C(2)-C(1)   | 119.8(2)   |
| C(3)-C(2)-H(2A)  | 120.1      | C(1)-C(2)-H(2A)  | 120.1      |
| C(2)-C(3)-C(4)   | 117.2(2)   | C(2)-C(3)-H(3A)  | 121.4      |
| C(4)-C(3)-H(3A)  | 121.4      | N(5)-C(4)-C(3)   | 131.15(19) |
| N(5)-C(4)-C(12)  | 109.11(19) | C(3)-C(4)-C(12)  | 119.7(2)   |
| C(4)-N(5)-C(6)   | 108.62(17) | C(4)-N(5)-H(5A)  | 125.7      |
| C(6)-N(5)-H(5A)  | 125.7      | N(5)-C(6)-C(7)   | 128.8(2)   |
| N(5)-C(6)-C(11)  | 109.36(19) | C(7)-C(6)-C(11)  | 121.8(2)   |
| C(8)-C(7)-C(6)   | 117.7(2)   | C(8)-C(7)-H(7A)  | 121.1      |
| C(6)-C(7)-H(7A)  | 121.1      | C(7)-C(8)-C(9)   | 121.0(2)   |
| C(7)-C(8)-H(8A)  | 119.5      | C(9)-C(8)-H(8A)  | 119.5      |
| C(10)-C(9)-C(8)  | 121.1(2)   | C(10)-C(9)-H(9A) | 119.5      |
| C(8)-C(9)-H(9A)  | 119.5      | C(9)-C(10)-C(11) | 119.0(2)   |

**Table s3.** (continued)

|                      |            |                      |            |
|----------------------|------------|----------------------|------------|
| C(9)-C(10)-H(10A)    | 120.5      | C(11)-C(10)-H(10A)   | 120.5      |
| C(10)-C(11)-C(6)     | 119.4(2)   | C(10)-C(11)-C(12)    | 134.7(2)   |
| C(6)-C(11)-C(12)     | 105.96(18) | N(13)-C(12)-C(4)     | 123.1(2)   |
| N(13)-C(12)-C(11)    | 129.96(19) | C(4)-C(12)-C(11)     | 106.90(19) |
| C(1)-N(13)-C(12)     | 115.82(18) | C(1)-O(14)-C(15)     | 116.55(16) |
| O(14)-C(15)-C(16)    | 108.65(17) | O(14)-C(15)-H(15A)   | 110.0      |
| C(16)-C(15)-H(15A)   | 110.0      | O(14)-C(15)-H(15B)   | 110.0      |
| C(16)-C(15)-H(15B)   | 110.0      | H(15A)-C(15)-H(15B)  | 108.3      |
| C(15)-C(16)-C(17)    | 109.05(17) | C(15)-C(16)-H(16A)   | 109.9      |
| C(17)-C(16)-H(16A)   | 109.9      | C(15)-C(16)-H(16B)   | 109.9      |
| C(17)-C(16)-H(16B)   | 109.9      | H(16A)-C(16)-H(16B)  | 108.3      |
| C(16)-C(17)-H(17A)   | 109.5      | C(16)-C(17)-H(17B)   | 109.5      |
| H(17A)-C(17)-H(17B)  | 109.5      | C(16)-C(17)-H(17C)   | 109.5      |
| H(17A)-C(17)-H(17C)  | 109.5      | H(17B)-C(17)-H(17C)  | 109.5      |
| O(14')-C(1')-N(13')  | 112.53(14) | O(14')-C(1')-C(2')   | 125.69(11) |
| N(13')-C(1')-C(2')   | 121.73(10) | C(3')-C(2')-C(1')    | 122.03(11) |
| C(3')-C(2')-H(2'A)   | 119.0      | C(1')-C(2')-H(2'A)   | 119.0      |
| C(2')-C(3')-C(4')    | 116.95(19) | C(2')-C(3')-H(3'A)   | 121.5      |
| C(4')-C(3')-H(3'A)   | 121.5      | C(3')-C(4')-N(5')    | 131.2(2)   |
| C(3')-C(4')-C(12')   | 119.8(2)   | N(5')-C(4')-C(12')   | 108.99(19) |
| C(6')-N(5')-C(4')    | 108.70(18) | C(6')-N(5')-H(5'A)   | 125.6      |
| C(4')-N(5')-H(5'A)   | 125.6      | N(5')-C(6')-C(7')    | 128.9(2)   |
| N(5')-C(6')-C(11')   | 109.54(19) | C(7')-C(6')-C(11')   | 121.6(2)   |
| C(8')-C(7')-C(6')    | 118.0(2)   | C(8')-C(7')-H(7'A)   | 121.0      |
| C(6')-C(7')-H(7'A)   | 121.0      | C(7')-C(8')-C(9')    | 121.4(2)   |
| C(7')-C(8')-H(8'A)   | 119.3      | C(9')-C(8')-H(8'A)   | 119.3      |
| C(10')-C(9')-C(8')   | 121.0(2)   | C(10')-C(9')-H(9'A)  | 119.5      |
| C(8')-C(9')-H(9'A)   | 119.5      | C(9')-C(10')-C(11')  | 118.7(2)   |
| C(9')-C(10')-H(10B)  | 120.7      | C(11')-C(10')-H(10B) | 120.7      |
| C(10')-C(11')-C(6')  | 119.3(2)   | C(10')-C(11')-C(12') | 134.8(2)   |
| C(6')-C(11')-C(12')  | 105.85(18) | N(13')-C(12')-C(4')  | 122.7(2)   |
| N(13')-C(12')-C(11') | 130.32(19) | C(4')-C(12')-C(11')  | 106.90(18) |
| C(12')-N(13')-C(1')  | 116.72(16) | C(1')-O(14')-C(15')  | 115.34(15) |
| O(14')-C(15')-C(16') | 109.16(18) | O(14')-C(15')-H(15C) | 109.8      |
| C(16')-C(15')-H(15C) | 109.8      | O(14')-C(15')-H(15D) | 109.8      |
| C(16')-C(15')-H(15D) | 109.8      | H(15C)-C(15')-H(15D) | 108.3      |
| C(15')-C(16')-C(17') | 114.7(2)   | C(15')-C(16')-H(16C) | 108.6      |
| C(17')-C(16')-H(16C) | 108.6      | C(15')-C(16')-H(16D) | 108.6      |
| C(17')-C(16')-H(16D) | 108.6      | H(16C)-C(16')-H(16D) | 107.6      |
| C(16')-C(17')-H(17D) | 109.5      | C(16')-C(17')-H(17E) | 109.5      |
| H(17D)-C(17')-H(17E) | 109.5      | C(16')-C(17')-H(17F) | 109.5      |
| H(17D)-C(17')-H(17F) | 109.5      | H(17E)-C(17')-H(17F) | 109.5      |

**Table s4.** Anisotropic displacement parameters ( $\text{\AA}^2 \times 10^3$ ) for **1**. The anisotropic displacement factor exponent takes the form:  $-2\pi^2 [ h^2 a^{*2}U^{11} + \dots + 2 h k a^* b^* U^{12} ]$

|        | U <sup>11</sup> | U <sup>22</sup> | U <sup>33</sup> | U <sup>23</sup> | U <sup>13</sup> | U <sup>12</sup> |
|--------|-----------------|-----------------|-----------------|-----------------|-----------------|-----------------|
| C(1)   | 28(1)           | 18(1)           | 20(1)           | -1(1)           | 1(1)            | 1(1)            |
| C(2)   | 26(1)           | 25(1)           | 22(1)           | 0(1)            | 6(1)            | 2(1)            |
| C(3)   | 34(1)           | 24(1)           | 20(1)           | 1(1)            | 6(1)            | 2(1)            |
| C(4)   | 27(1)           | 19(1)           | 19(1)           | 1(1)            | 1(1)            | 1(1)            |
| N(5)   | 28(1)           | 26(1)           | 16(1)           | 1(1)            | -2(1)           | 4(1)            |
| C(6)   | 29(1)           | 19(1)           | 22(1)           | 1(1)            | -1(1)           | 3(1)            |
| C(7)   | 30(1)           | 26(1)           | 24(1)           | 2(1)            | -6(1)           | 2(1)            |
| C(8)   | 26(1)           | 29(1)           | 32(1)           | 1(1)            | -4(1)           | 4(1)            |
| C(9)   | 28(1)           | 27(1)           | 27(1)           | -1(1)           | 2(1)            | 5(1)            |
| C(10)  | 28(1)           | 24(1)           | 19(1)           | 0(1)            | -1(1)           | 3(1)            |
| C(11)  | 22(1)           | 18(1)           | 21(1)           | 3(1)            | -1(1)           | 1(1)            |
| C(12)  | 27(1)           | 19(1)           | 20(1)           | 2(1)            | -1(1)           | 2(1)            |
| N(13)  | 24(1)           | 21(1)           | 19(1)           | 1(1)            | 2(1)            | -2(1)           |
| O(14)  | 20(1)           | 31(1)           | 20(1)           | 1(1)            | 1(1)            | -2(1)           |
| C(15)  | 19(1)           | 25(1)           | 26(1)           | 1(1)            | 6(1)            | -2(1)           |
| C(16)  | 26(1)           | 30(1)           | 26(1)           | -2(1)           | 2(1)            | -2(1)           |
| C(17)  | 26(1)           | 37(1)           | 38(1)           | -2(1)           | 0(1)            | 2(1)            |
| C(1')  | 27(1)           | 21(1)           | 21(1)           | 3(1)            | -4(1)           | -2(1)           |
| C(2')  | 30(1)           | 23(1)           | 23(1)           | -3(1)           | -7(1)           | 0(1)            |
| C(3')  | 31(1)           | 25(1)           | 19(1)           | -3(1)           | -3(1)           | 4(1)            |
| C(4')  | 23(1)           | 22(1)           | 19(1)           | 1(1)            | 1(1)            | 5(1)            |
| N(5')  | 26(1)           | 27(1)           | 17(1)           | 2(1)            | 2(1)            | 3(1)            |
| C(6')  | 25(1)           | 27(1)           | 19(1)           | 4(1)            | -1(1)           | 1(1)            |
| C(7')  | 34(2)           | 40(1)           | 30(1)           | 8(1)            | 4(1)            | -8(1)           |
| C(8')  | 44(2)           | 39(2)           | 37(2)           | 9(1)            | 2(1)            | -18(1)          |
| C(9')  | 46(2)           | 37(2)           | 28(1)           | 0(1)            | -2(1)           | -16(1)          |
| C(10') | 34(1)           | 29(1)           | 21(1)           | 1(1)            | 0(1)            | -4(1)           |
| C(11') | 23(1)           | 23(1)           | 20(1)           | 0(1)            | 1(1)            | -1(1)           |
| C(12') | 21(1)           | 23(1)           | 18(1)           | -1(1)           | 2(1)            | 3(1)            |
| N(13') | 24(1)           | 21(1)           | 18(1)           | 0(1)            | 0(1)            | -2(1)           |
| O(14') | 34(1)           | 28(1)           | 20(1)           | 3(1)            | -3(1)           | -12(1)          |
| C(15') | 37(1)           | 28(1)           | 29(1)           | 4(1)            | -11(1)          | -15(1)          |
| C(16') | 44(2)           | 40(2)           | 31(1)           | 7(1)            | -11(1)          | -21(1)          |
| C(17') | 49(2)           | 57(2)           | 42(2)           | 3(2)            | 2(1)            | -22(2)          |



**Table s5.** Hydrogen coordinates ( $\times 10^4$ ) and isotropic displacement parameters ( $\text{\AA}^2 \times 10^3$ ) for **1**.

|        | x    | y    | z     | U(eq) |
|--------|------|------|-------|-------|
| H(2A)  | 6936 | 6075 | 3931  | 29    |
| H(3A)  | 5742 | 5998 | 2562  | 31    |
| H(5A)  | 3778 | 6060 | 2400  | 28    |
| H(7A)  | 1908 | 6070 | 2977  | 32    |
| H(8A)  | 899  | 6266 | 4540  | 35    |
| H(9A)  | 1508 | 6488 | 6373  | 33    |
| H(10A) | 3123 | 6478 | 6693  | 28    |
| H(15A) | 7836 | 6787 | 5330  | 28    |
| H(15B) | 7801 | 5663 | 5346  | 28    |
| H(16A) | 8165 | 5656 | 7306  | 33    |
| H(16B) | 8156 | 6780 | 7328  | 33    |
| H(17A) | 9746 | 6245 | 7163  | 50    |
| H(17B) | 9467 | 6799 | 6028  | 50    |
| H(17C) | 9482 | 5679 | 6031  | 50    |
| H(2'A) | 2803 | 4174 | 8999  | 30    |
| H(3'A) | 3651 | 4975 | 7610  | 30    |
| H(5'A) | 4946 | 6437 | 7407  | 28    |
| H(7'A) | 6184 | 7831 | 7944  | 41    |
| H(8'A) | 6669 | 8777 | 9451  | 48    |
| H(9'A) | 6059 | 8570 | 11277 | 44    |
| H(10B) | 4942 | 7412 | 11640 | 33    |
| H(15C) | 2637 | 3280 | 10444 | 38    |
| H(15D) | 1686 | 3886 | 10419 | 38    |
| H(16C) | 2459 | 3078 | 12425 | 46    |
| H(16D) | 1605 | 2627 | 11730 | 46    |
| H(17D) | 992  | 3404 | 13300 | 74    |
| H(17E) | 670  | 3965 | 12187 | 74    |
| H(17F) | 1519 | 4351 | 12950 | 74    |

**Table s6.** Torsion angles [°] for **1**.

|                         |             |                           |             |
|-------------------------|-------------|---------------------------|-------------|
| N(13)-C(1)-C(2)-C(3)    | -0.1(4)     | O(14)-C(1)-C(2)-C(3)      | 178.9(2)    |
| C(1)-C(2)-C(3)-C(4)     | 0.0(3)      | C(2)-C(3)-C(4)-N(5)       | -179.3(2)   |
| C(2)-C(3)-C(4)-C(12)    | 0.0(3)      | C(3)-C(4)-N(5)-C(6)       | 177.9(2)    |
| C(12)-C(4)-N(5)-C(6)    | -1.5(2)     | C(4)-N(5)-C(6)-C(7)       | -178.4(2)   |
| C(4)-N(5)-C(6)-C(11)    | 2.4(2)      | N(5)-C(6)-C(7)-C(8)       | -177.8(2)   |
| C(11)-C(6)-C(7)-C(8)    | 1.3(4)      | C(6)-C(7)-C(8)-C(9)       | -0.3(3)     |
| C(7)-C(8)-C(9)-C(10)    | -0.9(4)     | C(8)-C(9)-C(10)-C(11)     | 1.2(3)      |
| C(9)-C(10)-C(11)-C(6)   | -0.2(3)     | C(9)-C(10)-C(11)-C(12)    | -179.5(2)   |
| N(5)-C(6)-C(11)-C(10)   | 178.2(2)    | C(7)-C(6)-C(11)-C(10)     | -1.1(3)     |
| N(5)-C(6)-C(11)-C(12)   | -2.3(3)     | C(7)-C(6)-C(11)-C(12)     | 178.5(2)    |
| N(5)-C(4)-C(12)-N(13)   | 179.5(2)    | C(3)-C(4)-C(12)-N(13)     | 0.1(4)      |
| N(5)-C(4)-C(12)-C(11)   | 0.0(3)      | C(3)-C(4)-C(12)-C(11)     | -179.4(2)   |
| C(10)-C(11)-C(12)-N(13) | 1.3(5)      | C(6)-C(11)-C(12)-N(13)    | -178.1(2)   |
| C(10)-C(11)-C(12)-C(4)  | -179.3(2)   | C(6)-C(11)-C(12)-C(4)     | 1.4(3)      |
| O(14)-C(1)-N(13)-C(12)  | -178.92(19) | C(2)-C(1)-N(13)-C(12)     | 0.2(3)      |
| C(4)-C(12)-N(13)-C(1)   | -0.2(3)     | C(11)-C(12)-N(13)-C(1)    | 179.1(2)    |
| N(13)-C(1)-O(14)-C(15)  | -177.65(19) | C(2)-C(1)-O(14)-C(15)     | 3.2(3)      |
| C(1)-O(14)-C(15)-C(16)  | -176.81(18) | O(14)-C(15)-C(16)-C(17)   | -177.24(18) |
| O(14)-C(1)-C(2)-C(3)    | -178.0(2)   | N(13')-C(1')-C(2')-C(3')  | -0.92(18)   |
| C(1)-C(2)-C(3)-C(4)     | 1.4(3)      | C(2')-C(3')-C(4')-N(5')   | 177.4(2)    |
| C(2)-C(3)-C(4)-C(12)    | -1.6(3)     | C(3')-C(4')-N(5')-C(6')   | -178.3(2)   |
| C(12)-C(4)-N(5)-C(6)    | 0.8(2)      | C(4')-N(5')-C(6')-C(7')   | 177.1(2)    |
| C(4)-N(5)-C(6)-C(11)    | -1.5(3)     | N(5')-C(6')-C(7')-C(8')   | 178.6(2)    |
| C(11)-C(6)-C(7)-C(8)    | -2.9(4)     | C(6)-C(7)-C(8)-C(9')      | 1.2(4)      |
| C(7)-C(8)-C(9)-C(10)    | 0.2(4)      | C(8)-C(9)-C(10)-C(11')    | 0.1(4)      |
| C(9)-C(10)-C(11)-C(6)   | -1.8(3)     | C(9)-C(10)-C(11)-C(12')   | 178.7(3)    |
| N(5)-C(6)-C(11)-C(10)   | -178.0(2)   | C(7)-C(6)-C(11)-C(10')    | 3.2(3)      |
| N(5)-C(6)-C(11)-C(12)   | 1.6(3)      | C(7)-C(6)-C(11)-C(12')    | -177.1(2)   |
| C(3)-C(4)-C(12)-N(13)   | 1.6(3)      | N(5')-C(4')-C(12')-N(13') | -177.6(2)   |
| C(3)-C(4)-C(12)-C(11)   | 179.4(2)    | N(5')-C(4')-C(12')-C(11') | 0.2(2)      |
| C(10)-C(11)-C(12)-N(13) | -3.9(4)     | C(6)-C(11)-C(12)-N(13')   | 176.5(2)    |
| C(10)-C(11)-C(12)-C(4)  | 178.4(3)    | C(6)-C(11)-C(12)-C(4')    | -1.1(2)     |
| C(4)-C(12)-N(13)-C(1)   | -1.0(3)     | C(11)-C(12)-N(13)-C(1')   | -178.4(2)   |
| O(14)-C(1)-N(13)-C(12)  | 178.16(17)  | C(2)-C(1)-N(13)-C(12')    | 0.7(2)      |
| N(13)-C(1)-O(14)-C(15)  | -175.48(17) | C(2)-C(1)-O(14)-C(15')    | 1.9(2)      |
| C(1)-O(14)-C(15)-C(16)  | 171.2(2)    | O(14)-C(15)-C(16)-C(17)   | 64.5(3)     |

**Table s7.** Crystal data and structure refinement for **6**.

|                                        |                                             |                             |
|----------------------------------------|---------------------------------------------|-----------------------------|
| Empirical formula                      | C14 H14 N2 O                                |                             |
| Formula weight                         | 226.27                                      |                             |
| Temperature                            | 100(2) K                                    |                             |
| Wavelength                             | 0.71073 Å                                   |                             |
| Crystal system                         | Triclinic                                   |                             |
| Space group                            | P 1                                         |                             |
| Unit cell dimensions                   | a = 5.1335(14) Å                            | $\alpha = 75.541(9)^\circ$  |
|                                        | b = 10.319(3) Å                             | $\beta = 84.199(10)^\circ$  |
|                                        | c = 10.983(3) Å                             | $\gamma = 88.679(10)^\circ$ |
| Volume                                 | 560.4(3) Å <sup>3</sup>                     |                             |
| Z                                      | 2                                           |                             |
| Density (calculated)                   | 1.341 Mg/m <sup>3</sup>                     |                             |
| Absorption coefficient                 | 0.086 mm <sup>-1</sup>                      |                             |
| F(000)                                 | 240                                         |                             |
| Crystal size                           | 0.651 x 0.287 x 0.015 mm <sup>3</sup>       |                             |
| $\theta$ range for data collection     | 1.92 to 28.33°                              |                             |
| Index ranges                           | -6 ≤ h ≤ 6, -13 ≤ k ≤ 13, -14 ≤ l ≤ 14      |                             |
| Reflections collected                  | 5612                                        |                             |
| Independent reflections                | 4441 [R(int) = 0.0573]                      |                             |
| Completeness to $\theta = 25.00^\circ$ | 98.7 %                                      |                             |
| Absorption correction                  | Semi-empirical from equivalents             |                             |
| Max. and min. transmission             | 0.9987 and 0.9460                           |                             |
| Refinement method                      | Full-matrix least-squares on F <sup>2</sup> |                             |
| Data / restraints / parameters         | 4441 / 231 / 309                            |                             |
| Goodness-of-fit on F <sup>2</sup>      | 1.085                                       |                             |
| Final R indices [I > 2 $\sigma$ (I)]   | R1 = 0.0924, wR2 = 0.2292                   |                             |
| R indices (all data)                   | R1 = 0.1124, wR2 = 0.2469                   |                             |
| Absolute structure parameter           | 0(2)                                        |                             |
| Largest diff. peak and hole            | 0.966 and -0.469 e.Å <sup>-3</sup>          |                             |

**Table s8.** Atomic coordinates ( $\times 10^4$ ) and equivalent isotropic displacement parameters ( $\text{\AA}^2 \times 10^3$ ) for **6**. U(eq) is defined as one third of the trace of the orthogonalized  $U^{ij}$  tensor.

|        | x          | y        | z       | U(eq) |
|--------|------------|----------|---------|-------|
| C(1)   | 134(8)     | 2903(4)  | 1022(4) | 10(1) |
| N(2)   | 22(7)      | 3063(4)  | 2190(3) | 13(1) |
| C(3)   | 1574(9)    | 2311(4)  | 3003(4) | 12(1) |
| C(4)   | 3287(8)    | 1408(4)  | 2624(4) | 11(1) |
| N(5)   | 5113(8)    | 552(4)   | 3272(4) | 15(1) |
| C(6)   | 6385(8)    | -146(4)  | 2472(4) | 12(1) |
| C(7)   | 8424(9)    | -1057(5) | 2684(5) | 17(1) |
| C(8)   | 9355(10)   | -1620(5) | 1719(5) | 19(1) |
| C(9)   | 8327(10)   | -1276(5) | 527(5)  | 19(1) |
| C(10)  | 6319(9)    | -362(4)  | 316(4)  | 14(1) |
| C(11)  | 5350(8)    | 229(4)   | 1291(4) | 13(1) |
| C(12)  | 3399(8)    | 1203(4)  | 1359(4) | 9(1)  |
| C(13)  | 1737(8)    | 1994(4)  | 552(4)  | 11(1) |
| O(14)  | -1359(6)   | 3720(3)  | 199(3)  | 11(1) |
| C(15)  | -3250(9)   | 4564(4)  | 679(4)  | 14(1) |
| C(16)  | -4623(10)  | 5348(5)  | -428(4) | 17(1) |
| C(17)  | -6654(11)  | 6281(5)  | -18(6)  | 25(1) |
| C(1')  | -4838(8)   | 1932(4)  | 6242(4) | 12(1) |
| N(2')  | -4984(7)   | 1776(4)  | 7478(3) | 13(1) |
| C(3')  | -3432(9)   | 2542(4)  | 7950(4) | 12(1) |
| C(4')  | -1716(9)   | 3445(4)  | 7155(4) | 12(1) |
| N(5')  | 78(7)      | 4301(4)  | 7430(3) | 13(1) |
| C(6')  | 1377(9)    | 5012(4)  | 6309(4) | 13(1) |
| C(7')  | 3420(9)    | 5931(5)  | 6129(4) | 17(1) |
| C(8')  | 4431(10)   | 6476(5)  | 4892(5) | 18(1) |
| C(9')  | 3490(10)   | 6146(5)  | 3863(5) | 19(1) |
| C(10') | 1455(9)    | 5213(4)  | 4051(4) | 13(1) |
| C(11') | 426(8)     | 4633(4)  | 5293(4) | 12(1) |
| C(12') | -1583(8)   | 3645(4)  | 5812(4) | 8(1)  |
| C(13') | -3218(8)   | 2854(4)  | 5351(4) | 12(1) |
| O(14') | -6327(6)   | 1126(3)  | 5785(3) | 12(1) |
| C(15') | -8194(9)   | 266(4)   | 6678(4) | 13(1) |
| C(16') | -9644(10)  | -517(5)  | 5949(5) | 18(1) |
| C(17') | -11542(12) | -1499(5) | 6855(5) | 26(1) |

**Table S9.** Bond lengths [ $\text{\AA}$ ] and angles [ $^\circ$ ] for **6**.

|                   |          |                    |          |
|-------------------|----------|--------------------|----------|
| C(1)-N(2)         | 1.330(5) | C(1)-O(14)         | 1.358(5) |
| C(1)-C(13)        | 1.393(5) | N(2)-C(3)          | 1.343(6) |
| N(2)-H(2A)        | 0.8800   | C(3)-C(4)          | 1.377(6) |
| C(3)-H(3A)        | 0.9500   | C(4)-N(5)          | 1.396(6) |
| C(4)-C(12)        | 1.452(6) | N(5)-C(6)          | 1.377(6) |
| C(6)-C(7)         | 1.389(6) | C(6)-C(11)         | 1.412(6) |
| C(7)-C(8)         | 1.371(7) | C(7)-H(7A)         | 0.9500   |
| C(8)-C(9)         | 1.420(7) | C(8)-H(8A)         | 0.9500   |
| C(9)-C(10)        | 1.379(7) | C(9)-H(9A)         | 0.9500   |
| C(10)-C(11)       | 1.403(6) | C(10)-H(10A)       | 0.9500   |
| C(11)-C(12)       | 1.412(6) | C(12)-C(13)        | 1.393(6) |
| C(13)-H(13A)      | 0.9500   | O(14)-C(15)        | 1.438(5) |
| C(15)-C(16)       | 1.512(7) | C(15)-H(15D)       | 0.9900   |
| C(15)-H(15E)      | 0.9900   | C(16)-C(17)        | 1.514(6) |
| C(16)-H(16C)      | 0.9900   | C(16)-H(16D)       | 0.9900   |
| C(17)-H(17C)      | 0.9800   | C(17)-H(17D)       | 0.9800   |
| C(17)-H(17E)      | 0.9800   | C(1')-N(2')        | 1.321(5) |
| C(1')-O(14')      | 1.357(5) | C(1')-C(13')       | 1.401(6) |
| N(2')-C(3')       | 1.358(6) | N(2')-H(2'A)       | 0.8800   |
| C(3')-C(4')       | 1.372(6) | C(3')-H(3'A)       | 0.9500   |
| C(4')-N(5')       | 1.395(6) | C(4')-C(12')       | 1.432(6) |
| N(5')-C(6')       | 1.380(5) | C(6')-C(7')        | 1.396(7) |
| C(6')-C(11')      | 1.405(6) | C(7')-C(8')        | 1.386(6) |
| C(7')-H(7'A)      | 0.9500   | C(8')-C(9')        | 1.392(7) |
| C(8')-H(8'A)      | 0.9500   | C(9')-C(10')       | 1.401(7) |
| C(9')-H(9'A)      | 0.9500   | C(10')-C(11')      | 1.399(6) |
| C(10')-H(10B)     | 0.9500   | C(11')-C(12')      | 1.438(6) |
| C(12')-C(13')     | 1.396(6) | C(13')-H(13B)      | 0.9500   |
| O(14')-C(15')     | 1.443(5) | C(15')-C(16')      | 1.523(6) |
| C(15')-H(15A)     | 0.9900   | C(15')-H(15B)      | 0.9900   |
| C(16')-C(17')     | 1.520(7) | C(16')-H(16A)      | 0.9900   |
| C(16')-H(16B)     | 0.9900   | C(17')-H(17A)      | 0.9800   |
| C(17')-H(17B)     | 0.9800   | C(17')-H(17F)      | 0.9800   |
| N(2)-C(1)-O(14)   | 117.8(4) | N(2)-C(1)-C(13)    | 125.3(4) |
| O(14)-C(1)-C(13)  | 116.8(4) | C(1)-N(2)-C(3)     | 118.8(4) |
| C(1)-N(2)-H(2A)   | 120.6    | C(3)-N(2)-H(2A)    | 120.6    |
| N(2)-C(3)-C(4)    | 120.5(4) | N(2)-C(3)-H(3A)    | 119.8    |
| C(4)-C(3)-H(3A)   | 119.8    | C(3)-C(4)-N(5)     | 131.1(4) |
| C(3)-C(4)-C(12)   | 121.4(4) | N(5)-C(4)-C(12)    | 107.6(3) |
| C(6)-N(5)-C(4)    | 108.9(4) | N(5)-C(6)-C(7)     | 129.3(4) |
| N(5)-C(6)-C(11)   | 109.2(4) | C(7)-C(6)-C(11)    | 121.5(4) |
| C(8)-C(7)-C(6)    | 117.8(5) | C(8)-C(7)-H(7A)    | 121.1    |
| C(6)-C(7)-H(7A)   | 121.1    | C(7)-C(8)-C(9)     | 121.9(5) |
| C(7)-C(8)-H(8A)   | 119.0    | C(9)-C(8)-H(8A)    | 119.0    |
| C(10)-C(9)-C(8)   | 120.1(4) | C(10)-C(9)-H(9A)   | 120.0    |
| C(8)-C(9)-H(9A)   | 120.0    | C(9)-C(10)-C(11)   | 118.8(5) |
| C(9)-C(10)-H(10A) | 120.6    | C(11)-C(10)-H(10A) | 120.6    |

**Table s9.** (continued)

|                      |          |                      |          |
|----------------------|----------|----------------------|----------|
| C(10)-C(11)-C(12)    | 132.3(4) | C(10)-C(11)-C(6)     | 119.9(4) |
| C(12)-C(11)-C(6)     | 107.9(4) | C(13)-C(12)-C(11)    | 137.4(4) |
| C(13)-C(12)-C(4)     | 116.2(4) | C(11)-C(12)-C(4)     | 106.4(4) |
| C(12)-C(13)-C(1)     | 117.8(4) | C(12)-C(13)-H(13A)   | 121.1    |
| C(1)-C(13)-H(13A)    | 121.1    | C(1)-O(14)-C(15)     | 118.4(3) |
| O(14)-C(15)-C(16)    | 107.1(4) | O(14)-C(15)-H(15D)   | 110.3    |
| C(16)-C(15)-H(15D)   | 110.3    | O(14)-C(15)-H(15E)   | 110.3    |
| C(16)-C(15)-H(15E)   | 110.3    | H(15D)-C(15)-H(15E)  | 108.6    |
| C(15)-C(16)-C(17)    | 111.1(4) | C(15)-C(16)-H(16C)   | 109.4    |
| C(17)-C(16)-H(16C)   | 109.4    | C(15)-C(16)-H(16D)   | 109.4    |
| C(17)-C(16)-H(16D)   | 109.4    | H(16C)-C(16)-H(16D)  | 108.0    |
| C(16)-C(17)-H(17C)   | 109.5    | C(16)-C(17)-H(17D)   | 109.5    |
| H(17C)-C(17)-H(17D)  | 109.5    | C(16)-C(17)-H(17E)   | 109.5    |
| H(17C)-C(17)-H(17E)  | 109.5    | H(17D)-C(17)-H(17E)  | 109.5    |
| N(2')-C(1')-O(14')   | 118.3(4) | N(2')-C(1')-C(13')   | 125.1(4) |
| O(14')-C(1')-C(13')  | 116.6(4) | C(1')-N(2')-C(3')    | 118.8(4) |
| C(1')-N(2')-H(2'A)   | 120.6    | C(3')-N(2')-H(2'A)   | 120.6    |
| N(2')-C(3')-C(4')    | 120.4(4) | N(2')-C(3')-H(3'A)   | 119.8    |
| C(4')-C(3')-H(3'A)   | 119.8    | C(3')-C(4')-N(5')    | 130.0(4) |
| C(3')-C(4')-C(12')   | 121.3(4) | N(5')-C(4')-C(12')   | 108.7(4) |
| C(6')-N(5')-C(4')    | 108.4(4) | N(5')-C(6')-C(7')    | 128.5(4) |
| N(5')-C(6')-C(11')   | 109.6(4) | C(7')-C(6')-C(11')   | 121.9(4) |
| C(8')-C(7')-C(6')    | 116.6(5) | C(8')-C(7')-H(7'A)   | 121.7    |
| C(6')-C(7')-H(7'A)   | 121.7    | C(7')-C(8')-C(9')    | 122.8(5) |
| C(7')-C(8')-H(8'A)   | 118.6    | C(9')-C(8')-H(8'A)   | 118.6    |
| C(8')-C(9')-C(10')   | 120.2(4) | C(8')-C(9')-H(9'A)   | 119.9    |
| C(10')-C(9')-H(9'A)  | 119.9    | C(11')-C(10')-C(9')  | 118.1(4) |
| C(11')-C(10')-H(10B) | 121.0    | C(9')-C(10')-H(10B)  | 121.0    |
| C(10')-C(11')-C(6')  | 120.3(4) | C(10')-C(11')-C(12') | 132.3(4) |
| C(6')-C(11')-C(12')  | 107.4(4) | C(13')-C(12')-C(4')  | 117.1(4) |
| C(13')-C(12')-C(11') | 136.9(4) | C(4')-C(12')-C(11')  | 106.0(4) |
| C(12')-C(13')-C(1')  | 117.2(4) | C(12')-C(13')-H(13B) | 121.4    |
| C(1')-C(13')-H(13B)  | 121.4    | C(1')-O(14')-C(15')  | 117.1(3) |
| O(14')-C(15')-C(16') | 107.5(3) | O(14')-C(15')-H(15A) | 110.2    |
| C(16')-C(15')-H(15A) | 110.2    | O(14')-C(15')-H(15B) | 110.2    |
| C(16')-C(15')-H(15B) | 110.2    | H(15A)-C(15')-H(15B) | 108.5    |
| C(17')-C(16')-C(15') | 109.9(4) | C(17')-C(16')-H(16A) | 109.7    |
| C(15')-C(16')-H(16A) | 109.7    | C(17')-C(16')-H(16B) | 109.7    |
| C(15')-C(16')-H(16B) | 109.7    | H(16A)-C(16')-H(16B) | 108.2    |
| C(16')-C(17')-H(17A) | 109.5    | C(16')-C(17')-H(17B) | 109.5    |
| H(17A)-C(17')-H(17B) | 109.5    | C(16')-C(17')-H(17F) | 109.5    |
| H(17A)-C(17')-H(17F) | 109.5    | H(17B)-C(17')-H(17F) | 109.5    |

**Table s10.** Anisotropic displacement parameters ( $\text{\AA}^2 \times 10^3$ ) for **6**. The anisotropic displacement factor exponent takes the form:  $-2\pi^3 [ h^3 a^{*2}U^{11} + \dots + 2 h k a^* b^* U^{12} ]$

|        | U <sup>11</sup> | U <sup>22</sup> | U <sup>33</sup> | U <sup>23</sup> | U <sup>13</sup> | U <sup>12</sup> |
|--------|-----------------|-----------------|-----------------|-----------------|-----------------|-----------------|
| C(1)   | 8(2)            | 18(2)           | 4(2)            | -2(1)           | -2(1)           | -2(2)           |
| N(2)   | 12(2)           | 22(2)           | 7(2)            | -8(1)           | -1(1)           | -1(1)           |
| C(3)   | 13(2)           | 20(2)           | 5(2)            | -5(2)           | -2(2)           | 1(2)            |
| C(4)   | 12(2)           | 16(1)           | 7(1)            | -4(1)           | -4(1)           | 0(1)            |
| N(5)   | 14(2)           | 24(2)           | 8(2)            | -7(1)           | -6(1)           | 4(1)            |
| C(6)   | 11(2)           | 21(2)           | 6(2)            | -3(2)           | -2(2)           | -3(2)           |
| C(7)   | 13(2)           | 27(2)           | 11(2)           | -1(2)           | -4(2)           | 0(2)            |
| C(8)   | 21(2)           | 19(2)           | 17(2)           | -3(2)           | -8(2)           | 2(2)            |
| C(9)   | 20(2)           | 28(2)           | 11(2)           | -8(2)           | -2(2)           | 2(2)            |
| C(10)  | 18(2)           | 16(2)           | 7(2)            | -3(2)           | -1(2)           | -1(2)           |
| C(11)  | 9(2)            | 19(2)           | 9(2)            | -1(2)           | -1(2)           | -3(2)           |
| C(12)  | 11(2)           | 10(1)           | 5(1)            | 0(1)            | -3(1)           | -2(1)           |
| C(13)  | 12(2)           | 20(2)           | 3(2)            | -4(2)           | -1(2)           | -2(2)           |
| O(14)  | 13(1)           | 17(1)           | 7(1)            | -6(1)           | -5(1)           | 2(1)            |
| C(15)  | 12(2)           | 21(2)           | 11(2)           | -7(2)           | -1(2)           | 3(2)            |
| C(16)  | 19(2)           | 23(2)           | 9(2)            | -5(2)           | -1(2)           | 5(2)            |
| C(17)  | 24(2)           | 24(2)           | 29(3)           | -12(2)          | -11(2)          | 8(2)            |
| C(1')  | 11(2)           | 21(2)           | 6(2)            | -5(2)           | -2(2)           | 2(2)            |
| N(2')  | 12(2)           | 21(2)           | 7(2)            | -4(1)           | -4(1)           | 0(1)            |
| C(3')  | 15(2)           | 18(2)           | 5(2)            | -5(2)           | -2(2)           | -1(2)           |
| C(4')  | 13(2)           | 15(2)           | 9(2)            | -4(2)           | -3(2)           | -2(2)           |
| N(5')  | 16(2)           | 20(2)           | 6(2)            | -6(1)           | -1(1)           | -3(1)           |
| C(6')  | 12(2)           | 21(2)           | 8(2)            | -8(2)           | -2(2)           | 2(2)            |
| C(7')  | 17(2)           | 24(2)           | 10(2)           | -6(2)           | -5(2)           | -1(2)           |
| C(8')  | 22(2)           | 21(2)           | 12(2)           | -3(2)           | -2(2)           | 0(2)            |
| C(9')  | 16(2)           | 30(2)           | 11(2)           | -3(2)           | -2(2)           | 1(2)            |
| C(10') | 14(2)           | 21(2)           | 6(2)            | -6(2)           | -2(2)           | 2(2)            |
| C(11') | 9(2)            | 22(2)           | 4(2)            | -4(2)           | -3(2)           | 2(2)            |
| C(12') | 11(2)           | 7(2)            | 7(2)            | -4(1)           | -4(1)           | 3(1)            |
| C(13') | 13(2)           | 16(1)           | 7(1)            | -6(1)           | 0(1)            | 1(1)            |
| O(14') | 12(2)           | 21(2)           | 4(1)            | -4(1)           | -4(1)           | -2(1)           |
| C(15') | 11(2)           | 22(2)           | 8(2)            | -5(2)           | -3(2)           | -2(2)           |
| C(16') | 19(2)           | 24(2)           | 12(2)           | -7(2)           | -3(2)           | -5(2)           |
| C(17') | 33(3)           | 22(2)           | 24(2)           | -11(2)          | 3(2)            | -10(2)          |

**Table s11.** Hydrogen coordinates ( $\times 10^4$ ) and isotropic displacement parameters ( $\text{\AA}^2 \times 10^3$ ) for **6**.

|        | x      | y     | z     | U(eq) |
|--------|--------|-------|-------|-------|
| H(2A)  | -1050  | 3652  | 2427  | 16    |
| H(3A)  | 1490   | 2402  | 3846  | 15    |
| H(7A)  | 9151   | -1284 | 3472  | 21    |
| H(8A)  | 10727  | -2258 | 1852  | 23    |
| H(9A)  | 9025   | -1676 | -126  | 23    |
| H(10A) | 5604   | -136  | -475  | 16    |
| H(13A) | 1697   | 1917  | -290  | 14    |
| H(15D) | -2368  | 5180  | 1069  | 17    |
| H(15E) | -4528  | 4015  | 1328  | 17    |
| H(16C) | -5483  | 4720  | -812  | 20    |
| H(16D) | -3318  | 5877  | -1077 | 20    |
| H(17C) | -7595  | 6731  | -740  | 37    |
| H(17D) | -5787  | 6951  | 297   | 37    |
| H(17E) | -7897  | 5764  | 655   | 37    |
| H(2'A) | -6068  | 1187  | 7987  | 16    |
| H(3'A) | -3535  | 2452  | 8836  | 15    |
| H(7'A) | 4084   | 6171  | 6820  | 20    |
| H(8'A) | 5826   | 7103  | 4740  | 22    |
| H(9'A) | 4231   | 6553  | 3031  | 23    |
| H(10B) | 792    | 4982  | 3356  | 16    |
| H(13B) | -3230  | 2938  | 4471  | 14    |
| H(15A) | -9442  | 807   | 7092  | 16    |
| H(15B) | -7279  | -355  | 7338  | 16    |
| H(16A) | -10618 | 109   | 5317  | 21    |
| H(16B) | -8372  | -1009 | 5495  | 21    |
| H(17A) | -12678 | -1886 | 6371  | 38    |
| H(17B) | -12615 | -1030 | 7399  | 38    |
| H(17F) | -10556 | -2214 | 7378  | 38    |



**Table s12.** Torsion angles [°] for **6**.

|                         |           |                         |           |
|-------------------------|-----------|-------------------------|-----------|
| O(14)-C(1)-N(2)-C(3)    | -176.9(4) | C(13)-C(1)-N(2)-C(3)    | 0.6(6)    |
| C(1)-N(2)-C(3)-C(4)     | 1.2(6)    | N(2)-C(3)-C(4)-N(5)     | 178.2(4)  |
| N(2)-C(3)-C(4)-C(12)    | -2.4(6)   | C(3)-C(4)-N(5)-C(6)     | -179.2(4) |
| C(12)-C(4)-N(5)-C(6)    | 1.4(5)    | C(4)-N(5)-C(6)-C(7)     | 176.8(4)  |
| C(4)-N(5)-C(6)-C(11)    | -1.3(5)   | N(5)-C(6)-C(7)-C(8)     | -180.0(5) |
| C(11)-C(6)-C(7)-C(8)    | -2.1(6)   | C(6)-C(7)-C(8)-C(9)     | 1.2(7)    |
| C(7)-C(8)-C(9)-C(10)    | -0.6(7)   | C(8)-C(9)-C(10)-C(11)   | 0.9(7)    |
| C(9)-C(10)-C(11)-C(12)  | 178.1(5)  | C(9)-C(10)-C(11)-C(6)   | -1.8(6)   |
| N(5)-C(6)-C(11)-C(10)   | -179.3(4) | C(7)-C(6)-C(11)-C(10)   | 2.4(6)    |
| N(5)-C(6)-C(11)-C(12)   | 0.8(5)    | C(7)-C(6)-C(11)-C(12)   | -177.5(4) |
| C(10)-C(11)-C(12)-C(13) | -2.6(9)   | C(6)-C(11)-C(12)-C(13)  | 177.3(5)  |
| C(10)-C(11)-C(12)-C(4)  | -179.8(4) | C(6)-C(11)-C(12)-C(4)   | 0.1(5)    |
| C(3)-C(4)-C(12)-C(13)   | 1.7(6)    | N(5)-C(4)-C(12)-C(13)   | -178.8(4) |
| C(3)-C(4)-C(12)-C(11)   | 179.7(4)  | N(5)-C(4)-C(12)-C(11)   | -0.9(5)   |
| C(11)-C(12)-C(13)-C(1)  | -177.0(5) | C(4)-C(12)-C(13)-C(1)   | 0.1(6)    |
| N(2)-C(1)-C(13)-C(12)   | -1.3(6)   | O(14)-C(1)-C(13)-C(12)  | 176.2(4)  |
| N(2)-C(1)-O(14)-C(15)   | -9.2(5)   | C(13)-C(1)-O(14)-C(15)  | 173.1(4)  |
| C(1)-O(14)-C(15)-C(16)  | -179.7(4) | O(14)-C(15)-C(16)-C(17) | -179.6(4) |
| O(14)-C(1)-N(2)-C(3)    | 177.6(4)  | C(13)-C(1)-N(2)-C(3)    | -1.2(6)   |
| C(1)-N(2)-C(3)-C(4)     | -1.0(6)   | N(2)-C(3)-C(4)-N(5)     | -178.4(4) |
| N(2)-C(3)-C(4)-C(12)    | 2.5(6)    | C(3)-C(4)-N(5)-C(6)     | 179.6(5)  |
| C(12)-C(4)-N(5)-C(6)    | -1.3(5)   | C(4)-N(5)-C(6)-C(7)     | -176.6(4) |
| C(4)-N(5)-C(6)-C(11)    | 0.4(5)    | N(5)-C(6)-C(7)-C(8)     | 178.1(5)  |
| C(11)-C(6)-C(7)-C(8)    | 1.4(6)    | C(6)-C(7)-C(8)-C(9)     | 0.2(7)    |
| C(7)-C(8)-C(9)-C(10)    | -0.7(8)   | C(8)-C(9)-C(10)-C(11)   | -0.2(7)   |
| C(9)-C(10)-C(11)-C(6)   | 1.8(6)    | C(9)-C(10)-C(11)-C(12)  | -178.5(4) |
| N(5)-C(6)-C(11)-C(10)   | -179.7(4) | C(7)-C(6)-C(11)-C(10)   | -2.4(6)   |
| N(5)-C(6)-C(11)-C(12)   | 0.6(5)    | C(7)-C(6)-C(11)-C(12)   | 177.8(4)  |
| C(3)-C(4)-C(12)-C(13)   | -1.8(6)   | N(5)-C(4)-C(12)-C(13)   | 178.9(4)  |
| C(3)-C(4)-C(12)-C(11)   | -179.2(4) | N(5)-C(4)-C(12)-C(11)   | 1.6(5)    |
| C(10)-C(11)-C(12)-C(13) | 2.4(9)    | C(6)-C(11)-C(12)-C(13)  | -177.8(5) |
| C(10)-C(11)-C(12)-C(4)  | 178.9(5)  | C(6)-C(11)-C(12)-C(4)   | -1.3(5)   |
| C(4)-C(12)-C(13)-C(1)   | -0.2(6)   | C(11)-C(12)-C(13)-C(1)  | 176.1(5)  |
| N(2)-C(1)-C(13)-C(12)   | 1.7(6)    | O(14)-C(1)-C(13)-C(12)  | -177.0(4) |
| N(2)-C(1)-O(14)-C(15)   | 7.2(5)    | C(13)-C(1)-O(14)-C(15)  | -174.0(4) |
| C(1)-O(14)-C(15)-C(16)  | 179.1(4)  | O(14)-C(15)-C(16)-C(17) | 176.9(4)  |
